# Supplementary material for: Use of information and communication technologies (ICTs) in cancer multidisciplinary team meetings: an explorative study based on EU healthcare professionals
Source: PubMed Central journal article supplement — BMJ Open. 2022 Oct 6;12(10):e051181. doi: 10.1136/bmjopen-2021-051181 (PMC9540836; doi:10.1136/bmjopen-2021-051181), 2022-10-06
Supplement: bmjopen-2021-051181.draft_revisions.pdf [file bmjopen-2021-051181.draft_revisions.pdf]

# BMJ Open

BMJ Open is committed to open peer review. As part of this commitment we make the peer review history of every article we publish publicly available.

When an article is published we post the peer reviewers' comments and the authors' responses online. We also post the versions of the paper that were used during peer review. These are the versions that the peer review comments apply to.

The versions of the paper that follow are the versions that were submitted during the peer review process. They are not the versions of record or the final published versions. They should not be cited or distributed as the published version of this manuscript.

BMJ Open is an open access journal and the full, final, typeset and author-corrected version of record of the manuscript is available on our site with no access controls, subscription charges or pay-per-view fees (<http://bmjopen.bmj.com>).

If you have any questions on BMJ Open's open peer review process please email [info.bmjopen@bmj.com](mailto:info.bmjopen@bmj.com)

# BMJ Open

## A second transition for cancer multidisciplinary teams (MDTs)? A European study based on the perspective of healthcare professionals

|                               |                                                                                                                                                                                                                                                                                                                                                                                                                                                                                                                                                                                                                    |
|-------------------------------|--------------------------------------------------------------------------------------------------------------------------------------------------------------------------------------------------------------------------------------------------------------------------------------------------------------------------------------------------------------------------------------------------------------------------------------------------------------------------------------------------------------------------------------------------------------------------------------------------------------------|
| Journal:                      | <i>BMJ Open</i>                                                                                                                                                                                                                                                                                                                                                                                                                                                                                                                                                                                                    |
| Manuscript ID                 | bmjopen-2021-051181                                                                                                                                                                                                                                                                                                                                                                                                                                                                                                                                                                                                |
| Article Type:                 | Original research                                                                                                                                                                                                                                                                                                                                                                                                                                                                                                                                                                                                  |
| Date Submitted by the Author: | 11-Mar-2021                                                                                                                                                                                                                                                                                                                                                                                                                                                                                                                                                                                                        |
| Complete List of Authors:     | Prades, J; Catalan Institute of Oncology, Catalan Cancer Strategy; Institut Català d'Oncologia<br>Coll-Ortega, Cristina<br>Dal Lago, Lissandra; Jules Bordet Institute<br>Goffin, Karolien; KU Leuven<br>Javor, Eugen; Bjelovar General Hospital<br>Lombardo, Claudio<br>de Munter, Johan; University Hospital Ghent<br>Ponce, Jordi; Bellvitge University Hospital<br>Regge, Daniele; Candiolo Cancer Institute<br>Salazar, Ramón; Catalan Institute of Oncology<br>Valentini, Vincenzo; Fondazione Policlinico Universitario Agostino Gemelli IRCCS<br>Borras, Josep; University of Barcelona, Clinical Sciences |
| Keywords:                     | ONCOLOGY, HEALTH SERVICES ADMINISTRATION & MANAGEMENT, Information technology < BIOTECHNOLOGY & BIOINFORMATICS, Telemedicine < BIOTECHNOLOGY & BIOINFORMATICS                                                                                                                                                                                                                                                                                                                                                                                                                                                      |
|                               |                                                                                                                                                                                                                                                                                                                                                                                                                                                                                                                                                                                                                    |

SCHOLARONE™  
Manuscripts

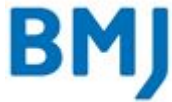

I, the Submitting Author has the right to grant and does grant on behalf of all authors of the Work (as defined in the below author licence), an exclusive licence and/or a non-exclusive licence for contributions from authors who are: i) UK Crown employees; ii) where BMJ has agreed a CC-BY licence shall apply, and/or iii) in accordance with the terms applicable for US Federal Government officers or employees acting as part of their official duties; on a worldwide, perpetual, irrevocable, royalty-free basis to BMJ Publishing Group Ltd ("BMJ") its licensees and where the relevant Journal is co-owned by BMJ to the co-owners of the Journal, to publish the Work in this journal and any other BMJ products and to exploit all rights, as set out in our [licence](#).

The Submitting Author accepts and understands that any supply made under these terms is made by BMJ to the Submitting Author unless you are acting as an employee on behalf of your employer or a postgraduate student of an affiliated institution which is paying any applicable article publishing charge ("APC") for Open Access articles. Where the Submitting Author wishes to make the Work available on an Open Access basis (and intends to pay the relevant APC), the terms of reuse of such Open Access shall be governed by a Creative Commons licence – details of these licences and which [Creative Commons](#) licence will apply to this Work are set out in our licence referred to above.

Other than as permitted in any relevant BMJ Author's Self Archiving Policies, I confirm this Work has not been accepted for publication elsewhere, is not being considered for publication elsewhere and does not duplicate material already published. I confirm all authors consent to publication of this Work and authorise the granting of this licence.

## A second transition for cancer multidisciplinary teams (MDTs)? A European study based on the perspective of healthcare professionals

Joan Prades<sup>1,11</sup>, Cristina Coll-Ortega<sup>1</sup>, Lissandra Dal Lago<sup>2</sup>, Karolien Goffin<sup>3</sup>, Eugen Javor<sup>4</sup>, Claudio Lombardo<sup>5</sup>, Johan de Munter<sup>6</sup>, Jordi Ponce<sup>7</sup>, Daniele Regge<sup>8</sup>, Ramón Salazar<sup>9</sup>, Vincenzo Valentini<sup>10</sup>, Josep M. Borrás<sup>1,11</sup>

<sup>1</sup> Catalanian Cancer Strategy, Department of Health, Barcelona, Spain

<sup>2</sup> Department of Medicine, Institut Jules Bordet, Université Libre de Bruxelles, 1 Rue Héger Bordet, 1000, Brussels, Belgium, and International Society of Geriatric Oncology (SIOG).

<sup>3</sup> Department of Nuclear Medicine, University Hospital Leuven, Division of Nuclear Medicine and Molecular Imaging, KU Leuven, Leuven, Belgium, and European Association of Nuclear Medicine.

<sup>4</sup> Pharmacy Department, General Hospital Bjelovar, Bjelovar, Croatia, and European Society of Oncology Pharmacy (ESOP).

<sup>5</sup> Organisation of European Cancer Institutes (OEI), Rue d'Egmont, 11, 1000 Brussels, Belgium, and SOS Europe, Via B.Bosco 57/9A, 16121, Genova, Italia.

<sup>6</sup> Cancer Center, University Hospital Ghent, Ghent, Belgium, and European Oncology Nursing Society, Brussels, Belgium.

<sup>7</sup> University Hospital of Bellvitge, Department of Gynaecology, Barcelona, Spain, University of Barcelona (IDIBELL) and ExCouncil Member of European Society of Gynaecological Oncology (ESGO)

<sup>8</sup> Department of Radiology, Candiolo Cancer Institute, FPO-IRCCS, Candiolo, Italy, Department of Surgical Sciences, University of Turin, Turin, Italy and Associate Professor in Radiology, University of Torino, Italy and Europe, and European Society of Radiology (ESR).

<sup>9</sup> Institut Català d'Oncologia, Oncobell Program, IDIBELL, CIBERONC, University of Barcelona, L'Hospitalet de Llobregat, Barcelona, Spain and European Society of Medical Oncology (ESMO).

<sup>10</sup> Radiation Oncology and Hematology Department, Fondazione Policlinico Universitario A.Gemelli IRCCS, Università Cattolica S.Cuore– ROME (I) and European Society for Radiotherapy & Oncology (ESTRO).

<sup>11</sup> Department of Clinical Sciences, University of Barcelona (IDIBELL).

## Abstract

**Introduction:** Multidisciplinary teams in cancer care are increasingly using information and communication technology (ICT), hospital health information system (HIS) functionalities, and ICT-driven care components. We aimed to explore the use of these tools in multidisciplinary team meetings (MTMs) and to identify the critical challenges posed by their adoption.

**Methods:** A qualitative methodology was used to analyse health professionals' perspectives, based on discussion of cases and focus groups with representatives of European scientific societies. Thematic analysis informed a narrative description of the use of ICTs and care components in cancer MTMs.

**Results:** Up to 10 ICTs, HIS functionalities, and care components are embedded in the informational and decision-making processes along three stages of MTMs. ICTs play a key role in opening MTMs to other institutions (e.g., by means of molecular tumour boards) and information types (e.g. patient-reported outcome measures), and in contributing to the internal efficiency of teams through multidisciplinary electronic agendas. ICTs also enable the use of clinical decision support systems for improving MTM decisions and contribute to assessing teams' performance. While ICTs and care components have their own challenges, the information technology context is characterised by HIS that are conceived to store and classify information rather than to work with it, the massive generation of unstructured data and the lack of interoperability between systems from different hospitals. This limits the potential impact of ICTs and care components.

**Conclusions:** The emergence of an MTM model that is better integrated in the wider health system context and incorporates inputs from patients and support systems make traditional meetings more dynamic and interconnected. Although these changes signal a second transition in the development process of multidisciplinary teams, they occur in a context marked by clear gaps between the information and management needs of MTMs and the adequacy of current IT systems.

### Strengths and limitations of this study

- The manuscript proposes the exploration of the mostly adopted information and communication technologies (ICTs), hospital health information system (HIS) functionalities, and ICT-driven care components in multidisciplinary team meetings (MTMs).

1  
2  
3 - A qualitative study was conducted based on key informants from different European scientific  
4 societies and health systems.  
5

6  
7 - Key informants were experienced in adopting the implementation of ICT in MTMs, and this was  
8 useful for both case presentation (including unsuccessful practices) and focus group discussion.  
9

10  
11 - Owing to the explorative nature of the study, it was not possible to capture all ICTs and care  
12 components being used in MTMs and this way achieve data saturation.  
13  
14

15  
16  
17 **Keywords:** Neoplasms, Information Technology, Patient Care Team, Interdisciplinary  
18 Communication.  
19  
20  
21  
22  
23  
24  
25  
26  
27  
28  
29  
30  
31  
32  
33  
34  
35  
36  
37  
38  
39  
40  
41  
42  
43  
44  
45  
46  
47  
48  
49  
50  
51  
52  
53  
54  
55  
56  
57  
58  
59  
60

## Introduction

Since the 1990s, multidisciplinary teams (MDTs) for cancer care have improved their internal organisation, increasing the representativeness of the team by including more roles and broadening care objectives and scope of practice to new areas of care (e.g. survivorship care).<sup>1</sup> Although there are pronounced organisational and financial differences between MDTs from different European health systems,<sup>2</sup> all MDTs are characterised by the central role of the multidisciplinary team meeting (MTM) – also referred as tumour board or multidisciplinary cancer conference – as the main decision-making body.<sup>3</sup> These meetings represent a widely recognised standard of care, including in different accreditation and quality systems.<sup>4,5,6,7</sup>

The use of information and communication technologies (ICTs) have taken off in the 21st century, facilitating new modes of MDT interaction and streamlining information management processes.<sup>8</sup> In fact, the potential to transform multidisciplinary cancer care extends beyond typical ICT functionalities like virtual MTMs and telehealth, encompassing the integration of other care components like patient-reported outcome measures (PROMs) and clinical decision support systems (CDSS) into hospitals' ICT and health information systems (HIS). The adoption of ehealth practice is generally modest and uneven between different European health systems, and unsuccessful experiences are not unheard of; however, the qualitative leap in the use of ICTs – clearly accelerated by the COVID-19 pandemic<sup>9,10</sup> – and associated care components raises the question of whether MDTs are undergoing a second transition.

The European Commission's Innovative Partnership for Action Against Cancer (iPAAC) Joint Action, defined as a priority the issue of how ICTs affect the daily work of cancer MDTs, an ambitious endeavour that was tackled in collaboration with the European scientific societies. In this study, we explored the set of ICTs, HIS-based functionalities, and associated care components used by MTMs in order to identify the critical challenges posed by their adoption.

## Methods

### *Study design and setting*

Health professionals' perspectives on the use of ICTs, HIS, and associated care components in cancer MTMs were analysed by qualitative methodology. A multidisciplinary European workshop, lasting approximately 5 hours, was organised on 5 July 2019 in a neutral setting (European CanCer Organisation (ECCO) headquarters in Brussels). The workshop was divided in two phases. In the first, each professional presented a prepared case study from the perspective of their medical discipline and based on their local experience. The contrasts revealed sparked reflections about different providers and healthcare systems. Secondly, focus groups were used to explore the opinions and normative systems<sup>11</sup> through group interactions, which brought to light personal experiences and knowledge about IT-led informational and clinical decision-making processes embedded in MTMs.

### *Selection of informants and sampling strategy*

The workshop was co-organised between the Catalan Institute of Oncology (ICO) and ECCO within the framework of the iPAAC Joint Action. ECCO played a gatekeeper role in the selection of key informants, sending a letter of invitation prepared by the researchers to different European scientific societies and explaining the reasons for the study. For selection of informants and composition of the purposive sample, informants were designated by the scientific societies according to three inclusion criteria: (1) experienced in leading and/or adopting the implementation of ICT; (2) working in a multidisciplinary cancer care environment; and (3) from different healthcare areas and European health systems. The exclusion criterion, emphasised by ECCO when contacting the different societies, consisted of avoiding the participation of experts in medical technologies or ICTs exclusively from a technical point of view. Clinical reasoning on ICTs rather than focusing on technologies themselves was the critical aspect of the selection. Of the initially envisaged 10 participants, 9 professionals from different European scientific societies, including the Organisation of European Cancer Institutes, were finally enrolled (table 1).

### *Analysis*

Two researchers conducted the meeting, with one acting as moderator (JP) and the other as observer (CC). A sheet containing information about the study goals and a consent form were handed out before starting. The researchers (CC, JP) took field notes during the case study presentations. Spontaneous interaction was encouraged during the focus group session, which was recorded and transcribed verbatim. Researchers checked for consistency between the recording and text and conducted the subsequent analysis. Some quotations from the session are used



1  
2  
3 anonymously in the present paper (table 2). Four issues (corresponding to MTM stages) were used  
4 to organise the discussion: patient data collection and accessibility, case presentation, results and  
5 implications of MTMs discussions, and virtual MTMs (table 3).  
6  
7

8  
9 To analyse the data, we applied thematic analysis criteria, which emphasise the meaning of the text  
10 and interpret its thematic content.<sup>12,13</sup> We read through the transcript to identify general themes  
11 and specific categories within the themes, ensuring interpreter consensus. Only one researcher  
12 coded the data (JP). The research process was inductive, with a constant effort to capture ICTs and  
13 other care components related to MTMs, along with their implications and challenges. Atlas-ti 6.2  
14 software<sup>14</sup> was used to systematically code and analyse data: all textual data were indexed and co-  
15 occurring codes identified. However, the software was used in a limited way to rearrange the data,  
16 construct charts, and find associations between themes. Preliminary results were discussed amongst  
17 the research team and validated by workshop participants.  
18  
19

20  
21 This study was carried out in agreement with the procedures in consolidated criteria for reporting  
22 qualitative research (COREQ).<sup>15</sup> Although patients and the public were not directly involved in this  
23 research, it should be mentioned that all objectives of iPAAC, including the one that originated this  
24 research project, were endorsed by patients organisations included as partners of this EU initiative.  
25  
26  
27  
28  
29  
30  
31  
32  
33

34 **Table 1.** Affiliations of the nine professionals interviewed  
35

| 36 <b>Organisation</b>                                  | 37 <b>Country</b> |
|---------------------------------------------------------|-------------------|
| 38 European Society of Radiology (ESR)                  | Italy             |
| 39 European Association of Nuclear Medicine (EANM)      | Belgium           |
| 40 European Oncology Nursing Society (EONS)             | Belgium           |
| 41 European Society of Oncology Pharmacy (ESOP)         | Croatia           |
| 42 International Society of Geriatric Oncology (SIOG)   | Belgium           |
| 43 Organisation of European Cancer Institutes (OEI)     | Pan-European      |
| 44 European Society for Radiotherapy & Oncology (ESTRO) | Italy             |
| 45 European Society of Medical Oncology (ESMO)          | Spain             |
| 46 European Society of Gynaecological Oncology (ESGO)   | Spain             |

47  
48  
49  
50  
51  
52  
53  
54  
55  
56  
57  
58  
59  
60

**Table 2.** Verbatim used.

|                                                                                                                                                                                                                                                                                    |
|------------------------------------------------------------------------------------------------------------------------------------------------------------------------------------------------------------------------------------------------------------------------------------|
| <b>Medical information and IT contextual factors</b>                                                                                                                                                                                                                               |
| <p>“The Electronic Health Record (EHR) is an evolution from paper, but it is not an integrated information environment.”</p>                                                                                                                                                       |
| <p>“We’re slaves to pdfs. We live in the era of medical information in pdf format. The problem is always finding it and using it.”</p>                                                                                                                                             |
| <p>“In my hospital there are a lot of systems and quite often they don’t talk to each other. For example, intensive care has a whole different system, so we can’t see what patients have behind if they come from this service. You don’t see the data; you see the summary.”</p> |
| <p>“For some CT scans, we cannot radiate the patient again, so we go all the way to retrieve this information, calling the centres, etc. We do not repeat exams for this reason.”</p>                                                                                              |
| <p>“For haematology, when we ask for whole body PET but some centres just forget and send it partially. And then you have to repeat tests.”</p>                                                                                                                                    |
| <b>(a) Preparation and organisation of the MTM</b>                                                                                                                                                                                                                                 |
| <p>“We use a template, a structured framework, since junior doctors are in charge of case presentation.”</p>                                                                                                                                                                       |
| <p>“In the old times we were just sitting next to each other, discussing the files, looking at the images, and someone was moderating the session”.</p>                                                                                                                            |
| <p>“Sometimes we have to say ‘I’ll give you advice the next day’ and check again at my dedicated work station.”</p>                                                                                                                                                                |
| <b>(b) Clinical decision-making process</b>                                                                                                                                                                                                                                        |
| <p>“The PROMs will be important in the future to make decisions in MTMs. With PROMS the patient is involved in the decision-making process. His/her data is there. It is real time data.”</p>                                                                                      |
| <p>[On CDSS:] “These systems appear as a black box. You don’t know what studies and data are in the algorithm. People are afraid because of that.”</p>                                                                                                                             |
| <p>“AI may help but the model is not pressing a button and a decision is made. Interaction between drugs is one of the most evident challenges for a CDSS.”</p>                                                                                                                    |
| <p>“The MTM includes molecular information based on biomarkers like Ki67 or HER, but which originates in the immunohistochemistry and FISH, not in the NGS. We’re still in the clinical era, but a transition has started.”</p>                                                    |
| <b>(c) Recording of decisions and outcome evaluation</b>                                                                                                                                                                                                                           |
| <p>“From an IT perspective, structured reporting of decisions would be a big change. It’s the clarity that changes, what you don’t find on a free-text report.”</p>                                                                                                                |
| <p>“ICTs are mainly found before making decisions. Afterwards they don’t help us: we don’t have much time to arrange the citations, to follow and monitor patients, to look at the results and so on. This could make a difference in optimising the resources.”</p>               |
| <p>“Sometimes you only need something really important for clinical practice and you don’t have it. There is also a lot of unnecessary data.”</p>                                                                                                                                  |

**Table 3.** Multidisciplinary team meetings (MTMs) and ICTs: focus group script**1. Data collection and accessibility**

How are the patients' lists drawn up?

How is patient information collected (sources; use of EHRs)?

Are non-cancer related data captured? How?

Is the case presentation structured? Is it electronically linked?

**2. Patient case presentation and decision-making**

How is the case presented? What information is it based on?

Are pre-treatment digitised images required in the MTMs? What quality criteria are used, if any, and what display problems have you encountered? What interoperability exists with other institutions and IT systems integration (i.e., degree of standardisation)?

What are the technological conditions (e.g., high-definition projector; double-screen; PCs in the room)?

Describe the use of PROMs/CDSS (i.e., layers of information like protocols; technology at the frontline).

**3. Results and implications of MTMs discussions**

Are the minutes of the MTM available and accessible?

Are decisions recorded on the EHR?

How are medical appointments organised?

How team results are assessed using HIS (e.g., toxicity, QoL issues; MTMs information as output)?

Are big data/real-world data generated and evaluated? If so, how?

**4. Virtual MTMs**

What is your experience with virtual MTMs? What challenges are associated with them?

Types: high-volume hospital and low-volume hospital; HVH and LVH)

How virtual MTMs are organised and implemented (engagement of dispersed members, specialists, GPs)?

Interoperability, privacy and confidentiality of patient data issues

How reliable is the technology? What difficulties exist, if any, in using technology outside a single organisation (e.g., virtual consultation of tests)?

*Abbreviations:* CDSS: clinical decision support system; EHR: electronic health record; HIS: health information system; PC: personal computer; PROM: patient-reported outcome measure; QoL: quality of life.

**Results**

Different ICTs, HIS functionalities, and ICT-driven care components were found to impact the way professionals obtain information, communicate, and make decisions in cancer MTMs. These elements were classified into four domains. Three domains correspond to the three stages of MTM development: (a) preparation and organisation, (b) clinical decision-making process, and (c) recording of decisions and outcome evaluation, while the first is a transversal domain capturing the IT contextual perspective (Fig. 1).

**Figure 1.** ICTs and components used during the MTM stages.

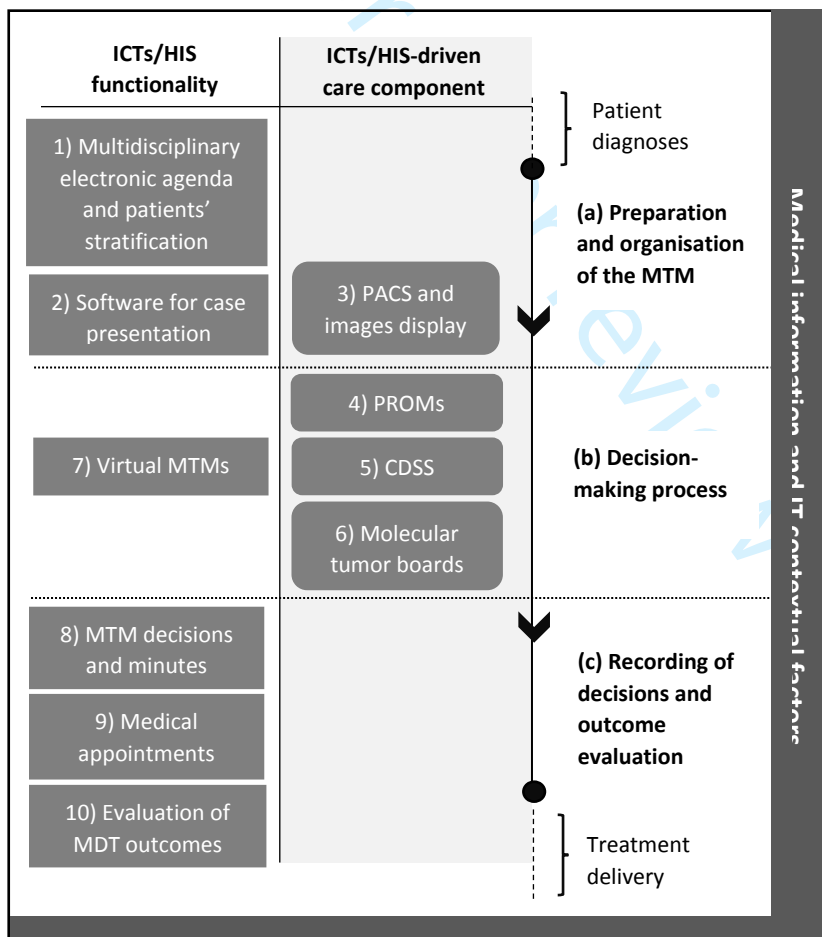

**Medical information and IT contextual factors**

Accessible information about cases under discussion in the MTM is essential for agile decision-making. Three elements of the IT context determine the degree of integration, data structuring, and standardised collection of medical information.

### *Hospital health information system (HIS): the logic of independent repositories*

The informational processes related to MDTs' activity are largely shaped by the hospital HIS, which is not generally structured around patient care processes but rather around the inputs from different functions or sub-systems of each clinical service (e.g., Pathology). This means that data collection is performed through independent repositories from which different inputs are extracted in order to draw up a summary of a patient's case and discuss it in the MTM. Several informants noted the inherent contrast with MDTs, which are cross-sectional by nature and represent care processes in and of themselves (e.g., patients with colon cancer), not just a single specialty, service, or care episode. Even though electronic health records (EHRs) link different information sources and can be practical enough to use during the MTM, they do not arrange all of the elements relevant to a patient's diagnosis and treatment in a specific and integrated way.

### *Free-text and pdf formats and the applicability of medical information*

Generally, medical information is not recorded through a single computer system from which it can be extracted or modified in a structured way. Much of the information is in a free-text format, predominantly physician-dependent and captured in a pdf, which is difficult to code, use, and access. In contrast, if the data records are electronically structured — as demonstrated for breast cancer during the workshop, ICTs/HIS can potentially change how all the available information is collected and visualised during the MTM presentation.

### *Standardisation of interhospital informational processes*

Another factor — which may represent the most time-consuming part of MTM preparation — is obtaining information for patients referred from other hospitals. IT systems from different hospitals are rarely integrated or standardised, so patients are often referred with low-quality images, images that do not meet specific requirements, and even with CD-ROMs, prompting the need for repeating tests. Professionals need to obtain the original information, not just the summary, and they cannot diagnose without downloading the original images in the system to review them properly. The lack of standardisation in the exchange of images causes important delays in decision-making, and in medical specialties applying ionising radiation, this repetition is problematic because it can be harmful to patients' health. Instead, when different hospitals agree to use a common HIS, and therefore the same EHRs for patients, referring patients does not imply any special obstacles.

## **(a) Preparation and organisation of the MTM**

### *(1) Multidisciplinary electronic patient agenda and patients' stratification*

1  
2  
3 Using a multidisciplinary electronic patient agenda to draw up patient lists helps MDTs to better  
4 anticipate and rapidly manage case discussions. Professionals wishing to discuss a case on the MTM  
5 reserve a time slot for a consultation using the hospital HIS in the same way they would do so for an  
6 appointment with any other hospital service. This way, all the professionals can see the list of  
7 patients to discuss in real time and then prepare for the meeting accordingly (i.e., patients with  
8 pending diagnostic tests results may be removed from the list). Nevertheless, informants stressed  
9 that such automation is limited in most MDTs, with no computer system used. Typically, the MTM  
10 coordinator collects and collates team members' proposals and then distributes them in the form of  
11 a medical chart containing the clinical description of each patient. Professionals also use the  
12 electronic agenda to stratify patients into high and low priority cases, distinguishing between cases  
13 that should be discussed in depth and those that only require confirmation that the treatment  
14 strategy is in line with the guideline. While stratification is informal nowadays, its digitisation would  
15 improve efficiency and organisation of the discussion process, cueing the professionals that only  
16 need to weigh in on a few cases (e.g. reconstructive surgeons, general practitioners, MDT members  
17 accessing remotely) on when they should attend.

### 28 29 *(2) Checklist & software for patient case presentation*

30  
31 Some MDTs use templates or checklists to present patient cases, while for others the mode of  
32 presentation depends on individual professionals or is assumed by junior doctors. The qualitative  
33 leap on this point occurs when the hospital HIS (or external software that processes HIS data) is  
34 capable of capturing and integrating all the relevant data that MDTs need to make decisions.  
35 Professionals can then directly narrate what is shown onscreen, not what is summarised in the  
36 medical chart. Structured case presentations have the capacity to improve efficiency,  
37 comprehensiveness, and rigor during the MTM, for example by reserving a specific slot to  
38 discuss data on the patient's geriatric situation on the information agenda. However, informants  
39 expressed caution about basing the MTM discussion on rigid checklists and computerised categories,  
40 since it may limit the individualisation and open discussion of every patient.

### 41 42 *(3) Picture Archiving and Communication System (PACS) & imaging display*

43  
44 The PACS workstation is crucial for medical imaging digitalisation and can be used in combination  
45 with a simple software programme to allow MDTs to visualise the images directly on the projector or  
46 screen used in the meeting. This greatly facilitates the presentation of images and contributes to  
47 synchronising the MDT's work; however, not all MTMs have this connection, and the ability to  
48 interpret nuclear medicine images using PACS is limited.

### 49 50 **(b) Clinical decision-making process**

1  
2  
3 *(4) Patient-reported outcome measures (PROMs)*  
4

5 Informants believed that PROMs (e.g., a symptoms questionnaire completed by patients) help to  
6 improve decision-making in MTMs by offering real-time data for discussion, reducing delays and re-  
7 discussions. For example, a PROM alert system could warn the MDT that an endometrial cancer  
8 patient is oedematous, triggering cancellation of surgery. Some uncertainty existed about whether  
9 patients should fill in the PROMs questionnaires alone or with assistance (from a health professional  
10 or dedicated software) to help them interpret the questions.  
11

12  
13  
14  
15  
16 *(5) Artificial intelligence & clinical decision support systems (CDSS)*  
17

18 Artificial intelligence, especially CDSS, which rely on pre-established clinical algorithms as well as  
19 real-world data, provokes conflicting reactions in the sphere of MTMs. While most informants  
20 expressed scepticism and misgivings, some have also implemented 'home-made' web-based  
21 platforms or were willing to experiment and discover their real potential (e.g., as a supportive tool  
22 indicating patients' risk of local recurrence). Informants identified three main challenges posed by  
23 CDSS. First, CDSS should have safeguards to ensure that decision-making is robust and reproducible.  
24 Lack of trustworthiness was foreseen if CDSS propose treatment strategies based on unknown  
25 criteria or criteria that may not have been clinically validated by a physician. Second, continuous  
26 updates are essential to take into account new scientific evidence and avert obsolete  
27 recommendations. Finally, CDSS must capture clinical complexity (i.e., including dimensions such as  
28 oncogeriatrics) and patient preferences. Currently, there is no shared vision about whether CDSS  
29 should be oriented toward 'simpler' or 'more complex' cases, nor whether a CDSS can include  
30 existing information on open clinical trials.  
31

32  
33  
34  
35  
36  
37  
38  
39  
40 *(6) Provision of patients' genomics information & molecular tumour boards*  
41

42 The emergence of personalised medicine can impact decision-making in MTMs. The idea of  
43 implementing molecular tumour boards (comprised of specialists in genetics, biology, medical  
44 oncology, bioinformatics, and pathology) has emerged due to the complexity of selecting patients  
45 and evaluating different options according to the information provided by next generation  
46 sequencing. But integrating this area into MTMs poses specific challenges beyond the technical  
47 challenges of improving clinical decisions. For one, MTMs must access genomic information, and  
48 hospitals do not always have this technology onsite, making virtual MTMs necessary. Moreover, the  
49 interpretation of genomic information must be consistent with overall therapeutic planning,  
50 including indications for drugs.  
51

52  
53  
54  
55  
56  
57  
58 *(7) Virtual MTMs*  
59  
60

1  
2  
3 Virtual MTMs facilitate regular, multicentre meetings, but informants stressed that virtual MTMs do  
4 not justify delivering treatments in local centres that may not be able to guarantee adequate quality  
5 of care or patients' access to clinical trials. However, they can serve to reach a consensus and  
6 coordinate provision of chemotherapy or patient follow-up in the local centre. Furthermore,  
7 asynchronous MTMs – discussing cases without involving the other institution in real-time – were  
8 seen as problematic; efforts to save time should be focused on making synchronous MTMs more  
9 efficient rather than using an asynchronous model.

10  
11 An inherent problem of virtual MTMs is confidentiality when accessing clinical data in  
12 patients receiving treatment in other hospitals, particularly when local legislation follows the  
13 European General Data Protection Regulation. Some informants reported having to fill in a consent  
14 form in order to communicate and exchange patient information between centres, while others did  
15 not. A few pointed out that an interhospital HIS averts this obstacle. Another example of how to  
16 address this issue is to send a link that is configured to expire within hours to patients' EHRs upon  
17 referral.

### 28 **(c) Recording of decisions and outcome evaluation**

#### 30 *(8) MTM decisions and minutes*

31  
32 Decision-making in MTMs produces information and medical summons for the patient. On the  
33 information side, most team decisions are recorded in the patient's EHR and generally reflected in  
34 the treatment strategy and in other medical decisions. This makes the information accessible in the  
35 hospital context. However, decisions are normally recorded in the same free-text format used for  
36 other data, limiting their subsequent use as information inputs that can be assessed in terms of  
37 clinical outcomes or team performance in the medium to long term. The MTM minutes or reports  
38 synthesise the team's collective reasoning and any potential divergences among its members. They  
39 also follow a free-text format, which was seen as difficult to change considering the need to qualify  
40 decisions and acknowledge discrepancies.

#### 47 *(9) Management of patient appointments*

48  
49 Regardless of the administrative support that MTMs have, patient summons can be facilitated by HIS  
50 that allow agile, real-time management. Ideally, appointment summons generated during the MTM  
51 should be automatically incorporated into the hospital agenda rather than being a pending action  
52 point for after the meeting. Many teams, however, cannot perform this task in situ, increasing the  
53 post-meeting workload.

#### 58 *(10) Evaluation of MDT outcomes*



1  
2  
3 ICTs have had a negligible impact on evaluation of MDT activities and outcomes. It is not unusual to  
4 see the generation of independent Excel files recording MDTs' outcomes — with approval of ethical  
5 committee and ICF of patients —, unconnected from the HIS interface of other operating systems.  
6  
7 These experiences often depend solely on personal efforts, sometimes related to publications; they  
8 are not systematised. Furthermore, the records are usually generated retrospectively, entailing  
9 added work and potential errors. Exceptionally, hospital HIS include evaluation systems that  
10 automatically measure toxicity, stages (I, II...), or other intermediate and outcome indicators. But  
11 these experiences are limited in number. As those functionalities are overwhelmingly related to the  
12 generation of structured data points, they cannot capture the context of free-text records.  
13 Paradoxically, this situation predominates in conventional patient care, while in clinical trials the  
14 activity registries are far more standardised and structured.  
15  
16  
17  
18  
19  
20  
21  
22  
23  
24  
25  
26  
27  
28  
29  
30  
31  
32  
33  
34  
35  
36  
37  
38  
39  
40  
41  
42  
43  
44  
45  
46  
47  
48  
49  
50  
51  
52  
53  
54  
55  
56  
57  
58  
59  
60

## Discussion

This study found 10 ICT/HIS functionalities and ICT-driven care components that to a greater or lesser extent have been adopted and impact MTMs informational and decision-making processes. Our results indicate that ICTs play a key role in opening MTMs to other institutions and departments (by means of virtual MTMs and molecular tumour boards) as well as to patients through data registries that have an impact on these processes in real time (e.g., PROMs). ICTs also contribute to increasing the internal efficiency of teams, for example, through multidisciplinary electronic agendas to draw up patient lists or through structured, personalised case presentations. These technologies are also enabling the use of operating systems intended to improve MTM decisions (e.g., real-world data in CDSS) and contribute to assessing team performance. Although the degree of adoption of ICTs and care components is uneven among different European health systems and there is a high variability,<sup>16</sup> our results showed common trends in digital, dynamic interaction between team members and the larger health ecosystem (beyond the hospital setting), and the integration of patient inputs and support systems as well as from physician-generated information. Globally, this situation paved the way to transform MTM model away from a decision-making process bound within an isolated room, and mark a second transition in the process of MDT development.

That said, our study highlights the low concordance between MDTs' information needs and the adequacy of current IT context. Hospital HIS are still based on reports and clinical services, rather than organised along care processes, and the combination of 'passive' HIS and EHRs – conceived as instruments to store and classify information, not to work with it – plus the massive generation of unstructured data in the form of free-text pdf files, is the clearest expression of this gap. Keen describes this mismatch, noting that while health services are increasingly based on a network model, where health professionals and service managers coordinate multiple services on behalf of patients, many digital services are still being designed in line with a bureaucratic data processing model.<sup>17</sup> Because ICT use may be suboptimal, other authors call for identifying how ICTs can be implemented effectively in multidisciplinary cancer care.<sup>8,18</sup> One example of this misalignment was revealed by a European Society of Radiology survey, which showed that only 44% of the PACS in Europe are connected to a video projector enabling direct visualisation of images during the MTM.<sup>19</sup> Significantly, video conferencing technology and case preparation are among the 10 most-cited factors influencing MTMs' decision-making.<sup>20</sup> In this context, private companies have taken the initiative in developing software platforms to standardise patient data collection and case presentation.

1  
2  
3 While open dialogue continues to be the cornerstone of MTMs, the form of this dialogue is more  
4 and more intertwined with the context. One of the informants recalled that “in the old times we  
5 were just sitting next to each other, discussing the files, looking at the images, and someone was  
6 moderating the session” (table 2). Since the hypothesis arising from our research is that the MTM  
7 model is in transition, it is worth outlining some critical aspects of this emerging model:  
8  
9

10  
11  
12 First, the MTM coordinator, whose overarching role is to manage patient lists and promote clinical  
13 consensus, could also potentially assume functions related to synchronising the team and the  
14 different interfaces (molecular tumour boards, virtual MTM) along with the inputs generated or  
15 facilitated by ICTs (CDSS, PROMs). This figure could also proactively manage the patient agenda, for  
16 instance by validating the stratification of cases proposed by different professionals. This aspect is  
17 especially urgent considering the increasing incidence of malignancies and the evident management  
18 challenges involved in guaranteeing a reasonable time period to discuss clinically complex cases in a  
19 multidisciplinary forum. A Dutch study analysed 105,000 cancer cases to identify pathways for  
20 increasing health system efficiency and proposed stratifying cases in three levels according to the  
21 need for multidisciplinary evaluation.<sup>21</sup>  
22  
23

24  
25  
26 Second, the current proliferation of ICTs and care components in the MTM context requires  
27 rationalisation of their use based on medical criteria – not only technological feasibility. The use of  
28 artificial intelligence (or deep learning) in CDSS illustrates the ethical dilemmas and misgivings that  
29 can arise. As other authors stressed, while discussion remains active on how AI could ‘revolutionise’  
30 healthcare delivery, there is a lack of direction and evidence on how AI could actually benefit  
31 patients.<sup>22</sup>  
32  
33

34  
35  
36 Finally, the transition towards a new MTM model, more connected to its surroundings and capable  
37 of integrating different kinds of information, will lag unless HIS overcome current limitations for  
38 providing structured data, allowing MDTs to assess their performance and outcomes.  
39  
40

41  
42  
43 Additionally, while it is desirable for organisationally and culturally mature MDTs to integrate ICTs  
44 that increase their effectiveness and efficiency, the adoption of ICTs does not preclude professionals’  
45 and MDTs’ need for support. These technologies may generate an additional workload for  
46 professionals, especially when they are being introduced. A data manager or administrative or IT  
47 support should accompany the implementation and use of ICTs, especially when (as observed in our  
48 study) interoperability problems between HIS from different hospitals already impose a heavy  
49 workload. Interhospital referrals and discussions are increasing, buoyed by regionalisation of  
50 services, centralisation policies, and networks that share care processes among different hospitals.  
51  
52  
53 The relevant experience of the European reference networks (ERNs) for rare diseases stand out in  
54  
55  
56  
57  
58  
59  
60

1  
2  
3 this respect, representing a practical model through which teams from different countries share  
4 information and make decisions using an approach fully reliant on ICTs.<sup>23,24</sup>  
5  
6

7 This study has both strengths and limitations. One strength relates to the criteria used to select the  
8 sample, which included interviewees from different specialties and health systems. Moreover, to  
9 avoid social desirability bias, where participants might misrepresent their improvement efforts to  
10 provide desirable answers,<sup>25</sup> we asked informants to describe both positive and negative  
11 experiences when presenting their cases. In the case of ESMO and ESGO, the participants were  
12 selected specifically by the researchers since ESMO do not belong to ECCO and the surgical societies  
13 did not react to the initiative. Regarding the limitations, the small number of participants meant it  
14 was impossible to capture all ICT functionalities and care components being used in MTMs. Also, as  
15 the study was exploratory by nature, we did not achieve data saturation. However, according to  
16 Thompson,<sup>26</sup> data saturation was not a desired outcome in the interpretive description approach  
17 since the focus is on obtaining a deep understanding of participants' perspective while recognizing  
18 that variation in perceptions may exist. Another potential limitation relates to the participant  
19 selection process, based on proposals put forward by each scientific society, which could have  
20 biased selection towards individuals who had had successful experiences.  
21  
22

23  
24  
25  
26  
27  
28  
29  
30  
31 In brief, ICTs and associated care components are transforming informational and decision-making  
32 processes along the three stages of MTM development. Factors driving their introduction include  
33 the increased personalisation required by clinical and care approaches as well as the need for more  
34 efficiency in MTM informational processes. The emerging MTM model is better integrated in the  
35 wider health system context (beyond the hospital setting) and better equipped to incorporate inputs  
36 from patients and support systems, making MTMs more dynamic and interconnected. While these  
37 changes signal a second transition in the development process of MDTs, they are occurring in a  
38 context marked by gaps between MDTs' information and management needs and the adequacy of  
39 current IT systems. This situation needs to change before MDTs can develop their full potential.  
40  
41  
42  
43  
44  
45  
46  
47  
48  
49  
50

## 51 **Acknowledgements**

52 We should like to thank Ricard Price who so unstintingly shared his thoughts with us and supported  
53 the organisation of the study field. Further, we are grateful to Ms. Meggan Harris for her editorial  
54 support.  
55  
56  
57  
58  
59  
60

**Competing interests' statement**

None declared.

**Patient consent for publication**

Not required.

**Contributors**

JP and JMB conceptualised this study. JP and CC wrote the draft, and JMB supervised the manuscript. JP, CC, LDL, KG, EJ, CL, JM, JP, DR, RS, VV and JMB provided intellectual content, edited the manuscript, approved the final version for submission and agree to be accountable for all aspects of the work. JP, CC and JMB managed the overall design of the study.

**Funding Statement**

This work was supported by the Innovative Partnership for Action Against Cancer Joint Action (Grant Agreement number: 801520 — iPAAC — HP-JA-2017), which has received funding from the European Union through the Consumers, Health, Agriculture and Food Executive Agency of the European Commission, in the framework of the Health Programme 2014–2020. This work was also supported by the Agència de Gestió d'Ajuts Universitaris i de Recerca (AGAUR, 2017SGR735), Government of Catalonia, Spain. This institution played no role in the design of the study, collection, analysis and interpretation of data, and in writing the manuscript.

## References

---

- 1 Borrás JM, Albrecht T, Audisio R, *et al*. Policy statement on multidisciplinary cancer care: European Partnership for Action Against Cancer Consensus Group. *Eur J Cancer* 2014;50:475–80.
- 2 Saini KS, Taylor C, Ramirez AJ, *et al*. Role of the multidisciplinary team in breast cancer management: results from a large international survey involving 39 countries. *Annals of Oncology* 2012;23:853–9.
- 3 Prades J, Remue E, van Hoof E, *et al*. Is it worth reorganising cancer services on the basis of multidisciplinary teams (MDTs)? A systematic review of the objectives and organisation of MDTs and their impact on patient outcomes. *Health Policy* 2015;119:464–74.
- 4 Berghmans T, Lievens Y, Aapro M, *et al*. European Cancer Organisation Essential Requirements for Quality Cancer Care (ERQCC): Lung cancer. *Lung Cancer* 2020;150:221–39.
- 5 Andritsch E, Beishon M, Bielack S, *et al*. ECCO Essential Requirements for Quality Cancer Care: Soft Tissue Sarcoma in Adults and Bone Sarcoma. A critical review. *Crit Rev Oncol Hematol* 2017;110:94–105.
- 6 Wilson AR, Marotti L, Bianchi S, *et al*. EUSOMA (European Society of Breast Cancer Specialists). The requirements of a specialist Breast Centre. *Eur J Cancer* 2013;49(17):3579–87.
- 7 Organisation of European Cancer Institutes (OECI) Standards (Accreditation and Designation Programme), 2019. [https://www.oeci.eu/accreditation/Page.aspx?name=OECI\\_STANDARDS](https://www.oeci.eu/accreditation/Page.aspx?name=OECI_STANDARDS)
- 8 Janssen A, Brunner M, Keep M, *et al*. Interdisciplinary eHealth Practice in Cancer Care: A Review of the Literature. *Int J Environ Res Public Health* 2017;14(11):1289.
- 9 Kutikov A, Weinberg DS, Edelman MJ, *et al*. A War on Two Fronts: Cancer Care in the Time of COVID-19. *Ann Intern Med* 2020;172(11):756–758.
- 10 Tepper DL, Burger AP, Weissman MA. Hands Down, COVID-19 Will Change Medical Practice. *Am J Manag Care* 2020;26(9):e274–e275.
- 11 Kitzinger J. Qualitative research. Introducing focus groups. *BMJ* 1995;311(7000):299–302.
- 12 Sofaer S. Qualitative research methods. *Int J Qual Health Care* 2002;14:329e36.
- 13 Miles M, Huberman A. *Qualitative data analysis*. Newbury Park, CA: Sage Publications, 1994.
- 14 Muhr T. *ATLAS.ti 9 for Windows*. Berlin: Scientific Software Development, 2011.
- 15 Tong A, Sainsbury P, Craig J. Consolidated criteria for reporting qualitative research (COREQ): a 32-item checklist for interviews and focus groups. *Int J Qual Health Care* 2007;19:349–57.
- 16 World Health Organisation (WHO). From innovation to implementation. eHealth in the European Region. WHO Regional Office for Europe. Copenhagen Denmark. WHO Regional Office for Europe, 2016. <http://www.euro.who.int/en/ehealth>.
- 17 Keen J. Digital health care: Cementing centralisation? *Health Informatics Journal* 2014;20(3):168–75.
- 18 Janssen A, Robinson T, Brunner M, *et al*. Multidisciplinary teams and ICT: a qualitative study exploring the use of technology and its impact on multidisciplinary team meetings. *BMC Health Serv Res* 2018;18(1):444.
- 19 Neri E, Gabelloni M, Bäuerle T, *et al*. Involvement of radiologists in oncologic multidisciplinary team meetings: an international survey by the European Society of Oncologic Imaging. *Eur Radiol* 2021;31(2):983–91.
- 20 Soukup T, Lamb BW, Arora S, *et al*. Successful strategies in implementing a multidisciplinary team working in the care of patients with cancer: an overview and synthesis of the available literature. *J Multidiscip Healthc* 2018;11:49–61.

1  
2  
3  
4  
5  
6  
7  
8  
9  
10  
11  
12  
13  
14  
15  
16  
17  
18  
19  
20  
21  
22  
23  
24  
25  
26  
27  
28  
29  
30  
31  
32  
33  
34  
35  
36  
37  
38  
39  
40  
41  
42  
43  
44  
45  
46  
47  
48  
49  
50  
51  
52  
53  
54  
55  
56  
57  
58  
59  
60

---

<sup>21</sup> Walraven JEW, Desar IME, Hoeven van der JJM, *et al*. Analysis of 105.000 patients with cancer: have they been discussed in oncologic multidisciplinary team meetings? A nationwide population-based study in the Netherlands. *Eur J Cancer* 2019;121:85–93.

<sup>22</sup> Lau AYS, Staccini P. Artificial Intelligence in Health: New Opportunities, Challenges, and Practical Implications. *Yearb Med Inform* 2019;28(1):174–78.

<sup>23</sup> European Commission, European Reference Networks (ERNs), 2018. [https://ec.europa.eu/health/ern\\_en](https://ec.europa.eu/health/ern_en).

<sup>24</sup> Joint Action on Rare Cancer (JARC). Rare Cancer Agenda 2030 - Ten Recommendations from the EU Joint Action on Rare Cancers, 2018. [https://www.jointactionrarecancers.eu/attachments/article/265/Rare\\_Cancer\\_Agenda\\_2030.pdf](https://www.jointactionrarecancers.eu/attachments/article/265/Rare_Cancer_Agenda_2030.pdf).

<sup>25</sup> Sudman S, Bradburn NM, Schwartz N. *Thinking about answers: the application of cognitive processes to survey methodology*. San Francisco: Jossey-Bass, 1996.

<sup>26</sup> Thompson Burdine J, Thorne S, Sandhu G. Interpretive description: A flexible qualitative methodology for medical education research. *Med Educ* 2021;55(3):336–43.

Supplementary Table 1: COREQ checklist.

| Domain 1: Research team and reflexivity     |                                                                                                                                                                                                                                                                                                                                                                                                                                                                                                                                                                                                                                                                                                      | Location in manuscript (Section, page no.) |
|---------------------------------------------|------------------------------------------------------------------------------------------------------------------------------------------------------------------------------------------------------------------------------------------------------------------------------------------------------------------------------------------------------------------------------------------------------------------------------------------------------------------------------------------------------------------------------------------------------------------------------------------------------------------------------------------------------------------------------------------------------|--------------------------------------------|
| <b>Personal Characteristics</b>             |                                                                                                                                                                                                                                                                                                                                                                                                                                                                                                                                                                                                                                                                                                      |                                            |
| 1. Interviewer/facilitator                  | <i>Which author/s conducted the interview or focus group?</i><br>JP and CC                                                                                                                                                                                                                                                                                                                                                                                                                                                                                                                                                                                                                           | Methods                                    |
| 2. Credentials                              | <i>What were the researcher's credentials?</i><br>JP – MPh, PhD; CC – PhD Candidate; LL – MD; KG – MD; EJ – MD; CL – MD; JM – RN; JP – MD; DR – MD; RS – MD, PhD; VV – MD; JMB – MD, PhD                                                                                                                                                                                                                                                                                                                                                                                                                                                                                                             | -                                          |
| 3. Occupation                               | <i>What was their occupation at the time of the study?</i><br>JP – Senior researcher in cancer healthcare & policy analysis and Associated Professor (Faculty of Medicine, University of Barcelona)<br>CC – Junior researcher in health economics<br>JMB – Director of the Cancer Strategy in Catalonia and Spain and Professor of the Faculty of Medicine (University of Barcelona)<br>CL – Director of the Organisation of European Cancer Institutes (OECI)<br>LL, KG, EJ, JP, DR, RS, VV – Medical doctors in the different specialties they represent (RS, DR and VV are also Head of Service)<br>JM – Nurse specialist in cancer and President of the European Oncology Nursing Society (EONS) | Information partially included in table 1  |
| 4. Gender                                   | <i>Was the researcher male or female?</i><br>Male (n=9) and female (n=3) researchers                                                                                                                                                                                                                                                                                                                                                                                                                                                                                                                                                                                                                 | Title page                                 |
| 5. Experience and training                  | <i>What experience or training did the researcher have?</i><br>The leading researcher (JP) has published a number of studies using qualitative research, including interviews, focus groups (Prades et al, Breast, 2014; Prades et al, HSMR, 2017) and mixed methods approaches (Prades et al, Radiother Oncol, 2017; Prades et al, EJPH, 2016) in biomedical journals, and promoted consensus among experts in different EU initiatives (Prades et al, ESMO Open, 2020; Borrás et al, EJC, 2014). All these studies have been carried out jointly with JMB.                                                                                                                                         | -                                          |
| <b>Relationship with participants</b>       |                                                                                                                                                                                                                                                                                                                                                                                                                                                                                                                                                                                                                                                                                                      |                                            |
| 6. Relationship established                 | <i>Was a relationship established prior to study commencement?</i><br>There was no relationship between the informants and the researchers managing the study (JP, CC and JMB). Relevantly for this study, informants didn't know each other before the study.                                                                                                                                                                                                                                                                                                                                                                                                                                       | -                                          |
| 7. Participant knowledge of the interviewer | <i>What did the participants know about the researcher? e.g. personal goals, reasons for doing</i>                                                                                                                                                                                                                                                                                                                                                                                                                                                                                                                                                                                                   | Methods                                    |



|                                          |                                                                                                                                                                                                                                                                                                                                                                                                                                                                                                                      |            |
|------------------------------------------|----------------------------------------------------------------------------------------------------------------------------------------------------------------------------------------------------------------------------------------------------------------------------------------------------------------------------------------------------------------------------------------------------------------------------------------------------------------------------------------------------------------------|------------|
|                                          | <i>the research.</i><br>Participants in the workshop/focus group were briefed on the purpose of the study through their respective scientific societies. The letter of invitation used to that end was prepared by the researchers and used by the gatekeeper (ECCO). Such information showed the general goal and the requirements to participate, which for instance highlighted the proper professional profiles given the medical (not purely IT) nature of the study.                                           |            |
| 8. Interviewer characteristics           | <i>What characteristics were reported about the interviewer/facilitator? e.g. Bias, assumptions, reasons and interests in the research topic</i><br>The researchers leading the study (JP, CC and JMB) had no direct experience with the topics included in the paper. In order to avoid social desirability bias, where participants might misrepresent their improvement efforts to provide desirable answers, we asked informants to describe both positive and negative experiences when presenting their cases. | Discussion |
| <b>Domain 2: study design</b>            |                                                                                                                                                                                                                                                                                                                                                                                                                                                                                                                      |            |
| <b>Theoretical framework</b>             |                                                                                                                                                                                                                                                                                                                                                                                                                                                                                                                      |            |
| 9. Methodological orientation and Theory | <i>What methodological orientation was stated to underpin the study? e.g. grounded theory, discourse, analysis, ethnography, phenomenology, content analysis</i><br>We used open coding and applied thematic, content analysis.                                                                                                                                                                                                                                                                                      | Methods    |
| <b>Participant selection</b>             |                                                                                                                                                                                                                                                                                                                                                                                                                                                                                                                      |            |
| 10. Sampling                             | <i>How were participants selected? e.g. purposive, convenience, consecutive, Snowball</i><br>Purposive sample including key informants from the most relevant disciplines related to cancer care. Informants were recruited via European scientific societies and ECCO (mentioned above, see 7). Three of them were not able to get involved in focus group and were interviewed individually.                                                                                                                       | Methods    |
| 11. Method of approach                   | <i>How were participants approached? e.g. face-to-face, telephone, mail, email</i><br><br>Informants were designated by the scientific societies to whom they belong. The specific method of approach used by them was blinded to both the gatekeeper and the researchers managing the study.                                                                                                                                                                                                                        | Methods    |
| 12. Sample size                          | <i>How many participants were in the study?</i><br>Nine                                                                                                                                                                                                                                                                                                                                                                                                                                                              | Methods    |
| 13. Non-participation                    | <i>How many people refused to participate or dropped out? Reasons?</i><br>One scientific society did not found the adequate professional profile to be involved in the study.                                                                                                                                                                                                                                                                                                                                        | Methods    |
| <b>Setting</b>                           |                                                                                                                                                                                                                                                                                                                                                                                                                                                                                                                      |            |
| 14. Setting of data                      | <i>Where was the data collected? e.g. home, clinic,</i>                                                                                                                                                                                                                                                                                                                                                                                                                                                              | Methods    |

|                                        |                                                                                                                                                                                                                                                                                                                                                             |            |
|----------------------------------------|-------------------------------------------------------------------------------------------------------------------------------------------------------------------------------------------------------------------------------------------------------------------------------------------------------------------------------------------------------------|------------|
| collection                             | <i>workplace</i><br>Data was collected in a neutral setting, the European CanCer Organisation (ECCO) headquarters in Brussels.                                                                                                                                                                                                                              |            |
| 15. Presence of non-participants       | <i>Was anyone else present besides the participants and researchers?</i><br>No                                                                                                                                                                                                                                                                              | -          |
| 16. Description of sample              | <i>What are the important characteristics of the sample? e.g. demographic data, date</i><br>A multidisciplinary European workshop, lasting approximately 5 hours, was organised on 5 July 2019. Participants belonged to different European scientific societies, countries (Italy, Spain, Belgium, and Croatia) and regional healthcare systems (table 1). | Methods    |
| <b>Data collection</b>                 |                                                                                                                                                                                                                                                                                                                                                             |            |
| 17. Interview guide                    | <i>Were questions, prompts, guides provided by the authors? Was it pilot tested?</i><br>The focus group script (table 3) was never delivered to the informants but the main topics to be dealt with were announced at the beginning of the workshop. The same script was used to conduct the semi-structured interviews.                                    | -          |
| 18. Repeat interviews                  | <i>Were repeat interviews carried out? If yes, how many?</i><br>No                                                                                                                                                                                                                                                                                          | -          |
| 19. Audio/visual recording             | <i>Did the research use audio or visual recording to collect the data?</i><br>The focus group and semi-structured interviews were audio recorded using a digital recorder.                                                                                                                                                                                  | Methods    |
| 20. Field notes                        | <i>Were field notes made during and/or after the interview or focus group?</i><br>The researchers (CC, JP) took field notes during the case study presentations (not the focus group).                                                                                                                                                                      | Methods    |
| 21. Duration                           | <i>What was the duration of the interviews or focus group?</i><br>The focus group lasted 2 hours and the interviews ranged from 46 to 52 minutes.                                                                                                                                                                                                           | -          |
| 22. Data saturation                    | <i>Was data saturation discussed?</i><br>Yes, it is explained why data saturation was neither achieved nor a desired result.                                                                                                                                                                                                                                | Discussion |
| 23. Transcripts returned               | <i>Were transcripts returned to participants for comment and/or correction?</i><br>No                                                                                                                                                                                                                                                                       | -          |
| <b>Domain 3: analysis and findings</b> |                                                                                                                                                                                                                                                                                                                                                             |            |
| <b>Data analysis</b>                   |                                                                                                                                                                                                                                                                                                                                                             |            |
| 24. Number of data coders              | <i>How many data coders coded the data?</i><br>One                                                                                                                                                                                                                                                                                                          | Methods    |
| 25. Description of the coding tree     | <i>Did authors provide a description of the coding tree?</i><br>No                                                                                                                                                                                                                                                                                          | -          |
| 26. Derivation of themes               | <i>Were themes identified in advance or derived from the data?</i><br>Four issues (corresponding to MTM stages) were                                                                                                                                                                                                                                        | Methods    |

|                                  |                                                                                                                                                                                                                                                                                                                                                                                         |         |
|----------------------------------|-----------------------------------------------------------------------------------------------------------------------------------------------------------------------------------------------------------------------------------------------------------------------------------------------------------------------------------------------------------------------------------------|---------|
|                                  | used to organise the discussion, but they had no relation to main focus of research (ICTs and ICT-driven care components).                                                                                                                                                                                                                                                              |         |
| 27. Software                     | <i>What software, if applicable, was used to manage the data?</i><br>Atlas-ti 6.2 and Microsoft Word                                                                                                                                                                                                                                                                                    | Methods |
| 28. Participant checking         | <i>Did participants provide feedback on the findings?</i><br>We just asked to key informants endorsing the results obtained (if agree).                                                                                                                                                                                                                                                 | -       |
| <b>Reporting</b>                 |                                                                                                                                                                                                                                                                                                                                                                                         |         |
| 29. Quotations presented         | <i>Were participant quotations presented to illustrate the themes / findings? Was each quotation identified? e.g. participant number</i><br>We presented quotations (table 2) organised around main topics. Since the number of participants was limited, we did not identify each one.                                                                                                 | Methods |
| 30. Data and findings consistent | <i>Was there consistency between the data presented and the findings?</i><br>Yes                                                                                                                                                                                                                                                                                                        | Methods |
| 31. Clarity of major themes      | <i>Were major themes clearly presented in the findings?</i><br>Yes                                                                                                                                                                                                                                                                                                                      | Results |
| 32. Clarity of minor themes      | <i>Is there a description of diverse cases or discussion of minor themes?</i><br>Yes. We presented all ICTs and ICT-driven care components found in MTMs' work. Some of them were said to be mostly adopted while other scarcely adopted. However, we did not intend to evaluate the degree of their adoption but which ones were used in clinical practice and the related challenges. | Results |

# BMJ Open

## Use of information and communication technologies (ICTs) in cancer multidisciplinary team meetings: An explorative study based on EU healthcare professionals

|                                 |                                                                                                                                                                                                                                                                                                                                                                                                                                                                                                                                                                                                                                           |
|---------------------------------|-------------------------------------------------------------------------------------------------------------------------------------------------------------------------------------------------------------------------------------------------------------------------------------------------------------------------------------------------------------------------------------------------------------------------------------------------------------------------------------------------------------------------------------------------------------------------------------------------------------------------------------------|
| Journal:                        | <i>BMJ Open</i>                                                                                                                                                                                                                                                                                                                                                                                                                                                                                                                                                                                                                           |
| Manuscript ID                   | bmjopen-2021-051181.R1                                                                                                                                                                                                                                                                                                                                                                                                                                                                                                                                                                                                                    |
| Article Type:                   | Original research                                                                                                                                                                                                                                                                                                                                                                                                                                                                                                                                                                                                                         |
| Date Submitted by the Author:   | 26-Oct-2021                                                                                                                                                                                                                                                                                                                                                                                                                                                                                                                                                                                                                               |
| Complete List of Authors:       | Prades, Joan; Catalan Institute of Oncology, Catalan Cancer Strategy Coll-Ortega, Cristina; Catalan Institute of Oncology Dal Lago, Lissandra; Jules Bordet Institute Goffin, Karolien; KU Leuven Javor, Eugen; Bjelovar General Hospital Lombardo, Claudio; Organisation of European Cancer Institutes (OECI) de Munter, Johan; University Hospital Ghent Ponce, Jordi; Bellvitge University Hospital Regge, Daniele; Candiolo Cancer Institute Salazar, Ramón; Catalan Institute of Oncology Valentini, Vincenzo; Fondazione Policlinico Universitario Agostino Gemelli IRCCS Borras, Josep; University of Barcelona, Clinical Sciences |
| <b>Primary Subject Heading</b>: | Health services research                                                                                                                                                                                                                                                                                                                                                                                                                                                                                                                                                                                                                  |
| Secondary Subject Heading:      | Oncology, Qualitative research, Health policy                                                                                                                                                                                                                                                                                                                                                                                                                                                                                                                                                                                             |
| Keywords:                       | ONCOLOGY, HEALTH SERVICES ADMINISTRATION & MANAGEMENT, Information technology < BIOTECHNOLOGY & BIOINFORMATICS, Telemedicine < BIOTECHNOLOGY & BIOINFORMATICS                                                                                                                                                                                                                                                                                                                                                                                                                                                                             |
|                                 |                                                                                                                                                                                                                                                                                                                                                                                                                                                                                                                                                                                                                                           |

SCHOLARONE™  
Manuscripts



I, the Submitting Author has the right to grant and does grant on behalf of all authors of the Work (as defined in the below author licence), an exclusive licence and/or a non-exclusive licence for contributions from authors who are: i) UK Crown employees; ii) where BMJ has agreed a CC-BY licence shall apply, and/or iii) in accordance with the terms applicable for US Federal Government officers or employees acting as part of their official duties; on a worldwide, perpetual, irrevocable, royalty-free basis to BMJ Publishing Group Ltd ("BMJ") its licensees and where the relevant Journal is co-owned by BMJ to the co-owners of the Journal, to publish the Work in this journal and any other BMJ products and to exploit all rights, as set out in our [licence](#).

The Submitting Author accepts and understands that any supply made under these terms is made by BMJ to the Submitting Author unless you are acting as an employee on behalf of your employer or a postgraduate student of an affiliated institution which is paying any applicable article publishing charge ("APC") for Open Access articles. Where the Submitting Author wishes to make the Work available on an Open Access basis (and intends to pay the relevant APC), the terms of reuse of such Open Access shall be governed by a Creative Commons licence – details of these licences and which [Creative Commons](#) licence will apply to this Work are set out in our licence referred to above.

Other than as permitted in any relevant BMJ Author's Self Archiving Policies, I confirm this Work has not been accepted for publication elsewhere, is not being considered for publication elsewhere and does not duplicate material already published. I confirm all authors consent to publication of this Work and authorise the granting of this licence.

1  
2  
3 Use of information and communication technologies (ICTs) in cancer multidisciplinary team  
4 meetings: An explorative study based on EU healthcare professionals  
5

6 Joan Prades<sup>1,11</sup> Cristina Coll-Ortega<sup>1</sup>, Lissandra Dal Lago<sup>2</sup>, Karolien Goffin<sup>3</sup>, Eugen Javor<sup>4</sup>, Claudio  
7 Lombardo<sup>5</sup>, Johan de Munter<sup>6</sup>, Jordi Ponce<sup>7</sup>, Daniele Regge<sup>8</sup>, Ramón Salazar<sup>9</sup>, Vincenzo Valentini<sup>10</sup>,  
8 Josep M. Borrás<sup>1,11</sup>  
9

10  
11  
12 <sup>1</sup> Catalanian Cancer Strategy, Department of Health, Barcelona, Spain  
13

14 <sup>2</sup> Department of Medicine, Institut Jules Bordet, Université Libre de Bruxelles, 1 Rue Héger Bordet, 1000,  
15 Brussels, Belgium, and International Society of Geriatric Oncology (SIOG).  
16

17 <sup>3</sup> Department of Nuclear Medicine, University Hospital Leuven, Division of Nuclear Medicine and Molecular  
18 Imaging, KU Leuven, Leuven, Belgium, and European Association of Nuclear Medicine.  
19

20 <sup>4</sup> Pharmacy Department, General Hospital Bjelovar, Bjelovar, Croatia, and European Society of Oncology  
21 Pharmacy (ESOP).  
22

23 <sup>5</sup> Organisation of European Cancer Institutes (OEI), Rue d'Egmont,11, 1000 Brussels, Belgium, and SOS  
24 Europe, Via B. Bosco 57/9A, 16121, Genova, Italia.  
25

26 <sup>6</sup> Cancer Center, University Hospital Ghent, Ghent, Belgium, and European Oncology Nursing Society, Brussels,  
27 Belgium.  
28

29 <sup>7</sup> University Hospital of Bellvitge, Department of Gynaecology, Barcelona, Spain, University of Barcelona  
30 (IDIBELL) and ExCouncil Member of European Society of Gynaecological Oncology (ESGO)  
31

32 <sup>8</sup> Department of Radiology, Candiolo Cancer Institute, FPO-IRCCS, Candiolo, Italy, Department of Surgical  
33 Sciences, University of Turin, Turin, Italy and Associate Professor in Radiology, University of Torino, Italy and  
34 Europe, and European Society of Radiology (ESR).  
35

36 <sup>9</sup> Institut Català d'Oncologia, Oncobell Program, IDIBELL, CIBERONC, University of Barcelona, L'Hospitalet de  
37 Llobregat, Barcelona, Spain and European Society of Medical Oncology (ESMO).  
38

39 <sup>10</sup> Radiation Oncology and Hematology Department, Fondazione Policlinico Universitario A.Gemelli IRCCS,  
40 Università Cattolica S.Cuore– ROME (I) and European Society for Radiotherapy & Oncology (ESTRO).  
41

42 <sup>11</sup> Department of Clinical Sciences, University of Barcelona (IDIBELL).  
43  
44  
45  
46  
47

48 **Corresponding author:** Joan Prades. Tel.: +34 93 2607417; fax: +34 93 260 73 16. E-mail address:  
49 jprades@iconcologia.net  
50  
51  
52  
53  
54  
55  
56  
57  
58  
59  
60

## Abstract

**Objectives:** Multidisciplinary teams in cancer care are increasingly using information and communication technology (ICT), hospital health information system (HIS) functionalities, and ICT-driven care components. We aimed to explore the use of these tools in multidisciplinary team meetings (MTMs) and to identify the critical challenges posed by their adoption based on the perspective of professionals representatives from European scientific societies.

**Design:** This qualitative study used discussion of cases and focus group technique to generate data. Thematic analysis was applied.

**Setting:** Healthcare professionals working in a multidisciplinary cancer care environment.

**Participants:** Selection of informants was carried out by European scientific societies in accordance with professionals' degree of experience in adopting the implementation of ICT and from different health systems.

**Results:** Professionals representatives of 9 European scientific societies were involved. Up to 10 ICTs, HIS functionalities, and care components are embedded in the informational and decision-making processes along three stages of MTMs. ICTs play a key role in opening MTMs to other institutions (e.g., by means of molecular tumour boards) and information types (e.g. patient-reported outcome measures), and in contributing to the internal efficiency of teams. While ICTs and care components have their own challenges, the information technology context is characterised by the massive generation of unstructured data, the lack of interoperability between systems from different hospitals, and HIS that are conceived to store and classify information rather than to work with it.

**Conclusions:** The emergence of an MTM model that is better integrated in the wider health system context and incorporates inputs from patients and support systems make traditional meetings more dynamic and interconnected. Although these changes signal a second transition in the development process of multidisciplinary teams, they occur in a context marked by clear gaps between the information and management needs of MTMs and the adequacy of current HIS.

### Strengths and limitations of this study

- The paper proposes an exploration of the mostly adopted information and communication technologies (ICTs), hospital health information system (HIS) functionalities, and ICT-driven care components in multidisciplinary team meetings (MTMs).
- A qualitative study was conducted based on key informants from different European scientific societies and health systems.
- Key informants were experienced in adopting the implementation of ICT in MTMs, and this was useful for both case presentation (including unsuccessful practices) and focus group discussion.
- Owing to the explorative nature of the study, it was not possible to capture all ICTs and care components being used in MTMs and this way achieve data saturation.

**Keywords:** Neoplasms, Information Technology, Patient Care Team, Interdisciplinary Communication.

### Data Availability Statement

All data relevant to the study are included in the article or uploaded as supplementary information.



## Introduction

Since the 1990s, multidisciplinary teams (MDTs) for cancer care have improved their internal organisation, increasing the representativeness of the team by including more roles and broadening care objectives and scope of practice to new areas of care (e.g. survivorship care).<sup>1</sup> Although there are pronounced organisational and financial differences between MDTs from different European health systems,<sup>2</sup> all MDTs are characterised by the central role of the multidisciplinary team meeting (MTM) – also referred as tumour board or multidisciplinary cancer conference – as the main decision-making body.<sup>3</sup> These meetings represent a widely recognised standard of care, including in different accreditation and quality systems.<sup>4,5,6,7</sup>

The use of information and communication technologies (ICTs) have taken off in the 21st century, facilitating new modes of MDT interaction and streamlining information management processes.<sup>8</sup> In fact, the potential to transform multidisciplinary cancer care extends beyond typical ICT functionalities like virtual MTMs and telehealth, encompassing the integration of other care components like patient-reported outcome measures (PROMs) and clinical decision support systems (CDSS) into hospitals' ICT and health information systems (HIS). The adoption of ehealth practice is generally modest and uneven between different European health systems, and unsuccessful experiences are not unheard of; however, the qualitative leap in the use of ICTs – clearly accelerated by the COVID-19 pandemic<sup>9,10</sup> – and associated care components raises the question of whether MDTs are undergoing a second transition.

The European Commission's Innovative Partnership for Action Against Cancer (iPAAC) Joint Action, defined as a priority the issue of how ICTs affect the daily work of cancer MDTs, an ambitious endeavour that was tackled in collaboration with the European scientific societies. In this study, we explored the set of ICTs, HIS-based functionalities, and associated care components used by MTMs in order to identify the critical challenges posed by their adoption based on the perspective of professionals representatives from European scientific societies.

## Methods

### *Study design and setting*

Health professionals' perspectives on the use of ICTs, HIS, and associated care components in cancer MTMs were analysed by qualitative methodology. A multidisciplinary European workshop, lasting approximately 5 hours, was organised on 5 July 2019 in a neutral setting (European CanCer Organisation (ECCO) headquarters in Brussels). The workshop was divided in two phases. In the first, each professional presented a prepared case study based on their local experience and healthcare system. The contrasts sparked discussions about the adoption and practices of ICT-led informational and clinical decision-making processes embedded in MTMs. Secondly, focus groups were used to explore the opinions and normative systems through group interactions<sup>11</sup> from the perspective of each medical discipline, which brought to light conceptual-based reflections and knowledge about the relevance of the different ICTs, HIS functionalities, and ICT-driven care components.

### *Selection of informants and sampling strategy*

The workshop was co-organised between the Catalan Institute of Oncology (ICO) and ECCO within the framework of the iPAAC Joint Action. ECCO played a gatekeeper role in the selection of key informants, sending a letter of invitation prepared by the researchers to different European scientific societies and explaining the reasons for the study. For selection of informants and composition of the purposive sample, informants were designated by the scientific societies according to four inclusion criteria: (1) representing the diagnosis and treatment perspectives and including other relevant issues in cancer care (e.g., oncogeriatrics); (2) experienced in leading and/or adopting the implementation of ICT; (3) working in a multidisciplinary cancer care environment; and (4) from different healthcare areas and European health systems. The exclusion criterion, emphasised by ECCO when contacting the different societies, consisted of avoiding the participation of experts in medical technologies or ICTs exclusively from a technical point of view. Clinical reasoning on ICTs rather than focusing on technologies themselves was the critical aspect of the selection. Guidance on group size is common and seldom goes beyond a minimum of 4 and a maximum of 12,<sup>12</sup> but we restricted this number to 10 in order to make it manageable. 9 professionals from different European scientific societies and from 4 health systems, including the Organisation of European Cancer Institutes, were finally enrolled (table 1). They were included as co-authors of this study.

### *Analysis*

Two researchers conducted the meeting, with one acting as moderator (JP) and the other as observer (CC). A sheet containing information about the study goals and a consent form were

handed out before starting. The researchers (CC, JP) took field notes during the case study presentations. Spontaneous interaction was encouraged during the focus group session, which was recorded and transcribed verbatim. Researchers checked for consistency between the recording and text and conducted the subsequent analysis. Four issues (corresponding to MTM stages) were used to organise the discussion: patient data collection and accessibility, case presentation, results and implications of MTMs discussions, and virtual MTMs (table 2).

To analyse the data, we applied thematic analysis criteria, which emphasise the meaning of the text and interpret its thematic content.<sup>13,14</sup> We read through the transcript to identify general themes and specific categories within the themes, ensuring interpreter consensus. Only one researcher coded the data (JP). The research process was inductive, with a constant effort to capture ICTs and other care components related to MTMs, along with their implications and challenges. Figure 1 presents the themes in the form of a coding tree chart. Atlas-ti 6.2 software<sup>15</sup> was used to systematically code and analyse data: all textual data were indexed and co-occurring codes identified. However, the software was used in a limited way to rearrange the data, construct charts, and find associations between themes. Preliminary results were discussed amongst the research team (JP,CC,JMB). The initial draft was then widely circulated among workshop participants for final approval. This study was carried out in agreement with the procedures in consolidated criteria for reporting qualitative research (COREQ).<sup>16</sup>

#### *Patient and Public Involvement*

No patient involved.

**Table 1.** Affiliations of the nine professionals that took part in the workshop

| Organisation                                         | Country      | Profession                                    | Sex    | Years of experience |
|------------------------------------------------------|--------------|-----------------------------------------------|--------|---------------------|
| European Society of Radiology (ESR)                  | Italy        | Radiologist                                   | Male   | 33                  |
| European Association of Nuclear Medicine (EANM)      | Belgium      | Nuclear medicine physician                    | Female | 9                   |
| European Oncology Nursing Society (EONS)             | Belgium      | Oncology nursing                              | Male   | 21                  |
| European Society of Oncology Pharmacy (ESOP)         | Croatia      | Clinical pharmacy specialist                  | Male   | 6                   |
| International Society of Geriatric Oncology (SIOG)   | Belgium      | Medical oncologist                            | Female | 15                  |
| Organisation of European Cancer Institutes (OECI)    | Pan-European | Manager of international health organisations | Male   | 45                  |
| European Society for Radiotherapy & Oncology (ESTRO) | Italy        | Radiation oncologist                          | Male   | n/a                 |
| European Society of Medical Oncology (ESMO)          | Spain        | Medical oncologist                            | Male   | 22                  |
| European Society of Gynaecological Oncology (ESGO)   | Spain        | Gynaecologist and obstetrician                | Male   | 30                  |

**Table 2.** Cancer multidisciplinary team meetings (MTMs) and ICTs: focus group script**1. Data collection and accessibility**

How are the patients' lists drawn up?

How is patient information collected (sources; use of Electronic Health Record, EHRs)?

Are non-tumour specific issues (such as psychooncology or oncogeriatrics) captured? How?

Is the case presentation structured (e.g., on the basis of a template)? Is it electronically linked to the hospital HIS or prepared on a separate file?

**2. Patient case presentation and decision-making**

How is the case presented? What information is it based on?

Are pre-treatment digitised images required in the MTMs? What quality criteria are used, if any, and what display problems have you encountered? What interoperability exists with other institutions and IT systems integration (i.e., degree of standardisation)?

What are the technological conditions (e.g., high-definition projector; double-screen; PCs in the room)?

Describe the use of PROMs/CDSS (i.e., layers of information like protocols; technology at the frontline).

**3. Results and implications of MTMs discussions**

Are the minutes of the MTM available and accessible?

Are decisions recorded on the EHR?

How are medical appointments organised?

How team results are assessed using HIS (e.g., toxicity, QoL issues; MTMs information as output)?

Are MTM decisions and clinical outcomes (real-world data) connected to/feeding AI systems?

**4. Virtual MTMs**

What is your experience with virtual MTMs? What challenges are associated with them?

Types: "expert" and "non-expert" teams; communication between expert teams; etc.

How virtual MTMs are organised and implemented (engagement of dispersed members, specialists, GPs)?

Interoperability, privacy and confidentiality of patient data issues

How reliable is the technology? What difficulties exist, if any, in using technology outside a single organisation (e.g., virtual consultation of tests)?

*Abbreviations:* CDSS: clinical decision support system; EHR: electronic health record; HIS: health information system; PC: personal computer; PROM: patient-reported outcome measure; QoL: quality of life.

## Results

The results were organised on the basis of four domains that correspond to the three stages of MTM development: (a) preparation and organisation, (b) clinical decision-making process, and (c) recording of decisions and outcome evaluation, while the first presented ( $\alpha$ ) is a transversal domain capturing the contextual perspective. Some quotations from the focus group session are used anonymously in the present paper (table 3).

### **( $\alpha$ ) Clinical data and information technology (IT) contextual factors**

Accessible information about cases under discussion in the MTM is essential for agile decision-making. Three elements of the IT context determine the degree of integration, data structuring, and standardised collection of medical information.

#### *Hospital health information system (HIS): the logic of independent repositories*

The informational processes related to MDTs' activity are largely shaped by the hospital HIS, which is not generally structured around patient care processes but rather around the inputs from different functions or sub-systems of each clinical service (e.g., Pathology). This means that data collection is performed through independent repositories from which different inputs are extracted in order to draw up a summary of a patient's case and discuss it in the MTM. Several informants noted the inherent contrast with MDTs, which are cross-sectional by nature and represent care processes in and of themselves (e.g., patients with colon cancer), not just a single specialty, service, or care episode. Even though electronic health records (EHRs) link different information sources and can be practical enough to use during the MTM, they do not arrange all of the elements relevant to a patient's diagnosis and treatment in a specific and integrated way.

#### *Free-text and pdf formats and the applicability of medical information*

Generally, medical information is not recorded through a single computer system from which it can be extracted or modified in a structured way. Much of the information is in a free-text format, predominantly physician-dependent and captured in a pdf, which is difficult to code, use, and access. In contrast, if the data records are electronically structured — as demonstrated for breast cancer during the workshop, ICTs/HIS can potentially change how all the available information is collected and visualised during the MTM presentation.

#### *Standardisation of interhospital informational processes*

Another factor — which may represent the most time-consuming part of MTM preparation — is obtaining information for patients referred from other hospitals. IT systems from different hospitals

1  
2  
3 are rarely integrated or standardised, so patients are often referred with low-quality images, images  
4 that do not meet specific requirements, and even with CD-ROMs, prompting the need for repeating  
5 tests. Professionals need to obtain the original information, not just the summary, and they cannot  
6 diagnose without downloading the original images in the system to review them properly. The lack  
7 of standardisation in the exchange of images causes important delays in decision-making, and in  
8 medical specialties applying ionising radiation, this repetition is problematic because it can be  
9 harmful to patients' health. Instead, when different hospitals agree to use a common HIS, and  
10 therefore the same EHRs for patients, referring patients does not imply any special obstacles.

### 17 **(a) Preparation and organisation of the MTM**

#### 18 *(1) Multidisciplinary electronic patient agenda and patients' stratification*

21 Using a multidisciplinary electronic patient agenda to draw up patient lists helps MDTs to better  
22 anticipate and rapidly manage case discussions. Professionals wishing to discuss a case on the MTM  
23 reserve a time slot for a consultation using the hospital HIS in the same way they would do so for an  
24 appointment with any other hospital service. This way, all the professionals can see the list of  
25 patients to discuss in real time and then prepare for the meeting accordingly (i.e., patients with  
26 pending diagnostic tests results may be removed from the list). Nevertheless, informants stressed  
27 that such automation is limited in most MDTs, with no computer system used. Typically, the MTM  
28 coordinator collects and collates team members' proposals and then distributes them in the form of  
29 a medical chart containing the clinical description of each patient. Professionals also use the  
30 electronic agenda to stratify patients into high and low priority cases, distinguishing between cases  
31 that should be discussed in depth and those that only require confirmation that the treatment  
32 strategy is in line with the guideline. While stratification is informal nowadays, its digitisation would  
33 improve efficiency and organisation of the discussion process, cueing the professionals that only  
34 need to weigh in on a few cases (e.g. reconstructive surgeons, general practitioners, MDT members  
35 accessing remotely) on when they should attend.

#### 47 *(2) Checklist & software for patient case presentation*

49 Some MDTs use templates or checklists to present patient cases, while for others the mode of  
50 presentation depends on individual professionals or is assumed by junior doctors. The qualitative  
51 leap on this point occurs when the hospital HIS (or external software that processes HIS data) is  
52 capable of capturing and integrating all the relevant data that MDTs need to make decisions.  
53 Professionals can then directly narrate what is shown onscreen, not what is summarised in the  
54 medical chart. Structured case presentations have the capacity to improve efficiency,  
55 comprehensiveness, and rigor during the MTM, for example by reserving a specific slot to  
56  
57  
58  
59  
60

1  
2  
3 discuss data on the patient's geriatric situation on the information agenda. However, informants  
4 expressed caution about basing the MTM discussion on rigid checklists and computerised categories,  
5 since it may limit the individualisation and open discussion of every patient.  
6  
7

### 8 9 *(3) Picture Archiving and Communication System (PACS) & imaging display*

10 The PACS workstation is crucial for medical imaging digitalisation and can be used in combination  
11 with a simple software programme to allow MDTs to visualise the images directly on the projector or  
12 screen used in the meeting. This greatly facilitates the presentation of images and contributes to  
13 synchronising the MDT's work; however, not all MTMs have this connection, and the ability to  
14 interpret nuclear medicine images using PACS is limited.  
15  
16  
17  
18

## 19 **(b) Clinical decision-making process**

### 20 21 *(4) Patient-reported outcome measures (PROMs)*

22 Informants believed that PROMs (e.g., a symptoms questionnaire completed by patients) help to  
23 improve decision-making in MTMs by offering real-time data for discussion, reducing delays and re-  
24 discussions. For example, a PROM alert system could warn the MDT that an endometrial cancer  
25 patient is oedematous, triggering cancellation of surgery. Some uncertainty existed about whether  
26 patients should fill in the PROMs questionnaires alone or with assistance (from a health professional  
27 or dedicated software) to help them interpret the questions.  
28  
29  
30  
31  
32  
33  
34

### 35 36 *(5) Artificial intelligence & clinical decision support systems (CDSS)*

37 Artificial intelligence, especially CDSS, which rely on pre-established clinical algorithms as well as  
38 real-world data, provokes conflicting reactions in the sphere of MTMs. While most informants  
39 expressed scepticism and misgivings, some have also implemented 'home-made' web-based  
40 platforms or were willing to experiment and discover their real potential (e.g., as a supportive tool  
41 indicating patients' risk of local recurrence). Informants identified three main challenges posed by  
42 CDSS. First, CDSS should have safeguards to ensure that decision-making is robust and reproducible.  
43 Lack of trustworthiness was foreseen if CDSS propose treatment strategies based on unknown  
44 criteria or criteria that may not have been clinically validated by a physician. Second, continuous  
45 updates are essential to take into account new scientific evidence and avert obsolete  
46 recommendations. Finally, CDSS must capture clinical complexity (i.e., including dimensions such as  
47 oncogeriatrics) and patient preferences. Currently, there is no shared vision about whether CDSS  
48 should be oriented toward 'simpler' or 'more complex' cases, nor whether a CDSS can include  
49 existing information on open clinical trials.  
50  
51  
52  
53  
54  
55  
56  
57  
58

### 59 60 *(6) Provision of patients' genomics information & molecular tumour boards*



1  
2  
3 The emergence of personalised medicine can impact decision-making in MTMs. The idea of  
4 implementing molecular tumour boards (comprised of specialists in genetics, biology, medical  
5 oncology, bioinformatics, and pathology) has emerged due to the complexity of selecting patients  
6 and evaluating different options according to the information provided by next generation  
7 sequencing. But integrating this area into MTMs poses specific challenges beyond the technical  
8 challenges of improving clinical decisions. For one, MTMs must access genomic information, and  
9 hospitals do not always have this technology onsite, making virtual MTMs necessary. Moreover, the  
10 interpretation of genomic information must be consistent with overall therapeutic planning,  
11 including indications for drugs.  
12  
13  
14  
15  
16  
17

#### 18 19 *(7) Virtual MTMs*

20  
21 Virtual MTMs facilitate regular, multicentre meetings, but informants stressed that virtual MTMs do  
22 not justify delivering treatments in local centres that may not be able to guarantee adequate quality  
23 of care or patients' access to clinical trials. However, they can serve to reach a consensus and  
24 coordinate provision of chemotherapy or patient follow-up in the local centre. Furthermore,  
25 asynchronous MTMs – discussing cases without involving the other institution in real-time – were  
26 seen as problematic; efforts to save time should be focused on making synchronous MTMs more  
27 efficient rather than using an asynchronous model.  
28  
29  
30  
31  
32

33 An inherent problem of virtual MTMs is confidentiality when accessing clinical data in  
34 patients receiving treatment in other hospitals, particularly when local legislation follows the  
35 European General Data Protection Regulation. Some informants reported having to fill in a consent  
36 form in order to communicate and exchange patient information between centres, while others did  
37 not. A few pointed out that an interhospital HIS averts this obstacle. Another example of how to  
38 address this issue is to send a link that is configured to expire within hours to patients' EHRs upon  
39 referral.  
40  
41  
42  
43  
44

#### 45 **(c) Recording of decisions and outcome evaluation**

##### 46 47 *(8) MTM decisions and minutes*

48  
49 Decision-making in MTMs produces information and medical summons for the patient. On the  
50 information side, most team decisions are recorded in the patient's EHR and generally reflected in  
51 the treatment strategy and in other medical decisions. This makes the information accessible in the  
52 hospital context. However, decisions are normally recorded in the same free-text format used for  
53 other data, limiting their subsequent use as information inputs that can be assessed in terms of  
54 clinical outcomes or team performance in the medium to long term. The MTM minutes or reports  
55 synthesise the team's collective reasoning and any potential divergences among its members. They  
56  
57  
58  
59  
60



also follow a free-text format, which was seen as difficult to change considering the need to qualify decisions and acknowledge discrepancies.

#### *(9) Management of patient appointments*

Regardless of the administrative support that MTMs have, patient summons can be facilitated by HIS that allow agile, real-time management. Ideally, appointment summons generated during the MTM should be automatically incorporated into the hospital agenda rather than being a pending action point for after the meeting. Many teams, however, cannot perform this task in situ, increasing the post-meeting workload.

#### *(10) Evaluation of MDT outcomes*

ICTs have had a negligible impact on evaluation of MDT activities and outcomes. It is not unusual to see the generation of independent Excel files recording MDTs' outcomes — with approval of ethical committee and informed consent of patients —, unconnected from the HIS interface of other operating systems. These experiences often depend solely on personal efforts, sometimes related to publications; they are not systematised. Furthermore, the records are usually generated retrospectively, entailing added work and potential errors. Exceptionally, hospital HIS include evaluation systems that automatically measure toxicity, stages (I, II...), or other intermediate and outcome indicators. But these experiences are limited in number. As those functionalities are overwhelmingly related to the generation of structured data points, they cannot capture the context of free-text records. Paradoxically, this situation predominates in conventional patient care, while in clinical trials the activity registries are far more standardised and structured.

After analysing the data, the set of ICTs and care components studied was synthesized on the basis of the 4 domains in Fig. 2.

**Table 3.** Verbatim examples for each category.

| <b>Clinical data and IT contextual factors</b>                                                                                                                                                                                                                                                                                                                                                                                                                                                                                                                                                                                                                                                                                               |
|----------------------------------------------------------------------------------------------------------------------------------------------------------------------------------------------------------------------------------------------------------------------------------------------------------------------------------------------------------------------------------------------------------------------------------------------------------------------------------------------------------------------------------------------------------------------------------------------------------------------------------------------------------------------------------------------------------------------------------------------|
| <p>"The Electronic Health Record (EHR) is an evolution from paper, but it is not an integrated information environment."</p> <p>"We're slaves to pdfs. We live in the era of medical information in pdf format. The problem is always finding it and using it."</p> <p>"In my hospital there are a lot of systems and quite often they don't talk to each other. For example, intensive care has a whole different system, so we can't see what patients have behind if they come from this service. You don't see the data; you see the summary."</p> <p>"For some CT scans, we cannot radiate the patient again, so we go all the way to retrieve this information, calling the centres, etc. We do not repeat exams for this reason."</p> |

1  
2  
3  
4  
5  
6  
7  
8  
9  
10  
11  
12  
13  
14  
15  
16  
17  
18  
19  
20  
21  
22  
23  
24  
25  
26  
27  
28  
29  
30  
31  
32  
33  
34  
35  
36  
37  
38  
39  
40  
41  
42  
43  
44  
45  
46  
47  
48  
49  
50  
51  
52  
53  
54  
55  
56  
57  
58  
59  
60

“For haematology, when we ask for whole body PET but some centres just forget and send it partially. And then you have to repeat tests.”

**(a) Preparation and organisation of the MTM**

“We use a template, a structured framework, since junior doctors are in charge of case presentation.”

“In the old times we were just sitting next to each other, discussing the files, looking at the images, and someone was moderating the session”.

“Sometimes we [diagnostician] have to say ‘I’ll give you advice the next day’ and check again at my dedicated work station.”

**(b) Clinical decision-making process**

“The PROMs will be important in the future to make decisions in MTMs. With PROMS the patient is involved in the decision-making process. His/her data is there. It is real time data.”

[On CDSS:] “These systems appear as a black box. You don’t know what studies and data are in the algorithm. People are afraid because of that.”

“AI may help but the model is not pressing a button and a decision is made.

Interaction between drugs is one of the most evident challenges for a CDSS.”

“The MTM includes molecular information based on biomarkers like Ki67 or HER, but which originates in the immunohistochemistry and FISH [Fluorescence In Situ Hybridization test], not in the NGS [Next Generation Sequencing]. We’re still in the clinical era, but a transition has started.”

**(c) Recording of decisions and outcome evaluation**

“From an IT perspective, structured reporting of decisions would be a big change. It’s the clarity that changes, what you don’t find on a free-text report.”

“ICTs are mainly found before making decisions. Afterwards they don’t help us: we don’t have much time to arrange the citations, to follow and monitor patients, to look at the results and so on. This could make a difference in optimising the resources.”

“Sometimes you need something really important for clinical practice and you don’t have it. There is also a lot of unnecessary data.”

## Discussion

This study found 10 ICT/HIS functionalities and ICT-driven care components that to a greater or lesser extent have been adopted and impact MTMs informational and decision-making processes. Our results indicate that ICTs play a key role in opening MTMs to other institutions and departments (by means of virtual MTMs and molecular tumour boards) as well as to patients through data registries that have an impact on these processes in real time (e.g., PROMs). ICTs also contribute to increasing the internal efficiency of teams, for example, through multidisciplinary electronic agendas to draw up patient lists or through structured, personalised case presentations. These technologies are also enabling the use of operating systems intended to improve MTM decisions (e.g., real-world data in CDSS) and contribute to assessing team performance. Although the degree of adoption of ICTs and care components is uneven among different European health systems and there is a high variability,<sup>17</sup> our results showed common trends in digital, dynamic interaction between team members and the larger health ecosystem (beyond the hospital setting), and the integration of patient inputs and support systems as well as from physician-generated information. Globally, this situation paved the way to transform MTM model away from a decision-making process bound within an isolated room, and mark a second transition in the process of MDT development.

That said, our study highlights the low concordance between MDTs' information needs and the adequacy of current IT context. Hospital HIS are still based on reports and clinical services, rather than organised along care processes, and the combination of 'passive' HIS and EHRs – conceived as instruments to store and classify information, not to work with it – plus the massive generation of unstructured data in the form of free-text pdf files, is the clearest expression of this gap. Keen describes this mismatch, noting that while health services are increasingly based on a network model, where health professionals and service managers coordinate multiple services on behalf of patients, many digital services are still being designed in line with a bureaucratic data processing model.<sup>18</sup> Because ICT use may be suboptimal, other authors call for identifying how ICTs can be implemented effectively in multidisciplinary cancer care.<sup>8,19</sup> One example of this misalignment was revealed by a European Society of Radiology survey, which showed that only 44% of the PACS in Europe are connected to a video projector enabling direct visualisation of images during the MTM.<sup>20</sup> Significantly, video conferencing technology and case preparation are among the 10 most-cited factors influencing MTMs' decision-making.<sup>21</sup> In this context, private companies have taken the initiative in developing software platforms to standardise patient data collection and case presentation.

1  
2  
3 While open dialogue continues to be the cornerstone of MTMs, the form of this dialogue is more  
4 and more intertwined with the context. One of the informants recalled that “in the old times we  
5 were just sitting next to each other, discussing the files, looking at the images, and someone was  
6 moderating the session” (table 2). Since the hypothesis arising from our research is that the MTM  
7 model is in transition, it is worth outlining some critical aspects of this emerging model:  
8  
9

10  
11  
12 First, the MTM coordinator, whose overarching role is to manage patient lists and promote clinical  
13 consensus, could also potentially assume functions related to synchronising the team and the  
14 different interfaces (molecular tumour boards, virtual MTM) along with the inputs generated or  
15 facilitated by ICTs (CDSS, PROMs). This figure could also proactively manage the patient agenda, for  
16 instance by validating the stratification of cases proposed by different professionals. This aspect is  
17 especially urgent considering the increasing incidence of malignancies and the evident management  
18 challenges involved in guaranteeing a reasonable time period to discuss clinically complex cases in a  
19 multidisciplinary forum. A Dutch study analysed 105,000 cancer cases to identify pathways for  
20 increasing health system efficiency and proposed stratifying cases in three levels according to the  
21 need for multidisciplinary evaluation.<sup>22</sup>  
22  
23

24  
25  
26 Second, the current proliferation of ICTs and care components in the MTM context requires  
27 rationalisation of their use based on medical criteria – not only technological feasibility. For instance,  
28 the use of artificial intelligence (or deep learning) in CDSS illustrates the ethical dilemmas and  
29 misgivings that can arise. As other authors stressed, while discussion remains active on how AI could  
30 ‘revolutionise’ healthcare delivery, there is a lack of direction and evidence on how AI could actually  
31 benefit patients.<sup>23</sup> The use of ICTs was clearly accelerated during the COVID-19 pandemic. Recent  
32 evaluations in the UK led some authors to suggest that virtual MTMs will be an alternative to face-  
33 to-face meetings and a standard component of future clinical workflows,<sup>24</sup> while others request  
34 caution since quality of the multidisciplinary discussion was hampered.<sup>25</sup>  
35  
36  
37  
38  
39  
40  
41  
42  
43  
44

45  
46 Finally, the transition towards a new MTM model, more connected to its surroundings and capable  
47 of integrating different kinds of information, will lag unless HIS overcome current limitations for  
48 providing structured data, allowing MDTs to assess their performance and outcomes.  
49

50  
51 Additionally, while it is desirable for organisationally and culturally mature MDTs to integrate ICTs  
52 that increase their effectiveness and efficiency, the adoption of ICTs does not preclude professionals’  
53 and MDTs’ need for support. These technologies may generate an additional workload for  
54 professionals, especially when they are being introduced. A data manager or administrative or IT  
55 support should accompany the implementation and use of ICTs, especially when (as observed in our  
56 study) interoperability problems between HIS from different hospitals already impose a heavy  
57  
58  
59  
60

1  
2  
3 workload. Interhospital referrals and discussions are increasing, buoyed by regionalisation of  
4 services, centralisation policies, and networks that share care processes among different hospitals.  
5 The relevant experience of the European reference networks (ERNs) for rare diseases stand out in  
6 this respect, representing a practical model through which teams from different countries share  
7 information and make decisions using an approach fully reliant on ICTs.<sup>26,27</sup>  
8  
9

10  
11  
12 This study has both strengths and limitations. One strength relates to the criteria used to select the  
13 sample, which included interviewees from different specialties and health systems. Moreover, to  
14 avoid social desirability bias, where participants might misrepresent their improvement efforts to  
15 provide desirable answers,<sup>28</sup> we asked informants to describe both positive and negative  
16 experiences when presenting their cases. In the case of ESMO and ESGO, the participants were  
17 selected specifically by the researchers since ESMO do not belong to ECCO and the surgical societies  
18 did not react to the initiative. Regarding the limitations, the small number of participants meant it  
19 was impossible to capture all ICT functionalities and care components being used in MTMs. Also, as  
20 the study was exploratory by nature, we did not achieve data saturation. However, according to  
21 Thompson,<sup>29</sup> data saturation was not a desired outcome in the interpretive description approach  
22 since the focus is on obtaining a deep understanding of participants' perspective while recognizing  
23 that variation in perceptions may exist. Another potential limitation relates to the participant  
24 selection process, based on proposals put forward by each scientific society, which could have  
25 biased selection towards individuals who had had successful experiences. Finally, one scientific  
26 society did not found the adequate professional profile to be involved in the study.  
27  
28

29  
30  
31 In brief, ICTs and associated care components are transforming informational and decision-making  
32 processes along the three stages of MTM development. Factors driving their introduction include  
33 the increased personalisation required by clinical and care approaches as well as the need for more  
34 efficiency in MTM informational processes. The emerging MTM model is better integrated in the  
35 wider health system context (beyond the hospital setting) and better equipped to incorporate inputs  
36 from patients and support systems, making MTMs more dynamic and interconnected. While these  
37 changes signal a second transition in the development process of MDTs, they are occurring in a  
38 context marked by gaps between MDTs' information and management needs and the adequacy of  
39 current IT systems. This situation needs to change before MDTs can develop their full potential.  
40  
41  
42  
43  
44  
45  
46  
47  
48  
49  
50  
51  
52  
53  
54  
55  
56  
57  
58  
59  
60

## Acknowledgements

We should like to thank Ricard Price who so unstintingly shared his thoughts with us and supported the organisation of the study field. Further, we are grateful to Ms. Meggan Harris for her editorial support.

## Competing interests' statement

None declared.

## Patient consent for publication

Not required.

## Contributors

JP and JMB conceptualised this study. JP and CC wrote the draft, and JMB supervised the manuscript. JP, CC, LDL, KG, EJ, CL, JM, JP, DR, RS, VV and JMB provided intellectual content, edited the manuscript, approved the final version for submission and agree to be accountable for all aspects of the work. JP, CC and JMB managed the overall design of the study.

## Funding Statement

This work was supported by the Innovative Partnership for Action Against Cancer Joint Action (Grant Agreement number: 801520 — iPAAC — HP-JA-2017), which has received funding from the European Union through the Consumers, Health, Agriculture and Food Executive Agency of the European Commission, in the framework of the Health Programme 2014–2020. This work was also supported by the Agència de Gestió d'Ajuts Universitaris i de Recerca (AGAUR, 2017SGR735), Government of Catalonia, Spain. This institution played no role in the design of the study, collection, analysis and interpretation of data, and in writing the manuscript.

**Figure 1.** Coding tree for thematic analysis

**Figure 2.** ICTs and care components used during the MTM stages

**Note:** The column on the right defines the three stages (a-b-c) of informational and decision-making processes related to MTMs, from preparation to outcome evaluation. The ICT/HIS functionalities (left column) and ICTs-driven care components (central column) are shown stage-by-stage. The contextual factors are displayed at the top as a transversal domain.

1  
2  
3 **Ethics Statement**  
4

5 This study involves human participants but was not approved by an Ethics Committee(s) or  
6 Institutional Board(s).  
7  
8  
9  
10  
11  
12  
13  
14  
15  
16  
17  
18  
19  
20  
21  
22  
23  
24  
25  
26  
27  
28  
29  
30  
31  
32  
33  
34  
35  
36  
37  
38  
39  
40  
41  
42  
43  
44  
45  
46  
47  
48  
49  
50  
51  
52  
53  
54  
55  
56  
57  
58  
59  
60

For peer review only

## References

- 
- <sup>1</sup> Borrás JM, Albrecht T, Audisio R, *et al.* Policy statement on multidisciplinary cancer care: European Partnership for Action Against Cancer Consensus Group. *Eur J Cancer* 2014;50:475–80.
- <sup>2</sup> Saini KS, Taylor C, Ramirez AJ, *et al.* Role of the multidisciplinary team in breast cancer management: results from a large international survey involving 39 countries. *Annals of Oncology* 2012;23:853–9.
- <sup>3</sup> Prades J, Remue E, van Hoof E, *et al.* Is it worth reorganising cancer services on the basis of multidisciplinary teams (MDTs)? A systematic review of the objectives and organisation of MDTs and their impact on patient outcomes. *Health Policy* 2015;119:464–74.
- <sup>4</sup> Berghmans T, Lievens Y, Aapro M, *et al.* European Cancer Organisation Essential Requirements for Quality Cancer Care (ERQCC): Lung cancer. *Lung Cancer* 2020;150:221–39.
- <sup>5</sup> Andritsch E, Beishon M, Bielack S, *et al.* ECCO Essential Requirements for Quality Cancer Care: Soft Tissue Sarcoma in Adults and Bone Sarcoma. A critical review. *Crit Rev Oncol Hematol* 2017;110:94–105.
- <sup>6</sup> Wilson AR, Marotti L, Bianchi S, *et al.* EUSOMA (European Society of Breast Cancer Specialists). The requirements of a specialist Breast Centre. *Eur J Cancer* 2013;49(17):3579–87.
- <sup>7</sup> Organisation of European Cancer Institutes (OECI) Standards (Accreditation and Designation Programme), 2019. [https://www.oeci.eu/accreditation/Page.aspx?name=OECI\\_STANDARDS](https://www.oeci.eu/accreditation/Page.aspx?name=OECI_STANDARDS)
- <sup>8</sup> Janssen A, Brunner M, Keep M, *et al.* Interdisciplinary eHealth Practice in Cancer Care: A Review of the Literature. *Int J Environ Res Public Health* 2017;14(11):1289.
- <sup>9</sup> Kutikov A, Weinberg DS, Edelman MJ, *et al.* A War on Two Fronts: Cancer Care in the Time of COVID-19. *Ann Intern Med* 2020;172(11):756–758.
- <sup>10</sup> Tepper DL, Burger AP, Weissman MA. Hands Down, COVID-19 Will Change Medical Practice. *Am J Manag Care* 2020;26(9):e274–e275.
- <sup>11</sup> Kitzinger J. Qualitative research. Introducing focus groups. *BMJ* 1995;311(7000):299–302.
- <sup>12</sup> Carlsen B, Glenton C. What about N? A methodological study of sample-size reporting in focus group studies. *BMC Med Res Methodol* 2011;11:26.
- <sup>13</sup> Sofaer S. Qualitative research methods. *Int J Qual Health Care* 2002;14:329e36.
- <sup>14</sup> Miles M, Huberman A. *Qualitative data analysis*. Newbury Park, CA: Sage Publications, 1994.
- <sup>15</sup> Muhr T. *ATLAS.ti 9 for Windows*. Berlin: Scientific Software Development, 2011.
- <sup>16</sup> Tong A, Sainsbury P, Craig J. Consolidated criteria for reporting qualitative research (COREQ): a 32-item checklist for interviews and focus groups. *Int J Qual Health Care* 2007;19:349–57.
- <sup>17</sup> World Health Organisation (WHO). From innovation to implementation. eHealth in the European Region. WHO Regional Office for Europe. Copenhagen Denmark. WHO Regional Office for Europe, 2016. <http://www.euro.who.int/en/ehealth>.
- <sup>18</sup> Keen J. Digital health care: Cementing centralisation? *Health Informatics Journal* 2014;20(3):168–75.
- <sup>19</sup> Janssen A, Robinson T, Brunner M, *et al.* Multidisciplinary teams and ICT: a qualitative study exploring the use of technology and its impact on multidisciplinary team meetings. *BMC Health Serv Res* 2018;18(1):444.
- <sup>20</sup> Neri E, Gabelloni M, Bäuerle T, *et al.* Involvement of radiologists in oncologic multidisciplinary team meetings: an international survey by the European Society of Oncologic Imaging. *Eur Radiol* 2021;31(2):983–91.



- 1  
2  
3
- 
- 4 <sup>21</sup> Soukup T, Lamb BW, Arora S, *et al.* Successful strategies in implementing a multidisciplinary team working in  
5 the care of patients with cancer: an overview and synthesis of the available literature. *J Multidiscip Healthc*  
6 2018;11:49-61.
- 7  
8 <sup>22</sup> Walraven JEW, Desar IME, Hoeven van der JJM, *et al.* Analysis of 105.000 patients with cancer: have they  
9 been discussed in oncologic multidisciplinary team meetings? A nationwide population-based study in the  
10 Netherlands. *Eur J Cancer* 2019;121:85–93.
- 11  
12 <sup>23</sup> Lau AYS, Staccini P. Artificial Intelligence in Health: New Opportunities, Challenges, and Practical  
13 Implications. *Yearb Med Inform* 2019;28(1):174–78.
- 14 <sup>24</sup> Sidpra J, Chhabda S, Gaier C, *et al.* Virtual multidisciplinary team meetings in the age of COVID-19: an  
15 effective and pragmatic alternative. *Quant Imaging Med Surg* 2020;10(6):1204–07.
- 16  
17 <sup>25</sup> To N, Bekker HL, Henry K, *et al.* COVID-19 restrictions on multidisciplinary team meeting decision-making:  
18 service evaluation in a major UK cancer centre. *Br J Surg* 2021;108(4):e162–3.
- 19  
20 <sup>26</sup> European Commission, European Reference Networks (ERNs), 2018. [https://ec.europa.eu/health/ern\\_en](https://ec.europa.eu/health/ern_en).
- 21  
22 <sup>27</sup> Joint Action on Rare Cancer (JARC). Rare Cancer Agenda 2030 - Ten Recommendations from the EU Joint  
23 Action on Rare Cancers, 2018.  
24 [https://www.jointactionrarecancers.eu/attachments/article/265/Rare\\_Cancer\\_Agenda\\_2030.pdf](https://www.jointactionrarecancers.eu/attachments/article/265/Rare_Cancer_Agenda_2030.pdf).
- 25  
26 <sup>28</sup> Sudman S, Bradburn NM, Schwartz N. *Thinking about answers: the application of cognitive processes to*  
27 *survey methodology*. San Francisco: Jossey-Bass, 1996.
- 28  
29 <sup>29</sup> Thompson Burdine J, Thorne S, Sandhu G. Interpretive description: A flexible qualitative methodology for  
30 medical education research. *Med Educ* 2021;55(3):336–43.
- 31  
32  
33  
34  
35  
36  
37  
38  
39  
40  
41  
42  
43  
44  
45  
46  
47  
48  
49  
50  
51  
52  
53  
54  
55  
56  
57  
58  
59  
60

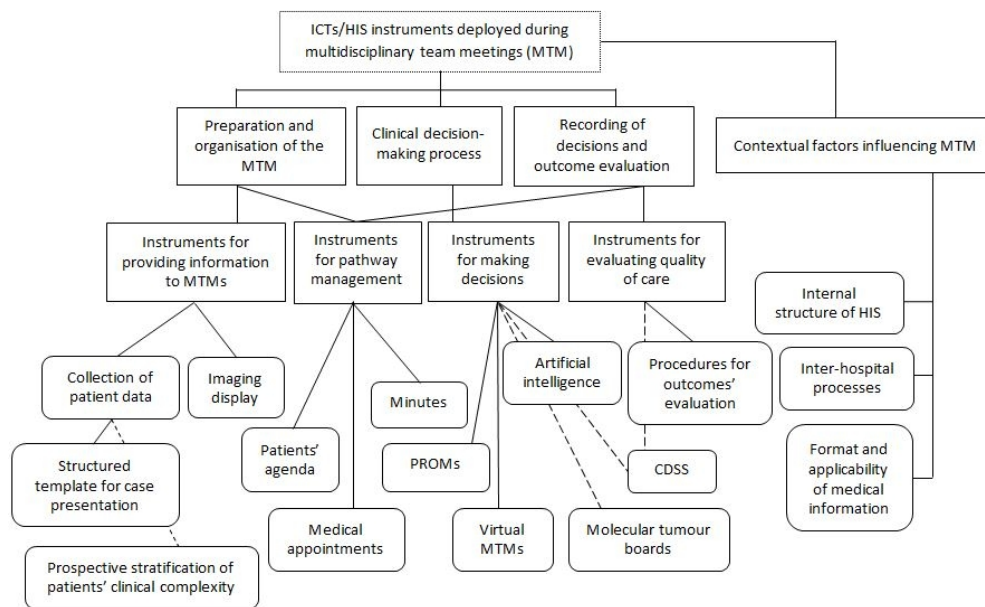

236x146mm (96 x 96 DPI)

1  
2  
3  
4  
5  
6  
7  
8  
9  
10  
11  
12  
13  
14  
15  
16  
17  
18  
19  
20  
21  
22  
23  
24  
25  
26  
27  
28  
29  
30  
31  
32  
33  
34  
35  
36  
37  
38  
39  
40  
41  
42  
43  
44  
45  
46  
47  
48  
49  
50  
51  
52  
53  
54  
55  
56  
57  
58  
59  
60

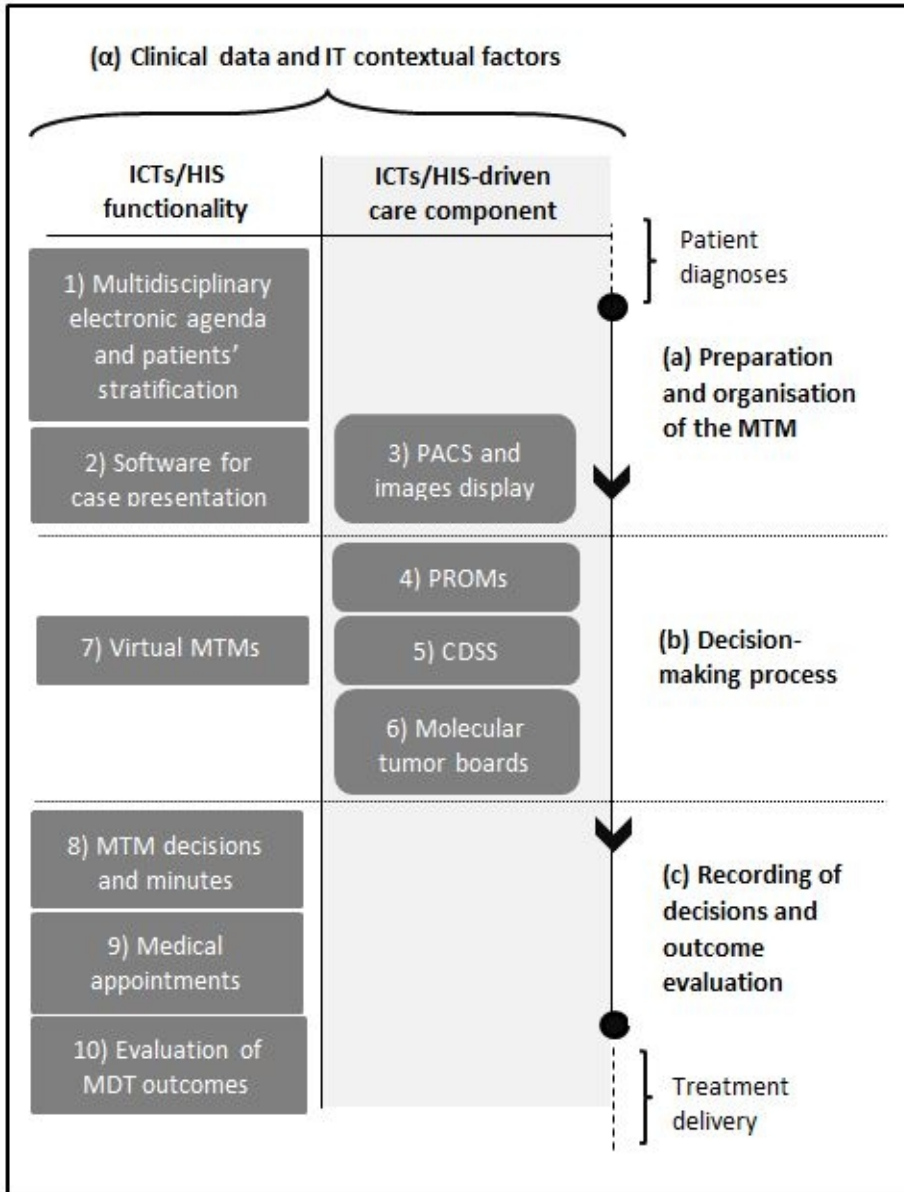

126x165mm (96 x 96 DPI)

Supplementary Table 1: COREQ checklist.

| Domain 1: Research team and reflexivity |                                                                                                                                                                                                                                                                                                                                                                                                                                                                                                                                                                                                                                                                                                                                                                                                                                                                                                                                                                                                                                                                                                                                                    | Location in manuscript (Section, page no.) |
|-----------------------------------------|----------------------------------------------------------------------------------------------------------------------------------------------------------------------------------------------------------------------------------------------------------------------------------------------------------------------------------------------------------------------------------------------------------------------------------------------------------------------------------------------------------------------------------------------------------------------------------------------------------------------------------------------------------------------------------------------------------------------------------------------------------------------------------------------------------------------------------------------------------------------------------------------------------------------------------------------------------------------------------------------------------------------------------------------------------------------------------------------------------------------------------------------------|--------------------------------------------|
| <b>Personal Characteristics</b>         |                                                                                                                                                                                                                                                                                                                                                                                                                                                                                                                                                                                                                                                                                                                                                                                                                                                                                                                                                                                                                                                                                                                                                    |                                            |
| 1. Interviewer/facilitator              | <i>Which author/s conducted the interview or focus group?</i><br>JP, CC, JMB                                                                                                                                                                                                                                                                                                                                                                                                                                                                                                                                                                                                                                                                                                                                                                                                                                                                                                                                                                                                                                                                       | Methods, p. 6.                             |
| 2. Credentials                          | <i>What were the researcher's credentials?</i><br>JP – MPh, PhD; CC – PhD Candidate; LL – MD; KG – MD; EJ – MD; CL – MD; JM – RN; JP – MD; DR – MD; RS – MD, PhD; VV – MD; JMB – MD, PhD                                                                                                                                                                                                                                                                                                                                                                                                                                                                                                                                                                                                                                                                                                                                                                                                                                                                                                                                                           | -                                          |
| 3. Occupation                           | <i>What was their occupation at the time of the study?</i><br>JP – Senior researcher in cancer healthcare & policy analysis and Associated Professor (Faculty of Medicine, University of Barcelona)<br>CC – Junior researcher in health economics<br>JMB – Director of the Cancer Strategy in Catalonia and Spain and Professor of the Faculty of Medicine (University of Barcelona)<br>CL – Director of the Organisation of European Cancer Institutes (OECI)<br>LL, KG, EJ, JP, DR, RS, VV – Medical doctors in the different specialties they represent (RS, DR and VV are also Head of Service)<br>JM – Nurse specialist in cancer and President of the European Oncology Nursing Society (EONS)                                                                                                                                                                                                                                                                                                                                                                                                                                               | Extended information in table 1, p. 6      |
| 4. Gender                               | <i>Was the researcher male or female?</i><br>Male (n=9) and female (n=3) researchers                                                                                                                                                                                                                                                                                                                                                                                                                                                                                                                                                                                                                                                                                                                                                                                                                                                                                                                                                                                                                                                               | Table 1, p. 6                              |
| 5. Experience and training              | <i>What experience or training did the researcher have?</i><br>The leading researcher (JP) has extensive experience in the analysis of multidisciplinary teams, either from the perspective of their design and implementation, their impact on patient outcomes or their relevance as a principal node in cancer networks (e.g., Prades et al, HP, 2014; Prades et al, HSMR, 2017; Prades et al, BMC Public Health, 2011). JP and JMB has published a number of studies using qualitative research, including interviews, focus groups (e.g., those mentioned above and Prades et al, Breast, 2014; Prades et al, Radiother Oncol, 2017; Prades et al, EJPH, 2016) in biomedical journals, and promoted consensus among experts in different EU initiatives (Prades et al, ESMO Open, 2020). Two of these initiatives were devoted specifically to the development of cancer MDT both in Europe (Borras et al, EJC, 2014) and Spain (Guilabert and Prades, JMIR, 2021), the latter being an on-line self-assessment tool for cancer MDTs.<br>CC is a junior health economist that, aside from her experience in healthcare organisation analysis, | -                                          |

|                                             |                                                                                                                                                                                                                                                                                                                                                                                                                                                                                                                                                                                                                                                                                                                                                                                                                                                                                                                                                                                                                                               |                   |
|---------------------------------------------|-----------------------------------------------------------------------------------------------------------------------------------------------------------------------------------------------------------------------------------------------------------------------------------------------------------------------------------------------------------------------------------------------------------------------------------------------------------------------------------------------------------------------------------------------------------------------------------------------------------------------------------------------------------------------------------------------------------------------------------------------------------------------------------------------------------------------------------------------------------------------------------------------------------------------------------------------------------------------------------------------------------------------------------------------|-------------------|
|                                             | participated in one of these EU initiatives (Prades et al, ESMO Open, 2020).                                                                                                                                                                                                                                                                                                                                                                                                                                                                                                                                                                                                                                                                                                                                                                                                                                                                                                                                                                  |                   |
| <b>Relationship with participants</b>       |                                                                                                                                                                                                                                                                                                                                                                                                                                                                                                                                                                                                                                                                                                                                                                                                                                                                                                                                                                                                                                               |                   |
| 6. Relationship established                 | <p><i>Was a relationship established prior to study commencement?</i></p> <p>There was no relationship between the informants and the researchers managing the study (JP, CC and JMB). Relevantly for this study, key informants (healthcare professionals) did not know each other before the study.</p>                                                                                                                                                                                                                                                                                                                                                                                                                                                                                                                                                                                                                                                                                                                                     | -                 |
| 7. Participant knowledge of the interviewer | <p><i>What did the participants know about the researcher? e.g. personal goals, reasons for doing the research.</i></p> <p>Participants in the workshop/focus group were briefed on the purpose of the study through their respective scientific societies. The letter of invitation used to that end was prepared by the researchers and used by the gatekeeper (ECCO). Such information showed the general goal and the requirements to participate, which for instance highlighted the proper professional profiles given the medical (not purely IT) nature of the study. <b>Due to the relevant contribution of the participants and their deep involvement (i.e., full-day workshop plus discussion and validation of results), they were invited to co-authorise the paper. However, as detailed in the Contributions, the tasks that they took on never implied the “study conceptualisation”, “writing the draft” or “management of the overall study”, which were assumed exclusively by the research team (JP,CC and JMB).</b></p> | Methods, p. 5     |
| 8. Interviewer characteristics              | <p><i>What characteristics were reported about the interviewer/facilitator? e.g. Bias, assumptions, reasons and interests in the research topic</i></p> <p>The researchers leading the study (JP, CC and JMB) had no direct experience with the topics included in the paper, <b>except for multidisciplinary cancer care.</b> In order to avoid social desirability bias, where participants might misrepresent their improvement efforts to provide desirable answers, we asked informants to describe both positive and negative experiences when presenting their cases.</p>                                                                                                                                                                                                                                                                                                                                                                                                                                                              | Discussion, p. 16 |
| <b>Domain 2: study design</b>               |                                                                                                                                                                                                                                                                                                                                                                                                                                                                                                                                                                                                                                                                                                                                                                                                                                                                                                                                                                                                                                               |                   |
| <b>Theoretical framework</b>                |                                                                                                                                                                                                                                                                                                                                                                                                                                                                                                                                                                                                                                                                                                                                                                                                                                                                                                                                                                                                                                               |                   |
| 9. Methodological orientation and Theory    | <p><i>What methodological orientation was stated to underpin the study? e.g. grounded theory, discourse, analysis, ethnography, phenomenology, content analysis</i></p> <p>We used open coding and applied thematic analysis.</p>                                                                                                                                                                                                                                                                                                                                                                                                                                                                                                                                                                                                                                                                                                                                                                                                             | Methods, p. 6     |
| <b>Participant selection</b>                |                                                                                                                                                                                                                                                                                                                                                                                                                                                                                                                                                                                                                                                                                                                                                                                                                                                                                                                                                                                                                                               |                   |
| 10. Sampling                                | <p><i>How were participants selected? e.g. purposive, convenience, consecutive, Snowball</i></p> <p>Purposive sample including key informants from the</p>                                                                                                                                                                                                                                                                                                                                                                                                                                                                                                                                                                                                                                                                                                                                                                                                                                                                                    | Methods, p. 5     |

|                                  |                                                                                                                                                                                                                                                                                                                                                                          |                       |
|----------------------------------|--------------------------------------------------------------------------------------------------------------------------------------------------------------------------------------------------------------------------------------------------------------------------------------------------------------------------------------------------------------------------|-----------------------|
|                                  | most relevant disciplines related to cancer care. Informants were recruited via European scientific societies and ECCO (mentioned above, see 7). Three of them were not able to get involved in focus group and were interviewed individually.                                                                                                                           |                       |
| 11. Method of approach           | <i>How were participants approached? e.g. face-to-face, telephone, mail, email</i><br><br>Informants were designated by the scientific societies to whom they belong. The specific method of approach used by them was blinded to both the gatekeeper and the researchers managing the study.                                                                            | Methods, p. 5         |
| 12. Sample size                  | <i>How many participants were in the study?</i><br>Nine                                                                                                                                                                                                                                                                                                                  | Methods, p. 5         |
| 13. Non-participation            | <i>How many people refused to participate or dropped out? Reasons?</i><br>One scientific society did not found the adequate professional profile to be involved in the study.                                                                                                                                                                                            | Discussion, p. 16     |
| <b>Setting</b>                   |                                                                                                                                                                                                                                                                                                                                                                          |                       |
| 14. Setting of data collection   | <i>Where was the data collected? e.g. home, clinic, workplace</i><br>Data was collected in a neutral setting, the European CanCer Organisation (ECCO) headquarters in Brussels.                                                                                                                                                                                          | Methods, p. 5         |
| 15. Presence of non-participants | <i>Was anyone else present besides the participants and researchers?</i><br>No.                                                                                                                                                                                                                                                                                          | -                     |
| 16. Description of sample        | <i>What are the important characteristics of the sample? e.g. demographic data, date</i><br>A multidisciplinary European workshop, lasting approximately 5 hours, was organised on 5 July 2019. Participants belonged to different European scientific societies, specialties, countries (Italy, Spain, Belgium, and Croatia) and regional healthcare systems (table 1). | Methods, p. 5         |
| <b>Data collection</b>           |                                                                                                                                                                                                                                                                                                                                                                          |                       |
| 17. Interview guide              | <i>Were questions, prompts, guides provided by the authors? Was it pilot tested?</i><br>The focus group script (table 2) was never delivered to the informants but the main topics to be dealt with were announced at the beginning of the workshop. The same script was used to conduct the semi-structured interviews.                                                 | -                     |
| 18. Repeat interviews            | <i>Were repeat interviews carried out? If yes, how many?</i><br>No.                                                                                                                                                                                                                                                                                                      | -                     |
| 19. Audio/visual recording       | <i>Did the research use audio or visual recording to collect the data?</i><br>The focus group and semi-structured interviews were audio recorded using a digital recorder.                                                                                                                                                                                               | Methods, p.5 and p. 6 |
| 20. Field notes                  | <i>Were field notes made during and/or after the interview or focus group?</i><br>The researchers (CC, JP) took field notes during the case study presentations (not the focus group).                                                                                                                                                                                   | Methods, p. 6         |
| 21. Duration                     | <i>What was the duration of the interviews or focus</i>                                                                                                                                                                                                                                                                                                                  | -                     |

|                                        |                                                                                                                                                                                                                                                                                                                                                                                         |                    |
|----------------------------------------|-----------------------------------------------------------------------------------------------------------------------------------------------------------------------------------------------------------------------------------------------------------------------------------------------------------------------------------------------------------------------------------------|--------------------|
|                                        | <i>group?</i><br>The focus group lasted 2 hours and the interviews ranged from 46 to 52 minutes.                                                                                                                                                                                                                                                                                        |                    |
| 22. Data saturation                    | <i>Was data saturation discussed?</i><br>Yes, it is explained why data saturation was neither achieved nor a desired result.                                                                                                                                                                                                                                                            | Discussion, p. 16. |
| 23. Transcripts returned               | Were transcripts returned to participants for comment and/or correction?<br>No.                                                                                                                                                                                                                                                                                                         | -                  |
| <b>Domain 3: analysis and findings</b> |                                                                                                                                                                                                                                                                                                                                                                                         |                    |
| <b>Data analysis</b>                   |                                                                                                                                                                                                                                                                                                                                                                                         |                    |
| 24. Number of data coders              | <i>How many data coders coded the data?</i><br>One.                                                                                                                                                                                                                                                                                                                                     | Methods, p. 6      |
| 25. Description of the coding tree     | <i>Did authors provide a description of the coding tree?</i><br>No.                                                                                                                                                                                                                                                                                                                     | -                  |
| 26. Derivation of themes               | <i>Were themes identified in advance or derived from the data?</i><br>Our focus was the ICTs and ICT-driven care components, and these findings were derived directly from the data.                                                                                                                                                                                                    | Methods            |
| 27. Software                           | <i>What software, if applicable, was used to manage the data?</i><br>Atlas-ti 6.2 and Microsoft Word                                                                                                                                                                                                                                                                                    | Methods, p. 6      |
| 28. Participant checking               | <i>Did participants provide feedback on the findings?</i><br>The research team (JP, CC, JMB) circulated the initial draft among participants. They made suggestions and proposed changes with regards to the <i>Discussion</i> , and endorsed the <i>Results</i> .                                                                                                                      | Methods, p. 6      |
| <b>Reporting</b>                       |                                                                                                                                                                                                                                                                                                                                                                                         |                    |
| 29. Quotations presented               | <i>Were participant quotations presented to illustrate the themes / findings? Was each quotation identified? e.g. participant number</i><br>We presented quotations (table 3) organised around main topics. Since the number of participants was limited, we did not identify each one.                                                                                                 | Methods, p. 13     |
| 30. Data and findings consistent       | <i>Was there consistency between the data presented and the findings?</i><br>Yes.                                                                                                                                                                                                                                                                                                       | Methods            |
| 31. Clarity of major themes            | Were major themes clearly presented in the findings?<br>Yes.                                                                                                                                                                                                                                                                                                                            | Results            |
| 32. Clarity of minor themes            | <i>Is there a description of diverse cases or discussion of minor themes?</i><br>Yes. We presented all ICTs and ICT-driven care components found in MTMs' work. Some of them were said to be mostly adopted while other scarcely adopted. However, we did not intend to evaluate the degree of their adoption but which ones were used in clinical practice and the related challenges. | Results            |

# BMJ Open

## Use of information and communication technologies (ICTs) in cancer multidisciplinary team meetings: An explorative study based on EU healthcare professionals

|                                 |                                                                                                                                                                                                                                                                                                                                                                                                                                                                                                                                                                                                                                           |
|---------------------------------|-------------------------------------------------------------------------------------------------------------------------------------------------------------------------------------------------------------------------------------------------------------------------------------------------------------------------------------------------------------------------------------------------------------------------------------------------------------------------------------------------------------------------------------------------------------------------------------------------------------------------------------------|
| Journal:                        | <i>BMJ Open</i>                                                                                                                                                                                                                                                                                                                                                                                                                                                                                                                                                                                                                           |
| Manuscript ID                   | bmjopen-2021-051181.R2                                                                                                                                                                                                                                                                                                                                                                                                                                                                                                                                                                                                                    |
| Article Type:                   | Original research                                                                                                                                                                                                                                                                                                                                                                                                                                                                                                                                                                                                                         |
| Date Submitted by the Author:   | 30-Jun-2022                                                                                                                                                                                                                                                                                                                                                                                                                                                                                                                                                                                                                               |
| Complete List of Authors:       | Prades, Joan; Catalan Institute of Oncology, Catalan Cancer Strategy Coll-Ortega, Cristina; Catalan Institute of Oncology Dal Lago, Lissandra; Jules Bordet Institute Goffin, Karolien; KU Leuven Javor, Eugen; Bjelovar General Hospital Lombardo, Claudio; Organisation of European Cancer Institutes (OECI) de Munter, Johan; University Hospital Ghent Ponce, Jordi; Bellvitge University Hospital Regge, Daniele; Candiolo Cancer Institute Salazar, Ramón; Catalan Institute of Oncology Valentini, Vincenzo; Fondazione Policlinico Universitario Agostino Gemelli IRCCS Borras, Josep; University of Barcelona, Clinical Sciences |
| <b>Primary Subject Heading</b>: | Health services research                                                                                                                                                                                                                                                                                                                                                                                                                                                                                                                                                                                                                  |
| Secondary Subject Heading:      | Oncology, Qualitative research, Health policy                                                                                                                                                                                                                                                                                                                                                                                                                                                                                                                                                                                             |
| Keywords:                       | ONCOLOGY, HEALTH SERVICES ADMINISTRATION & MANAGEMENT, Information technology < BIOTECHNOLOGY & BIOINFORMATICS, Telemedicine < BIOTECHNOLOGY & BIOINFORMATICS                                                                                                                                                                                                                                                                                                                                                                                                                                                                             |
|                                 |                                                                                                                                                                                                                                                                                                                                                                                                                                                                                                                                                                                                                                           |

SCHOLARONE™  
Manuscripts





I, the Submitting Author has the right to grant and does grant on behalf of all authors of the Work (as defined in the below author licence), an exclusive licence and/or a non-exclusive licence for contributions from authors who are: i) UK Crown employees; ii) where BMJ has agreed a CC-BY licence shall apply, and/or iii) in accordance with the terms applicable for US Federal Government officers or employees acting as part of their official duties; on a worldwide, perpetual, irrevocable, royalty-free basis to BMJ Publishing Group Ltd ("BMJ") its licensees and where the relevant Journal is co-owned by BMJ to the co-owners of the Journal, to publish the Work in this journal and any other BMJ products and to exploit all rights, as set out in our [licence](#).

The Submitting Author accepts and understands that any supply made under these terms is made by BMJ to the Submitting Author unless you are acting as an employee on behalf of your employer or a postgraduate student of an affiliated institution which is paying any applicable article publishing charge ("APC") for Open Access articles. Where the Submitting Author wishes to make the Work available on an Open Access basis (and intends to pay the relevant APC), the terms of reuse of such Open Access shall be governed by a Creative Commons licence – details of these licences and which [Creative Commons](#) licence will apply to this Work are set out in our licence referred to above.

Other than as permitted in any relevant BMJ Author's Self Archiving Policies, I confirm this Work has not been accepted for publication elsewhere, is not being considered for publication elsewhere and does not duplicate material already published. I confirm all authors consent to publication of this Work and authorise the granting of this licence.

1  
2  
3 Use of information and communication technologies (ICTs) in cancer multidisciplinary team  
4 meetings: An explorative study based on EU healthcare professionals  
5

6 Joan Prades<sup>1,11</sup> Cristina Coll-Ortega<sup>1</sup>, Lissandra Dal Lago<sup>2</sup>, Karolien Goffin<sup>3</sup>, Eugen Javor<sup>4</sup>, Claudio  
7 Lombardo<sup>5</sup>, Johan de Munter<sup>6</sup>, Jordi Ponce<sup>7</sup>, Daniele Regge<sup>8</sup>, Ramón Salazar<sup>9</sup>, Vincenzo Valentini<sup>10</sup>,  
8 Josep M. Borrás<sup>1,11</sup>  
9

10  
11  
12 <sup>1</sup> Catalanian Cancer Strategy, Department of Health, Barcelona, Spain  
13

14 <sup>2</sup> Department of Medicine, Institut Jules Bordet, Université Libre de Bruxelles, 1 Rue Héger Bordet, 1000,  
15 Brussels, Belgium, and International Society of Geriatric Oncology (SIOG).  
16

17 <sup>3</sup> Department of Nuclear Medicine, University Hospital Leuven, Division of Nuclear Medicine and Molecular  
18 Imaging, KU Leuven, Leuven, Belgium, and European Association of Nuclear Medicine.  
19

20 <sup>4</sup> Pharmacy Department, General Hospital Bjelovar, Bjelovar, Croatia, and European Society of Oncology  
21 Pharmacy (ESOP).  
22

23 <sup>5</sup> Organisation of European Cancer Institutes (OEI), Rue d'Egmont,11, 1000 Brussels, Belgium, and SOS  
24 Europe, Via B. Bosco 57/9A, 16121, Genova, Italia.  
25

26 <sup>6</sup> Cancer Center, University Hospital Ghent, Ghent, Belgium, and European Oncology Nursing Society, Brussels,  
27 Belgium.  
28

29 <sup>7</sup> University Hospital of Bellvitge, Department of Gynaecology, Barcelona, Spain, University of Barcelona  
30 (IDIBELL) and ExCouncil Member of European Society of Gynaecological Oncology (ESGO)  
31

32 <sup>8</sup> Department of Radiology, Candiolo Cancer Institute, FPO-IRCCS, Candiolo, Italy, Department of Surgical  
33 Sciences, University of Turin, Turin, Italy and Associate Professor in Radiology, University of Torino, Italy and  
34 Europe, and European Society of Radiology (ESR).  
35

36 <sup>9</sup> Institut Català d'Oncologia, Oncobell Program, IDIBELL, CIBERONC, University of Barcelona, L'Hospitalet de  
37 Llobregat, Barcelona, Spain and European Society of Medical Oncology (ESMO).  
38

39 <sup>10</sup> Radiation Oncology and Hematology Department, Fondazione Policlinico Universitario A.Gemelli IRCCS,  
40 Università Cattolica S.Cuore– ROME (I) and European Society for Radiotherapy & Oncology (ESTRO).  
41

42 <sup>11</sup> Department of Clinical Sciences, University of Barcelona (IDIBELL).  
43  
44  
45  
46  
47

48 **Corresponding author:** Joan Prades. Tel.: +34 93 2607417; fax: +34 93 260 73 16. E-mail address:  
49 jprades@iconcologia.net  
50  
51  
52  
53  
54  
55  
56  
57  
58  
59  
60

## Abstract

**Objectives:** Multidisciplinary teams in cancer care are increasingly using information and communication technology (ICT), hospital health information system (HIS) functionalities, and ICT-driven care components. We aimed to explore the use of these tools in multidisciplinary team meetings (MTMs) and to identify the critical challenges posed by their adoption based on the perspective of professionals representatives from European scientific societies.

**Design:** This qualitative study used discussion of cases and focus group technique to generate data. Thematic analysis was applied.

**Setting:** Healthcare professionals working in a multidisciplinary cancer care environment.

**Participants:** Selection of informants was carried out by European scientific societies in accordance with professionals' degree of experience in adopting the implementation of ICT and from different health systems.

**Results:** Professionals representatives of 9 European scientific societies were involved. Up to 10 ICTs, HIS functionalities, and care components are embedded in the informational and decision-making processes along three stages of MTMs. ICTs play a key role in opening MTMs to other institutions (e.g., by means of molecular tumour boards) and information types (e.g. patient-reported outcome measures), and in contributing to the internal efficiency of teams. While ICTs and care components have their own challenges, the information technology context is characterised by the massive generation of unstructured data, the lack of interoperability between systems from different hospitals, and HIS that are conceived to store and classify information rather than to work with it.

**Conclusions:** The emergence of an MTM model that is better integrated in the wider health system context and incorporates inputs from patients and support systems make traditional meetings more dynamic and interconnected. Although these changes signal a second transition in the development process of multidisciplinary teams, they occur in a context marked by clear gaps between the information and management needs of MTMs and the adequacy of current HIS.

### Strengths and limitations of this study

- The paper proposes an exploration of the mostly adopted information and communication technologies (ICTs), hospital health information system (HIS) functionalities, and ICT-driven care components in multidisciplinary team meetings (MTMs).
- A qualitative study was conducted based on key informants from different European scientific societies and health systems.
- Key informants were experienced in adopting the implementation of ICT in MTMs, and this was useful for both case presentation (including unsuccessful practices) and focus group discussion.
- Owing to the explorative nature of the study, it was not possible to capture all ICTs and care components being used in MTMs and this way achieve data saturation.

**Keywords:** Neoplasms, Information Technology, Patient Care Team, Interdisciplinary Communication.

### Data Availability Statement

All data relevant to the study are included in the article or uploaded as supplementary information.

## Introduction

Since the 1990s, multidisciplinary teams (MDTs) for cancer care have improved their internal organisation, increasing the representativeness of the team by including more roles and broadening care objectives and scope of practice to new areas of care (e.g. survivorship care).<sup>1</sup> Although there are pronounced organisational and financial differences between MDTs from different European health systems,<sup>2</sup> all MDTs are characterised by the central role of the multidisciplinary team meeting (MTM) – also referred as tumour board or multidisciplinary cancer conference – as the main decision-making body.<sup>3</sup> These meetings represent a widely recognised standard of care, including in different accreditation and quality systems.<sup>4,5,6,7</sup>

The use of information and communication technologies (ICTs) have taken off in the 21st century, facilitating new modes of MDT interaction and streamlining information management processes.<sup>8</sup> In fact, the potential to transform multidisciplinary cancer care extends beyond typical ICT functionalities like virtual MTMs and telehealth, encompassing the integration of other care components like patient-reported outcome measures (PROMs) and clinical decision support systems (CDSS) into hospitals' ICT and health information systems (HIS). The adoption of ehealth practice is generally modest and uneven between different European health systems, and unsuccessful experiences are not unheard of; however, the qualitative leap in the use of ICTs – clearly accelerated by the COVID-19 pandemic<sup>9,10</sup> – and associated care components raises the question of whether MDTs are undergoing a second transition.

The European Commission's Innovative Partnership for Action Against Cancer (iPAAC) Joint Action, defined as a priority the issue of how ICTs affect the daily work of cancer MDTs, an ambitious endeavour that was tackled in collaboration with the European scientific societies. In this study, we explored the set of ICTs, HIS-based functionalities, and associated care components used by MTMs in order to identify the critical challenges posed by their adoption based on the perspective of professionals representatives from European scientific societies.

## Methods

### *Study design and setting*

Health professionals' perspectives on the use of ICTs, HIS, and associated care components in cancer MTMs were analysed by qualitative methodology. A multidisciplinary European workshop, lasting approximately 5 hours, was organised on 5 July 2019 in a neutral setting (European CanCer Organisation (ECCO) headquarters in Brussels). The workshop was divided in two phases. In the first, each professional presented a prepared case study based on their local experience and healthcare system. The contrasts sparked discussions about the adoption and practices of ICT-led informational and clinical decision-making processes embedded in MTMs. Secondly, focus groups were used to explore the opinions and normative systems through group interactions<sup>11</sup> from the perspective of each medical discipline, which brought to light conceptual-based reflections and knowledge about the relevance of the different ICTs, HIS functionalities, and ICT-driven care components.

### *Selection of informants and sampling strategy*

The workshop was co-organised between the Catalan Institute of Oncology (ICO) and ECCO within the framework of the iPAAC Joint Action. ECCO played a gatekeeper role in the selection of key informants, sending a letter of invitation prepared by the researchers to different European scientific societies and explaining the reasons for the study. For selection of informants and composition of the purposive sample, informants were designated by the scientific societies according to four inclusion criteria: (1) representing the diagnosis and treatment perspectives and including other relevant issues in cancer care (e.g., oncogeriatrics); (2) experienced in leading and/or adopting the implementation of ICT; (3) working in a multidisciplinary cancer care environment; and (4) from different healthcare areas and European health systems. The exclusion criterion, emphasised by ECCO when contacting the different societies, consisted of avoiding the participation of experts in medical technologies or ICTs exclusively from a technical point of view. Clinical reasoning on ICTs rather than focusing on technologies themselves was the critical aspect of the selection. Guidance on group size is common and seldom goes beyond a minimum of 4 and a maximum of 12,<sup>12</sup> but we restricted this number to 10 in order to make it manageable. 9 professionals from different European scientific societies and from 4 health systems, including the Organisation of European Cancer Institutes, were finally enrolled (table 1). They were included as co-authors of this study.

### *Analysis*

Two researchers conducted the meeting, with one acting as moderator (JP) and the other as observer (CC). A sheet containing information about the study goals and a consent form were

handed out before starting. The researchers (CC, JP) took field notes during the case study presentations. Spontaneous interaction was encouraged during the focus group session, which was recorded and transcribed verbatim. Researchers checked for consistency between the recording and text and conducted the subsequent analysis. Four issues (corresponding to MTM stages) were used to organise the discussion: patient data collection and accessibility, case presentation, results and implications of MTMs discussions, and virtual MTMs (table 2).

To analyse the data, we applied thematic analysis criteria, which emphasise the meaning of the text and interpret its thematic content.<sup>13,14</sup> We read through the transcript to identify general themes and specific categories within the themes, ensuring interpreter consensus. Only one researcher coded the data (JP). The research process was inductive, with a constant effort to capture ICTs and other care components related to MTMs, along with their implications and challenges. Figure 1 presents the themes in the form of a coding tree chart. Atlas-ti 6.2 software<sup>15</sup> was used to systematically code and analyse data: all textual data were indexed and co-occurring codes identified. However, the software was used in a limited way to rearrange the data, construct charts, and find associations between themes. Preliminary results were discussed amongst the research team (JP,CC,JMB). The initial draft was then widely circulated among workshop participants for final approval. This study was carried out in agreement with the procedures in consolidated criteria for reporting qualitative research (COREQ).<sup>16</sup>

#### *Patient and Public Involvement*

No patient involved.

**Table 1.** Affiliations of the nine professionals that took part in the workshop

| Organisation                                         | Country      | Profession                                    | Sex    | Years of experience |
|------------------------------------------------------|--------------|-----------------------------------------------|--------|---------------------|
| European Society of Radiology (ESR)                  | Italy        | Radiologist                                   | Male   | 33                  |
| European Association of Nuclear Medicine (EANM)      | Belgium      | Nuclear medicine physician                    | Female | 9                   |
| European Oncology Nursing Society (EONS)             | Belgium      | Oncology nursing                              | Male   | 21                  |
| European Society of Oncology Pharmacy (ESOP)         | Croatia      | Clinical pharmacy specialist                  | Male   | 6                   |
| International Society of Geriatric Oncology (SIOG)   | Belgium      | Medical oncologist                            | Female | 15                  |
| Organisation of European Cancer Institutes (OECI)    | Pan-European | Manager of international health organisations | Male   | 45                  |
| European Society for Radiotherapy & Oncology (ESTRO) | Italy        | Radiation oncologist                          | Male   | n/a                 |
| European Society of Medical Oncology (ESMO)          | Spain        | Medical oncologist                            | Male   | 22                  |
| European Society of Gynaecological Oncology (ESGO)   | Spain        | Gynaecologist and obstetrician                | Male   | 30                  |

**Table 2.** Cancer multidisciplinary team meetings (MTMs) and ICTs: focus group script**1. Data collection and accessibility**

How are the patients' lists drawn up?

How is patient information collected (sources; use of Electronic Health Record, EHRs)?

Are non-tumour specific issues (such as psychooncology or oncogeriatrics) captured? How?

Is the case presentation structured (e.g., on the basis of a template)? Is it electronically linked to the hospital HIS or prepared on a separate file?

**2. Patient case presentation and decision-making**

How is the case presented? What information is it based on?

Are pre-treatment digitised images required in the MTMs? What quality criteria are used, if any, and what display problems have you encountered? What interoperability exists with other institutions and IT systems integration (i.e., degree of standardisation)?

What are the technological conditions (e.g., high-definition projector; double-screen; PCs in the room)?

Describe the use of PROMs/CDSS (i.e., layers of information like protocols; technology at the frontline).

**3. Results and implications of MTMs discussions**

Are the minutes of the MTM available and accessible?

Are decisions recorded on the EHR?

How are medical appointments organised?

How team results are assessed using HIS (e.g., toxicity, QoL issues; MTMs information as output)?

Are MTM decisions and clinical outcomes (real-world data) connected to/feeding AI systems?

**4. Virtual MTMs**

What is your experience with virtual MTMs? What challenges are associated with them?

Types: "expert" and "non-expert" teams; communication between expert teams; etc.

How virtual MTMs are organised and implemented (engagement of dispersed members, specialists, GPs)?

Interoperability, privacy and confidentiality of patient data issues

How reliable is the technology? What difficulties exist, if any, in using technology outside a single organisation (e.g., virtual consultation of tests)?

*Abbreviations:* CDSS: clinical decision support system; EHR: electronic health record; HIS: health information system; PC: personal computer; PROM: patient-reported outcome measure; QoL: quality of life.



## Results

The results were organised on the basis of four domains that correspond to the three stages of MTM development: (a) preparation and organisation, (b) clinical decision-making process, and (c) recording of decisions and outcome evaluation, while the first presented ( $\alpha$ ) is a transversal domain capturing the contextual perspective. Some quotations from the focus group session are used anonymously in the present paper (table 3).

### **( $\alpha$ ) Clinical data and information technology (IT) contextual factors**

Accessible information about cases under discussion in the MTM is essential for agile decision-making. Three elements of the IT context determine the degree of integration, data structuring, and standardised collection of medical information.

#### *Hospital health information system (HIS): the logic of independent repositories*

The informational processes related to MDTs' activity are largely shaped by the hospital HIS, which is not generally structured around patient care processes but rather around the inputs from different functions or sub-systems of each clinical service (e.g., Pathology). This means that data collection is performed through independent repositories from which different inputs are extracted in order to draw up a summary of a patient's case and discuss it in the MTM. Several informants noted the inherent contrast with MDTs, which are cross-sectional by nature and represent care processes in and of themselves (e.g., patients with colon cancer), not just a single specialty, service, or care episode. Even though electronic health records (EHRs) link different information sources and can be practical enough to use during the MTM, they do not arrange all of the elements relevant to a patient's diagnosis and treatment in a specific and integrated way.

#### *Free-text and pdf formats and the applicability of medical information*

Generally, medical information is not recorded through a single computer system from which it can be extracted or modified in a structured way. Much of the information is in a free-text format, predominantly physician-dependent and captured in a pdf, which is difficult to code, use, and access. In contrast, if the data records are electronically structured — as demonstrated for breast cancer during the workshop, ICTs/HIS can potentially change how all the available information is collected and visualised during the MTM presentation.

#### *Standardisation of interhospital informational processes*

Another factor — which may represent the most time-consuming part of MTM preparation — is obtaining information for patients referred from other hospitals. IT systems from different hospitals

1  
2  
3 are rarely integrated or standardised, so patients are often referred with low-quality images, images  
4 that do not meet specific requirements, and even with CD-ROMs, prompting the need for repeating  
5 tests. Professionals need to obtain the original information, not just the summary, and they cannot  
6 diagnose without downloading the original images in the system to review them properly. The lack  
7 of standardisation in the exchange of images causes important delays in decision-making, and in  
8 medical specialties applying ionising radiation, this repetition is problematic because it can be  
9 harmful to patients' health. Instead, when different hospitals agree to use a common HIS, and  
10 therefore the same EHRs for patients, referring patients does not imply any special obstacles.

### 17 **(a) Preparation and organisation of the MTM**

#### 18 *(1) Multidisciplinary electronic patient agenda and patients' stratification*

21 Using a multidisciplinary electronic patient agenda to draw up patient lists helps MDTs to better  
22 anticipate and rapidly manage case discussions. Professionals wishing to discuss a case on the MTM  
23 reserve a time slot for a consultation using the hospital HIS in the same way they would do so for an  
24 appointment with any other hospital service. This way, all the professionals can see the list of  
25 patients to discuss in real time and then prepare for the meeting accordingly (i.e., patients with  
26 pending diagnostic tests results may be removed from the list). Nevertheless, informants stressed  
27 that such automation is limited in most MDTs, with no computer system used. Typically, the MTM  
28 coordinator collects and collates team members' proposals and then distributes them in the form of  
29 a medical chart containing the clinical description of each patient. Professionals also use the  
30 electronic agenda to stratify patients into high and low priority cases, distinguishing between cases  
31 that should be discussed in depth and those that only require confirmation that the treatment  
32 strategy is in line with the guideline. While stratification is informal nowadays, its digitisation would  
33 improve efficiency and organisation of the discussion process, cueing the professionals that only  
34 need to weigh in on a few cases (e.g. reconstructive surgeons, general practitioners, MDT members  
35 accessing remotely) on when they should attend.

#### 47 *(2) Checklist & software for patient case presentation*

49 Some MDTs use templates or checklists to present patient cases, while for others the mode of  
50 presentation depends on individual professionals or is assumed by junior doctors. The qualitative  
51 leap on this point occurs when the hospital HIS (or external software that processes HIS data) is  
52 capable of capturing and integrating all the relevant data that MDTs need to make decisions.  
53 Professionals can then directly narrate what is shown onscreen, not what is summarised in the  
54 medical chart. Structured case presentations have the capacity to improve efficiency,  
55 comprehensiveness, and rigor during the MTM, for example by reserving a specific slot to  
56  
57  
58  
59  
60

1  
2  
3 discuss data on the patient's geriatric situation on the information agenda. However, informants  
4 expressed caution about basing the MTM discussion on rigid checklists and computerised categories,  
5 since it may limit the individualisation and open discussion of every patient.  
6  
7

### 8 9 *(3) Picture Archiving and Communication System (PACS) & imaging display*

10 The PACS workstation is crucial for medical imaging digitalisation and can be used in combination  
11 with a simple software programme to allow MDTs to visualise the images directly on the projector or  
12 screen used in the meeting. This greatly facilitates the presentation of images and contributes to  
13 synchronising the MDT's work; however, not all MTMs have this connection, and the ability to  
14 interpret nuclear medicine images using PACS is limited.  
15  
16  
17  
18

## 19 **(b) Clinical decision-making process**

### 20 21 *(4) Patient-reported outcome measures (PROMs)*

22 Informants believed that PROMs (e.g., a symptoms questionnaire completed by patients) help to  
23 improve decision-making in MTMs by offering real-time data for discussion, reducing delays and re-  
24 discussions. For example, a PROM alert system could warn the MDT that an endometrial cancer  
25 patient is oedematous, triggering cancellation of surgery. Some uncertainty existed about whether  
26 patients should fill in the PROMs questionnaires alone or with assistance (from a health professional  
27 or dedicated software) to help them interpret the questions.  
28  
29  
30  
31  
32  
33  
34

### 35 36 *(5) Artificial intelligence & clinical decision support systems (CDSS)*

37 Artificial intelligence, especially CDSS, which rely on pre-established clinical algorithms as well as  
38 real-world data, provokes conflicting reactions in the sphere of MTMs. While most informants  
39 expressed scepticism and misgivings, some have also implemented 'home-made' web-based  
40 platforms or were willing to experiment and discover their real potential (e.g., as a supportive tool  
41 indicating patients' risk of local recurrence). Informants identified three main challenges posed by  
42 CDSS. First, CDSS should have safeguards to ensure that decision-making is robust and reproducible.  
43 Lack of trustworthiness was foreseen if CDSS propose treatment strategies based on unknown  
44 criteria or criteria that may not have been clinically validated by a physician. Second, continuous  
45 updates are essential to take into account new scientific evidence and avert obsolete  
46 recommendations. Finally, CDSS must capture clinical complexity (i.e., including dimensions such as  
47 oncogeriatrics) and patient preferences. Currently, there is no shared vision about whether CDSS  
48 should be oriented toward 'simpler' or 'more complex' cases, nor whether a CDSS can include  
49 existing information on open clinical trials.  
50  
51  
52  
53  
54  
55  
56  
57  
58

### 59 60 *(6) Provision of patients' genomics information & molecular tumour boards*

1  
2  
3 The emergence of personalised medicine can impact decision-making in MTMs. The idea of  
4 implementing molecular tumour boards (comprised of specialists in genetics, biology, medical  
5 oncology, bioinformatics, and pathology) has emerged due to the complexity of selecting patients  
6 and evaluating different options according to the information provided by next generation  
7 sequencing. But integrating this area into MTMs poses specific challenges beyond the technical  
8 challenges of improving clinical decisions. For one, MTMs must access genomic information, and  
9 hospitals do not always have this technology onsite, making virtual MTMs necessary. Moreover, the  
10 interpretation of genomic information must be consistent with overall therapeutic planning,  
11 including indications for drugs.  
12  
13  
14  
15  
16  
17

#### 18 19 *(7) Virtual MTMs*

20  
21 Virtual MTMs facilitate regular, multicentre meetings, but informants stressed that virtual MTMs do  
22 not justify delivering treatments in local centres that may not be able to guarantee adequate quality  
23 of care or patients' access to clinical trials. However, they can serve to reach a consensus and  
24 coordinate provision of chemotherapy or patient follow-up in the local centre. Furthermore,  
25 asynchronous MTMs – discussing cases without involving the other institution in real-time – were  
26 seen as problematic; efforts to save time should be focused on making synchronous MTMs more  
27 efficient rather than using an asynchronous model.  
28  
29  
30  
31  
32

33 An inherent problem of virtual MTMs is confidentiality when accessing clinical data in  
34 patients receiving treatment in other hospitals, particularly when local legislation follows the  
35 European General Data Protection Regulation. Some informants reported having to fill in a consent  
36 form in order to communicate and exchange patient information between centres, while others did  
37 not. A few pointed out that an interhospital HIS averts this obstacle. Another example of how to  
38 address this issue is to send a link that is configured to expire within hours to patients' EHRs upon  
39 referral.  
40  
41  
42  
43  
44

#### 45 **(c) Recording of decisions and outcome evaluation**

##### 46 47 *(8) MTM decisions and minutes*

48  
49 Decision-making in MTMs produces information and medical summons for the patient. On the  
50 information side, most team decisions are recorded in the patient's EHR and generally reflected in  
51 the treatment strategy and in other medical decisions. This makes the information accessible in the  
52 hospital context. However, decisions are normally recorded in the same free-text format used for  
53 other data, limiting their subsequent use as information inputs that can be assessed in terms of  
54 clinical outcomes or team performance in the medium to long term. The MTM minutes or reports  
55 synthesise the team's collective reasoning and any potential divergences among its members. They  
56  
57  
58  
59  
60

also follow a free-text format, which was seen as difficult to change considering the need to qualify decisions and acknowledge discrepancies.

#### *(9) Management of patient appointments*

Regardless of the administrative support that MTMs have, patient summons can be facilitated by HIS that allow agile, real-time management. Ideally, appointment summons generated during the MTM should be automatically incorporated into the hospital agenda rather than being a pending action point for after the meeting. Many teams, however, cannot perform this task in situ, increasing the post-meeting workload.

#### *(10) Evaluation of MDT outcomes*

ICTs have had a negligible impact on evaluation of MDT activities and outcomes. It is not unusual to see the generation of independent Excel files recording MDTs' outcomes — with approval of ethical committee and informed consent of patients —, unconnected from the HIS interface of other operating systems. These experiences often depend solely on personal efforts, sometimes related to publications; they are not systematised. Furthermore, the records are usually generated retrospectively, entailing added work and potential errors. Exceptionally, hospital HIS include evaluation systems that automatically measure toxicity, stages (I, II...), or other intermediate and outcome indicators. But these experiences are limited in number. As those functionalities are overwhelmingly related to the generation of structured data points, they cannot capture the context of free-text records. Paradoxically, this situation predominates in conventional patient care, while in clinical trials the activity registries are far more standardised and structured.

After analysing the data, the set of ICTs and care components studied was synthesized on the basis of the 4 domains in Fig. 2.

**Table 3.** Verbatim examples for each category.

| <b>Clinical data and IT contextual factors</b>                                                                                                                                                                                                                                                                                                                                                                                                                                                                                                                                                                                                                                                                                               |
|----------------------------------------------------------------------------------------------------------------------------------------------------------------------------------------------------------------------------------------------------------------------------------------------------------------------------------------------------------------------------------------------------------------------------------------------------------------------------------------------------------------------------------------------------------------------------------------------------------------------------------------------------------------------------------------------------------------------------------------------|
| <p>"The Electronic Health Record (EHR) is an evolution from paper, but it is not an integrated information environment."</p> <p>"We're slaves to pdfs. We live in the era of medical information in pdf format. The problem is always finding it and using it."</p> <p>"In my hospital there are a lot of systems and quite often they don't talk to each other. For example, intensive care has a whole different system, so we can't see what patients have behind if they come from this service. You don't see the data; you see the summary."</p> <p>"For some CT scans, we cannot radiate the patient again, so we go all the way to retrieve this information, calling the centres, etc. We do not repeat exams for this reason."</p> |

1  
2  
3  
4  
5  
6  
7  
8  
9  
10  
11  
12  
13  
14  
15  
16  
17  
18  
19  
20  
21  
22  
23  
24  
25  
26  
27  
28  
29  
30  
31  
32  
33  
34  
35  
36  
37  
38  
39  
40  
41  
42  
43  
44  
45  
46  
47  
48  
49  
50  
51  
52  
53  
54  
55  
56  
57  
58  
59  
60

“For haematology, when we ask for whole body PET but some centres just forget and send it partially. And then you have to repeat tests.”

**(a) Preparation and organisation of the MTM**

“We use a template, a structured framework, since junior doctors are in charge of case presentation.”

“In the old times we were just sitting next to each other, discussing the files, looking at the images, and someone was moderating the session”.

“Sometimes we [diagnostician] have to say ‘I’ll give you advice the next day’ and check again at my dedicated work station.”

**(b) Clinical decision-making process**

“The PROMs will be important in the future to make decisions in MTMs. With PROMS the patient is involved in the decision-making process. His/her data is there. It is real time data.”

[On CDSS:] “These systems appear as a black box. You don’t know what studies and data are in the algorithm. People are afraid because of that.”

“AI may help but the model is not pressing a button and a decision is made.

Interaction between drugs is one of the most evident challenges for a CDSS.”

“The MTM includes molecular information based on biomarkers like Ki67 or HER, but which originates in the immunohistochemistry and FISH [Fluorescence In Situ Hybridization test], not in the NGS [Next Generation Sequencing]. We’re still in the clinical era, but a transition has started.”

**(c) Recording of decisions and outcome evaluation**

“From an IT perspective, structured reporting of decisions would be a big change. It’s the clarity that changes, what you don’t find on a free-text report.”

“ICTs are mainly found before making decisions. Afterwards they don’t help us: we don’t have much time to arrange the citations, to follow and monitor patients, to look at the results and so on. This could make a difference in optimising the resources.”

“Sometimes you need something really important for clinical practice and you don’t have it. There is also a lot of unnecessary data.”

## Discussion

This study found 10 ICT/HIS functionalities and ICT-driven care components that to a greater or lesser extent have been adopted and impact MTMs informational and decision-making processes. Our results indicate that ICTs play a key role in opening MTMs to other institutions and departments (by means of virtual MTMs and molecular tumour boards) as well as to patients through data registries that have an impact on these processes in real time (e.g., PROMs). ICTs also contribute to increasing the internal efficiency of teams, for example, through multidisciplinary electronic agendas to draw up patient lists or through structured, personalised case presentations. These technologies are also enabling the use of operating systems intended to improve MTM decisions (e.g., real-world data in CDSS) and contribute to assessing team performance. Although the degree of adoption of ICTs and care components is uneven among different European health systems and there is a high variability,<sup>17</sup> our results showed common trends in digital, dynamic interaction between team members and the larger health ecosystem (beyond the hospital setting), and the integration of patient inputs and support systems as well as from physician-generated information. Globally, this situation paved the way to transform MTM model away from a decision-making process bound within an isolated room, and mark a second transition in the process of MDT development.

That said, our study highlights the low concordance between MDTs' information needs and the adequacy of current IT context. Hospital HIS are still based on reports and clinical services, rather than organised along care processes, and the combination of 'passive' HIS and EHRs – conceived as instruments to store and classify information, not to work with it – plus the massive generation of unstructured data in the form of free-text pdf files, is the clearest expression of this gap. Keen describes this mismatch, noting that while health services are increasingly based on a network model, where health professionals and service managers coordinate multiple services on behalf of patients, many digital services are still being designed in line with a bureaucratic data processing model.<sup>18</sup> Because ICT use may be suboptimal, other authors call for identifying how ICTs can be implemented effectively in multidisciplinary cancer care.<sup>8,19</sup> One example of this misalignment was revealed by a European Society of Radiology survey, which showed that only 44% of the PACS in Europe are connected to a video projector enabling direct visualisation of images during the MTM.<sup>20</sup> Significantly, video conferencing technology and case preparation are among the 10 most-cited factors influencing MTMs' decision-making.<sup>21</sup> In this context, private companies have taken the initiative in developing software platforms to standardise patient data collection and case presentation.



1  
2  
3 While open dialogue continues to be the cornerstone of MTMs, the form of this dialogue is more  
4 and more intertwined with the context. One of the informants recalled that “in the old times we  
5 were just sitting next to each other, discussing the files, looking at the images, and someone was  
6 moderating the session” (table 2). Since the hypothesis arising from our research is that the MTM  
7 model is in transition, it is worth outlining some critical aspects of this emerging model:  
8  
9

10  
11  
12 First, the MTM coordinator, whose overarching role is to manage patient lists and promote clinical  
13 consensus, could also potentially assume functions related to synchronising the team and the  
14 different interfaces (molecular tumour boards, virtual MTM) along with the inputs generated or  
15 facilitated by ICTs (CDSS, PROMs). This figure could also proactively manage the patient agenda, for  
16 instance by validating the stratification of cases proposed by different professionals. This aspect is  
17 especially urgent considering the increasing incidence of malignancies and the evident management  
18 challenges involved in guaranteeing a reasonable time period to discuss clinically complex cases in a  
19 multidisciplinary forum. A Dutch study analysed 105,000 cancer cases to identify pathways for  
20 increasing health system efficiency and proposed stratifying cases in three levels according to the  
21 need for multidisciplinary evaluation.<sup>22</sup>  
22  
23

24  
25  
26 Second, the current proliferation of ICTs and care components in the MTM context requires  
27 rationalisation of their use based on medical criteria – not only technological feasibility. For instance,  
28 the use of artificial intelligence (or deep learning) in CDSS illustrates the ethical dilemmas and  
29 misgivings that can arise. As other authors stressed, while discussion remains active on how AI could  
30 ‘revolutionise’ healthcare delivery, there is a lack of direction and evidence on how AI could actually  
31 benefit patients.<sup>23</sup> The use of ICTs was clearly accelerated during the COVID-19 pandemic. Recent  
32 evaluations in the UK led some authors to suggest that virtual MTMs will be an alternative to face-  
33 to-face meetings and a standard component of future clinical workflows,<sup>24</sup> while others request  
34 caution since quality of the multidisciplinary discussion was hampered.<sup>25</sup>  
35  
36  
37

38  
39  
40 Finally, the transition towards a new MTM model, more connected to its surroundings and capable  
41 of integrating different kinds of information, will lag unless HIS overcome current limitations for  
42 providing structured data, allowing MDTs to assess their performance and outcomes.  
43  
44

45  
46  
47 Additionally, while it is desirable for organisationally and culturally mature MDTs to integrate ICTs  
48 that increase their effectiveness and efficiency, the adoption of ICTs does not preclude professionals’  
49 and MDTs’ need for support. These technologies may generate an additional workload for  
50 professionals, especially when they are being introduced. A data manager or administrative or IT  
51 support should accompany the implementation and use of ICTs, especially when (as observed in our  
52 study) interoperability problems between HIS from different hospitals already impose a heavy  
53  
54  
55  
56  
57  
58  
59  
60



1  
2  
3 workload. Interhospital referrals and discussions are increasing, buoyed by regionalisation of  
4 services, centralisation policies, and networks that share care processes among different hospitals.  
5 The relevant experience of the European reference networks (ERNs) for rare diseases stand out in  
6 this respect, representing a practical model through which teams from different countries share  
7 information and make decisions using an approach fully reliant on ICTs.<sup>26,27</sup>  
8  
9

10  
11  
12 This study has both strengths and limitations. One strength relates to the criteria used to select the  
13 sample, which included interviewees from different specialties and health systems. Moreover, to  
14 avoid social desirability bias, where participants might misrepresent their improvement efforts to  
15 provide desirable answers,<sup>28</sup> we asked informants to describe both positive and negative  
16 experiences when presenting their cases. In the case of ESMO and ESGO, the participants were  
17 selected specifically by the researchers since ESMO do not belong to ECCO and the surgical societies  
18 did not react to the initiative. Regarding the limitations, the small number of participants meant it  
19 was impossible to capture all ICT functionalities and care components being used in MTMs. Also, as  
20 the study was exploratory by nature, we did not achieve data saturation. However, according to  
21 Thompson,<sup>29</sup> data saturation was not a desired outcome in the interpretive description approach  
22 since the focus is on obtaining a deep understanding of participants' perspective while recognizing  
23 that variation in perceptions may exist. Another potential limitation relates to the participant  
24 selection process, based on proposals put forward by each scientific society, which could have  
25 biased selection towards individuals who had had successful experiences. Finally, one scientific  
26 society did not found the adequate professional profile to be involved in the study.  
27  
28

29  
30  
31 In brief, ICTs and associated care components are transforming informational and decision-making  
32 processes along the three stages of MTM development. Factors driving their introduction include  
33 the increased personalisation required by clinical and care approaches as well as the need for more  
34 efficiency in MTM informational processes. The emerging MTM model is better integrated in the  
35 wider health system context (beyond the hospital setting) and better equipped to incorporate inputs  
36 from patients and support systems, making MTMs more dynamic and interconnected. While these  
37 changes signal a second transition in the development process of MDTs, they are occurring in a  
38 context marked by gaps between MDTs' information and management needs and the adequacy of  
39 current IT systems. This situation needs to change before MDTs can develop their full potential.  
40  
41  
42  
43  
44  
45  
46  
47  
48  
49  
50  
51  
52  
53  
54  
55  
56  
57  
58  
59  
60

## Acknowledgements

We should like to thank Ricard Price who so unstintingly shared his thoughts with us and supported the organisation of the study field. Further, we are grateful to Ms. Meggan Harris for her editorial support.

## Competing interests' statement

None declared.

## Patient consent for publication

Not required.

## Contributors

JP and JMB conceptualised this study. JP and CC wrote the draft, and JMB supervised the manuscript. JP, CC, LDL, KG, EJ, CL, JM, JP, DR, RS, VV and JMB provided intellectual content, edited the manuscript, approved the final version for submission and agree to be accountable for all aspects of the work. JP, CC and JMB managed the overall design of the study.

## Funding Statement

This work was supported by the Innovative Partnership for Action Against Cancer Joint Action (Grant Agreement number: 801520 — iPAAC — HP-JA-2017), which has received funding from the European Union through the Consumers, Health, Agriculture and Food Executive Agency of the European Commission, in the framework of the Health Programme 2014–2020. This work was also supported by the Agència de Gestió d'Ajuts Universitaris i de Recerca (AGAUR, 2017SGR735), Government of Catalonia, Spain. This institution played no role in the design of the study, collection, analysis and interpretation of data, and in writing the manuscript.

**Figure 1.** Coding tree for thematic analysis

**Figure 2.** ICTs and care components used during the MTM stages

**Note:** The column on the right defines the three stages (a-b-c) of informational and decision-making processes related to MTMs, from preparation to outcome evaluation. The ICT/HIS functionalities (left column) and ICTs-driven care components (central column) are shown stage-by-stage. The contextual factors are displayed at the top as a transversal domain.

1  
2  
3 **Ethics Statement**  
4

5 This study involves human participants but was not approved by an Ethics Committee(s) or  
6 Institutional Board(s).  
7  
8  
9  
10  
11  
12  
13  
14  
15  
16  
17  
18  
19  
20  
21  
22  
23  
24  
25  
26  
27  
28  
29  
30  
31  
32  
33  
34  
35  
36  
37  
38  
39  
40  
41  
42  
43  
44  
45  
46  
47  
48  
49  
50  
51  
52  
53  
54  
55  
56  
57  
58  
59  
60

For peer review only

## References

- 
- <sup>1</sup> Borrás JM, Albrecht T, Audisio R, *et al.* Policy statement on multidisciplinary cancer care: European Partnership for Action Against Cancer Consensus Group. *Eur J Cancer* 2014;50:475–80.
- <sup>2</sup> Saini KS, Taylor C, Ramirez AJ, *et al.* Role of the multidisciplinary team in breast cancer management: results from a large international survey involving 39 countries. *Annals of Oncology* 2012;23:853–9.
- <sup>3</sup> Prades J, Remue E, van Hoof E, *et al.* Is it worth reorganising cancer services on the basis of multidisciplinary teams (MDTs)? A systematic review of the objectives and organisation of MDTs and their impact on patient outcomes. *Health Policy* 2015;119:464–74.
- <sup>4</sup> Berghmans T, Lievens Y, Aapro M, *et al.* European Cancer Organisation Essential Requirements for Quality Cancer Care (ERQCC): Lung cancer. *Lung Cancer* 2020;150:221–39.
- <sup>5</sup> Andritsch E, Beishon M, Bielack S, *et al.* ECCO Essential Requirements for Quality Cancer Care: Soft Tissue Sarcoma in Adults and Bone Sarcoma. A critical review. *Crit Rev Oncol Hematol* 2017;110:94–105.
- <sup>6</sup> Wilson AR, Marotti L, Bianchi S, *et al.* EUSOMA (European Society of Breast Cancer Specialists). The requirements of a specialist Breast Centre. *Eur J Cancer* 2013;49(17):3579–87.
- <sup>7</sup> Organisation of European Cancer Institutes (OECI) Standards (Accreditation and Designation Programme), 2019. [https://www.oeci.eu/accreditation/Page.aspx?name=OECI\\_STANDARDS](https://www.oeci.eu/accreditation/Page.aspx?name=OECI_STANDARDS)
- <sup>8</sup> Janssen A, Brunner M, Keep M, *et al.* Interdisciplinary eHealth Practice in Cancer Care: A Review of the Literature. *Int J Environ Res Public Health* 2017;14(11):1289.
- <sup>9</sup> Kutikov A, Weinberg DS, Edelman MJ, *et al.* A War on Two Fronts: Cancer Care in the Time of COVID-19. *Ann Intern Med* 2020;172(11):756–758.
- <sup>10</sup> Tepper DL, Burger AP, Weissman MA. Hands Down, COVID-19 Will Change Medical Practice. *Am J Manag Care* 2020;26(9):e274–e275.
- <sup>11</sup> Kitzinger J. Qualitative research. Introducing focus groups. *BMJ* 1995;311(7000):299–302.
- <sup>12</sup> Carlsen B, Glenton C. What about N? A methodological study of sample-size reporting in focus group studies. *BMC Med Res Methodol* 2011;11:26.
- <sup>13</sup> Sofaer S. Qualitative research methods. *Int J Qual Health Care* 2002;14:329e36.
- <sup>14</sup> Miles M, Huberman A. *Qualitative data analysis*. Newbury Park, CA: Sage Publications, 1994.
- <sup>15</sup> Muhr T. *ATLAS.ti 9 for Windows*. Berlin: Scientific Software Development, 2011.
- <sup>16</sup> Tong A, Sainsbury P, Craig J. Consolidated criteria for reporting qualitative research (COREQ): a 32-item checklist for interviews and focus groups. *Int J Qual Health Care* 2007;19:349–57.
- <sup>17</sup> World Health Organisation (WHO). From innovation to implementation. eHealth in the European Region. WHO Regional Office for Europe. Copenhagen Denmark. WHO Regional Office for Europe, 2016. <http://www.euro.who.int/en/ehealth>.
- <sup>18</sup> Keen J. Digital health care: Cementing centralisation? *Health Informatics Journal* 2014;20(3):168–75.
- <sup>19</sup> Janssen A, Robinson T, Brunner M, *et al.* Multidisciplinary teams and ICT: a qualitative study exploring the use of technology and its impact on multidisciplinary team meetings. *BMC Health Serv Res* 2018;18(1):444.
- <sup>20</sup> Neri E, Gabelloni M, Bäuerle T, *et al.* Involvement of radiologists in oncologic multidisciplinary team meetings: an international survey by the European Society of Oncologic Imaging. *Eur Radiol* 2021;31(2):983–91.

- 1  
2  
3
- 
- 4 <sup>21</sup> Soukup T, Lamb BW, Arora S, *et al.* Successful strategies in implementing a multidisciplinary team working in  
5 the care of patients with cancer: an overview and synthesis of the available literature. *J Multidiscip Healthc*  
6 2018;11:49-61.
- 7  
8 <sup>22</sup> Walraven JEW, Desar IME, Hoeven van der JJM, *et al.* Analysis of 105.000 patients with cancer: have they  
9 been discussed in oncologic multidisciplinary team meetings? A nationwide population-based study in the  
10 Netherlands. *Eur J Cancer* 2019;121:85–93.
- 11  
12 <sup>23</sup> Lau AYS, Staccini P. Artificial Intelligence in Health: New Opportunities, Challenges, and Practical  
13 Implications. *Yearb Med Inform* 2019;28(1):174–78.
- 14  
15 <sup>24</sup> Sidpra J, Chhabda S, Gaier C, *et al.* Virtual multidisciplinary team meetings in the age of COVID-19: an  
16 effective and pragmatic alternative. *Quant Imaging Med Surg* 2020;10(6):1204–07.
- 17  
18 <sup>25</sup> To N, Bekker HL, Henry K, *et al.* COVID-19 restrictions on multidisciplinary team meeting decision-making:  
19 service evaluation in a major UK cancer centre. *Br J Surg* 2021;108(4):e162–3.
- 20  
21 <sup>26</sup> European Commission, European Reference Networks (ERNs), 2018. [https://ec.europa.eu/health/ern\\_en](https://ec.europa.eu/health/ern_en).
- 22  
23 <sup>27</sup> Joint Action on Rare Cancer (JARC). Rare Cancer Agenda 2030 - Ten Recommendations from the EU Joint  
24 Action on Rare Cancers, 2018.  
25 [https://www.jointactionrarecancers.eu/attachments/article/265/Rare\\_Cancer\\_Agenda\\_2030.pdf](https://www.jointactionrarecancers.eu/attachments/article/265/Rare_Cancer_Agenda_2030.pdf).
- 26  
27 <sup>28</sup> Sudman S, Bradburn NM, Schwartz N. *Thinking about answers: the application of cognitive processes to*  
28 *survey methodology*. San Francisco: Jossey-Bass, 1996.
- 29  
30  
31  
32  
33  
34  
35  
36  
37  
38  
39  
40  
41  
42  
43  
44  
45  
46  
47  
48  
49  
50  
51  
52  
53  
54  
55  
56  
57  
58  
59  
60



236x146mm (96 x 96 DPI)

1  
2  
3  
4  
5  
6  
7  
8  
9  
10  
11  
12  
13  
14  
15  
16  
17  
18  
19  
20  
21  
22  
23  
24  
25  
26  
27  
28  
29  
30  
31  
32  
33  
34  
35  
36  
37  
38  
39  
40  
41  
42  
43  
44  
45  
46  
47  
48  
49  
50  
51  
52  
53  
54  
55  
56  
57  
58  
59  
60



126x165mm (96 x 96 DPI)

Supplementary Table 1: COREQ checklist.

| Domain 1: Research team and reflexivity |                                                                                                                                                                                                                                                                                                                                                                                                                                                                                                                                                                                                                                                                                                                                                                                                                                                                                                                                                                                                                                                                                                                                                    | Location in manuscript (Section, page no.) |
|-----------------------------------------|----------------------------------------------------------------------------------------------------------------------------------------------------------------------------------------------------------------------------------------------------------------------------------------------------------------------------------------------------------------------------------------------------------------------------------------------------------------------------------------------------------------------------------------------------------------------------------------------------------------------------------------------------------------------------------------------------------------------------------------------------------------------------------------------------------------------------------------------------------------------------------------------------------------------------------------------------------------------------------------------------------------------------------------------------------------------------------------------------------------------------------------------------|--------------------------------------------|
| <b>Personal Characteristics</b>         |                                                                                                                                                                                                                                                                                                                                                                                                                                                                                                                                                                                                                                                                                                                                                                                                                                                                                                                                                                                                                                                                                                                                                    |                                            |
| 1. Interviewer/facilitator              | <i>Which author/s conducted the interview or focus group?</i><br>JP, CC, JMB                                                                                                                                                                                                                                                                                                                                                                                                                                                                                                                                                                                                                                                                                                                                                                                                                                                                                                                                                                                                                                                                       | Methods, p. 6.                             |
| 2. Credentials                          | <i>What were the researcher's credentials?</i><br>JP – MPh, PhD; CC – PhD Candidate; LL – MD; KG – MD; EJ – MD; CL – MD; JM – RN; JP – MD; DR – MD; RS – MD, PhD; VV – MD; JMB – MD, PhD                                                                                                                                                                                                                                                                                                                                                                                                                                                                                                                                                                                                                                                                                                                                                                                                                                                                                                                                                           | -                                          |
| 3. Occupation                           | <i>What was their occupation at the time of the study?</i><br>JP – Senior researcher in cancer healthcare & policy analysis and Associated Professor (Faculty of Medicine, University of Barcelona)<br>CC – Junior researcher in health economics<br>JMB – Director of the Cancer Strategy in Catalonia and Spain and Professor of the Faculty of Medicine (University of Barcelona)<br>CL – Director of the Organisation of European Cancer Institutes (OECI)<br>LL, KG, EJ, JP, DR, RS, VV – Medical doctors in the different specialties they represent (RS, DR and VV are also Head of Service)<br>JM – Nurse specialist in cancer and President of the European Oncology Nursing Society (EONS)                                                                                                                                                                                                                                                                                                                                                                                                                                               | Extended information in table 1, p. 6      |
| 4. Gender                               | <i>Was the researcher male or female?</i><br>Male (n=9) and female (n=3) researchers                                                                                                                                                                                                                                                                                                                                                                                                                                                                                                                                                                                                                                                                                                                                                                                                                                                                                                                                                                                                                                                               | Table 1, p. 6                              |
| 5. Experience and training              | <i>What experience or training did the researcher have?</i><br>The leading researcher (JP) has extensive experience in the analysis of multidisciplinary teams, either from the perspective of their design and implementation, their impact on patient outcomes or their relevance as a principal node in cancer networks (e.g., Prades et al, HP, 2014; Prades et al, HSMR, 2017; Prades et al, BMC Public Health, 2011). JP and JMB has published a number of studies using qualitative research, including interviews, focus groups (e.g., those mentioned above and Prades et al, Breast, 2014; Prades et al, Radiother Oncol, 2017; Prades et al, EJPH, 2016) in biomedical journals, and promoted consensus among experts in different EU initiatives (Prades et al, ESMO Open, 2020). Two of these initiatives were devoted specifically to the development of cancer MDT both in Europe (Borras et al, EJC, 2014) and Spain (Guilabert and Prades, JMIR, 2021), the latter being an on-line self-assessment tool for cancer MDTs.<br>CC is a junior health economist that, aside from her experience in healthcare organisation analysis, | -                                          |



|                                             |                                                                                                                                                                                                                                                                                                                                                                                                                                                                                                                                                                                                                                                                                                                                                                                                                                                                                                                                                                                                                                                                                                                                                                                                                                                                                                  |                   |
|---------------------------------------------|--------------------------------------------------------------------------------------------------------------------------------------------------------------------------------------------------------------------------------------------------------------------------------------------------------------------------------------------------------------------------------------------------------------------------------------------------------------------------------------------------------------------------------------------------------------------------------------------------------------------------------------------------------------------------------------------------------------------------------------------------------------------------------------------------------------------------------------------------------------------------------------------------------------------------------------------------------------------------------------------------------------------------------------------------------------------------------------------------------------------------------------------------------------------------------------------------------------------------------------------------------------------------------------------------|-------------------|
|                                             | participated in one of these EU initiatives (Prades et al, ESMO Open, 2020).                                                                                                                                                                                                                                                                                                                                                                                                                                                                                                                                                                                                                                                                                                                                                                                                                                                                                                                                                                                                                                                                                                                                                                                                                     |                   |
| <b>Relationship with participants</b>       |                                                                                                                                                                                                                                                                                                                                                                                                                                                                                                                                                                                                                                                                                                                                                                                                                                                                                                                                                                                                                                                                                                                                                                                                                                                                                                  |                   |
| 6. Relationship established                 | <p><i>Was a relationship established prior to study commencement?</i></p> <p>There was no relationship between the informants and the researchers managing the study (JP, CC and JMB). Relevantly for this study, key informants (healthcare professionals) did not know each other before the study.</p>                                                                                                                                                                                                                                                                                                                                                                                                                                                                                                                                                                                                                                                                                                                                                                                                                                                                                                                                                                                        | -                 |
| 7. Participant knowledge of the interviewer | <p><i>What did the participants know about the researcher? e.g. personal goals, reasons for doing the research.</i></p> <p>Participants in the workshop/focus group were briefed on the purpose of the study through their respective scientific societies. Their participation was an integral part of articulating the experience introducing ICT in their health system in the form of a case study (first part of the workshop). The letter of invitation used to that end was prepared by the researchers and used by the gatekeeper (ECCO). Such information showed the general goal and the requirements to participate, which for instance highlighted the proper professional profiles given the medical (not purely IT) nature of the study. Due to the relevance of the participants' contribution and their close involvement in generating knowledge during the study (i.e., the presentation of cases that underpin the discussion of ICT adoption processes, the critical review, and the validation of results), they were invited to co-author the paper. to the relevant contribution of the participants and their deep involvement (i.e., full-day workshop plus discussion, critical revision, and validation of results), they were invited to co-authorise the paper.</p> | Methods, p. 5     |
| 8. Interviewer characteristics              | <p><i>What characteristics were reported about the interviewer/facilitator? e.g. Bias, assumptions, reasons and interests in the research topic</i></p> <p>The researchers leading the study (JP, CC and JMB) had no direct experience with the topics included in the paper, except for multidisciplinary cancer care. In order to avoid social desirability bias, where participants might misrepresent their improvement efforts to provide desirable answers, we asked informants to describe both positive and negative experiences when presenting their cases.</p>                                                                                                                                                                                                                                                                                                                                                                                                                                                                                                                                                                                                                                                                                                                        | Discussion, p. 16 |
| <b>Domain 2: study design</b>               |                                                                                                                                                                                                                                                                                                                                                                                                                                                                                                                                                                                                                                                                                                                                                                                                                                                                                                                                                                                                                                                                                                                                                                                                                                                                                                  |                   |
| <b>Theoretical framework</b>                |                                                                                                                                                                                                                                                                                                                                                                                                                                                                                                                                                                                                                                                                                                                                                                                                                                                                                                                                                                                                                                                                                                                                                                                                                                                                                                  |                   |
| 9. Methodological orientation and Theory    | <p><i>What methodological orientation was stated to underpin the study? e.g. grounded theory, discourse, analysis, ethnography, phenomenology, content analysis</i></p> <p>We used open coding and applied thematic analysis.</p>                                                                                                                                                                                                                                                                                                                                                                                                                                                                                                                                                                                                                                                                                                                                                                                                                                                                                                                                                                                                                                                                | Methods, p. 6     |

| <b>Participant selection</b>     |                                                                                                                                                                                                                                                                                                                                                                                                |                       |
|----------------------------------|------------------------------------------------------------------------------------------------------------------------------------------------------------------------------------------------------------------------------------------------------------------------------------------------------------------------------------------------------------------------------------------------|-----------------------|
| 10. Sampling                     | <i>How were participants selected? e.g. purposive, convenience, consecutive, Snowball</i><br>Purposive sample including key informants from the most relevant disciplines related to cancer care. Informants were recruited via European scientific societies and ECCO (mentioned above, see 7). Three of them were not able to get involved in focus group and were interviewed individually. | Methods, p. 5         |
| 11. Method of approach           | <i>How were participants approached? e.g. face-to-face, telephone, mail, email</i><br>Informants were designated by the scientific societies to whom they belong. The specific method of approach used by them was blinded to both the gatekeeper and the researchers managing the study.                                                                                                      | Methods, p. 5         |
| 12. Sample size                  | <i>How many participants were in the study?</i><br>Nine                                                                                                                                                                                                                                                                                                                                        | Methods, p. 5         |
| 13. Non-participation            | <i>How many people refused to participate or dropped out? Reasons?</i><br>One scientific society did not find the adequate professional profile to be involved in the study.                                                                                                                                                                                                                   | Discussion, p. 16     |
| <b>Setting</b>                   |                                                                                                                                                                                                                                                                                                                                                                                                |                       |
| 14. Setting of data collection   | <i>Where was the data collected? e.g. home, clinic, workplace</i><br>Data was collected in a neutral setting, the European Cancer Organisation (ECCO) headquarters in Brussels.                                                                                                                                                                                                                | Methods, p. 5         |
| 15. Presence of non-participants | <i>Was anyone else present besides the participants and researchers?</i><br>No.                                                                                                                                                                                                                                                                                                                | -                     |
| 16. Description of sample        | <i>What are the important characteristics of the sample? e.g. demographic data, date</i><br>A multidisciplinary European workshop, lasting approximately 5 hours, was organised on 5 July 2019. Participants belonged to different European scientific societies, specialties, countries (Italy, Spain, Belgium, and Croatia) and regional healthcare systems (table 1).                       | Methods, p. 5         |
| <b>Data collection</b>           |                                                                                                                                                                                                                                                                                                                                                                                                |                       |
| 17. Interview guide              | <i>Were questions, prompts, guides provided by the authors? Was it pilot tested?</i><br>The focus group script (table 2) was never delivered to the informants but the main topics to be dealt with were announced at the beginning of the workshop. The same script was used to conduct the semi-structured interviews.                                                                       | -                     |
| 18. Repeat interviews            | <i>Were repeat interviews carried out? If yes, how many?</i><br>No.                                                                                                                                                                                                                                                                                                                            | -                     |
| 19. Audio/visual recording       | <i>Did the research use audio or visual recording to collect the data?</i><br>The focus group and semi-structured interviews were audio recorded using a digital recorder.                                                                                                                                                                                                                     | Methods, p.5 and p. 6 |
| 20. Field notes                  | <i>Were field notes made during and/or after the</i>                                                                                                                                                                                                                                                                                                                                           | Methods, p. 6         |

|                                        |                                                                                                                                                                                                                                                                                                                                                                                         |                    |
|----------------------------------------|-----------------------------------------------------------------------------------------------------------------------------------------------------------------------------------------------------------------------------------------------------------------------------------------------------------------------------------------------------------------------------------------|--------------------|
|                                        | <i>interview or focus group?</i><br>The researchers (CC, JP) took field notes during the case study presentations (not the focus group).                                                                                                                                                                                                                                                |                    |
| 21. Duration                           | <i>What was the duration of the interviews or focus group?</i><br>The focus group lasted 2 hours and the interviews ranged from 46 to 52 minutes.                                                                                                                                                                                                                                       | -                  |
| 22. Data saturation                    | <i>Was data saturation discussed?</i><br>Yes, it is explained why data saturation was neither achieved nor a desired result.                                                                                                                                                                                                                                                            | Discussion, p. 16. |
| 23. Transcripts returned               | Were transcripts returned to participants for comment and/or correction?<br>No.                                                                                                                                                                                                                                                                                                         | -                  |
| <b>Domain 3: analysis and findings</b> |                                                                                                                                                                                                                                                                                                                                                                                         |                    |
| <b>Data analysis</b>                   |                                                                                                                                                                                                                                                                                                                                                                                         |                    |
| 24. Number of data coders              | <i>How many data coders coded the data?</i><br>One.                                                                                                                                                                                                                                                                                                                                     | Methods, p. 6      |
| 25. Description of the coding tree     | <i>Did authors provide a description of the coding tree?</i><br>No.                                                                                                                                                                                                                                                                                                                     | -                  |
| 26. Derivation of themes               | <i>Were themes identified in advance or derived from the data?</i><br>Our focus was the ICTs and ICT-driven care components, and these findings were derived directly from the data.                                                                                                                                                                                                    | Methods            |
| 27. Software                           | <i>What software, if applicable, was used to manage the data?</i><br>Atlas-ti 6.2 and Microsoft Word                                                                                                                                                                                                                                                                                    | Methods, p. 6      |
| 28. Participant checking               | <i>Did participants provide feedback on the findings?</i><br>JP, CC, JMB circulated the initial draft among participants. They made suggestions and proposed changes with regards to the <i>Discussion</i> , and endorsed the <i>Results</i> .                                                                                                                                          | Methods, p. 6      |
| <b>Reporting</b>                       |                                                                                                                                                                                                                                                                                                                                                                                         |                    |
| 29. Quotations presented               | <i>Were participant quotations presented to illustrate the themes / findings? Was each quotation identified? e.g. participant number</i><br>We presented quotations (table 3) organised around main topics. Since the number of participants was limited, we did not identify each one.                                                                                                 | Methods, p. 13     |
| 30. Data and findings consistent       | <i>Was there consistency between the data presented and the findings?</i><br>Yes.                                                                                                                                                                                                                                                                                                       | Methods            |
| 31. Clarity of major themes            | Were major themes clearly presented in the findings?<br>Yes.                                                                                                                                                                                                                                                                                                                            | Results            |
| 32. Clarity of minor themes            | <i>Is there a description of diverse cases or discussion of minor themes?</i><br>Yes. We presented all ICTs and ICT-driven care components found in MTMs' work. Some of them were said to be mostly adopted while other scarcely adopted. However, we did not intend to evaluate the degree of their adoption but which ones were used in clinical practice and the related challenges. | Results            |

# BMJ Open

## Use of information and communication technologies (ICTs) in cancer multidisciplinary team meetings: An explorative study based on EU healthcare professionals

|                                 |                                                                                                                                                                                                                                                                                                                                                                                                                                                                                                                                                                                                                                           |
|---------------------------------|-------------------------------------------------------------------------------------------------------------------------------------------------------------------------------------------------------------------------------------------------------------------------------------------------------------------------------------------------------------------------------------------------------------------------------------------------------------------------------------------------------------------------------------------------------------------------------------------------------------------------------------------|
| Journal:                        | <i>BMJ Open</i>                                                                                                                                                                                                                                                                                                                                                                                                                                                                                                                                                                                                                           |
| Manuscript ID                   | bmjopen-2021-051181.R3                                                                                                                                                                                                                                                                                                                                                                                                                                                                                                                                                                                                                    |
| Article Type:                   | Original research                                                                                                                                                                                                                                                                                                                                                                                                                                                                                                                                                                                                                         |
| Date Submitted by the Author:   | 24-Aug-2022                                                                                                                                                                                                                                                                                                                                                                                                                                                                                                                                                                                                                               |
| Complete List of Authors:       | Prades, Joan; Catalan Institute of Oncology, Catalan Cancer Strategy Coll-Ortega, Cristina; Catalan Institute of Oncology Dal Lago, Lissandra; Jules Bordet Institute Goffin, Karolien; KU Leuven Javor, Eugen; Bjelovar General Hospital Lombardo, Claudio; Organisation of European Cancer Institutes (OECI) de Munter, Johan; University Hospital Ghent Ponce, Jordi; Bellvitge University Hospital Regge, Daniele; Candiolo Cancer Institute Salazar, Ramón; Catalan Institute of Oncology Valentini, Vincenzo; Fondazione Policlinico Universitario Agostino Gemelli IRCCS Borras, Josep; University of Barcelona, Clinical Sciences |
| <b>Primary Subject Heading</b>: | Health services research                                                                                                                                                                                                                                                                                                                                                                                                                                                                                                                                                                                                                  |
| Secondary Subject Heading:      | Oncology, Qualitative research, Health policy                                                                                                                                                                                                                                                                                                                                                                                                                                                                                                                                                                                             |
| Keywords:                       | ONCOLOGY, HEALTH SERVICES ADMINISTRATION & MANAGEMENT, Information technology < BIOTECHNOLOGY & BIOINFORMATICS, Telemedicine < BIOTECHNOLOGY & BIOINFORMATICS                                                                                                                                                                                                                                                                                                                                                                                                                                                                             |
|                                 |                                                                                                                                                                                                                                                                                                                                                                                                                                                                                                                                                                                                                                           |

SCHOLARONE™  
Manuscripts



I, the Submitting Author has the right to grant and does grant on behalf of all authors of the Work (as defined in the below author licence), an exclusive licence and/or a non-exclusive licence for contributions from authors who are: i) UK Crown employees; ii) where BMJ has agreed a CC-BY licence shall apply, and/or iii) in accordance with the terms applicable for US Federal Government officers or employees acting as part of their official duties; on a worldwide, perpetual, irrevocable, royalty-free basis to BMJ Publishing Group Ltd ("BMJ") its licensees and where the relevant Journal is co-owned by BMJ to the co-owners of the Journal, to publish the Work in this journal and any other BMJ products and to exploit all rights, as set out in our [licence](#).

The Submitting Author accepts and understands that any supply made under these terms is made by BMJ to the Submitting Author unless you are acting as an employee on behalf of your employer or a postgraduate student of an affiliated institution which is paying any applicable article publishing charge ("APC") for Open Access articles. Where the Submitting Author wishes to make the Work available on an Open Access basis (and intends to pay the relevant APC), the terms of reuse of such Open Access shall be governed by a Creative Commons licence – details of these licences and which [Creative Commons](#) licence will apply to this Work are set out in our licence referred to above.

Other than as permitted in any relevant BMJ Author's Self Archiving Policies, I confirm this Work has not been accepted for publication elsewhere, is not being considered for publication elsewhere and does not duplicate material already published. I confirm all authors consent to publication of this Work and authorise the granting of this licence.

1  
2  
3 Use of information and communication technologies (ICTs) in cancer multidisciplinary team  
4 meetings: An explorative study based on EU healthcare professionals  
5

6 Joan Prades<sup>1,11</sup> Cristina Coll-Ortega<sup>1</sup>, Lissandra Dal Lago<sup>2</sup>, Karolien Goffin<sup>3</sup>, Eugen Javor<sup>4</sup>, Claudio  
7 Lombardo<sup>5</sup>, Johan de Munter<sup>6</sup>, Jordi Ponce<sup>7</sup>, Daniele Regge<sup>8</sup>, Ramón Salazar<sup>9</sup>, Vincenzo Valentini<sup>10</sup>,  
8 Josep M. Borrás<sup>1,11</sup>  
9

10  
11  
12 <sup>1</sup> Catalanian Cancer Strategy, Department of Health, Barcelona, Spain  
13

14 <sup>2</sup> Department of Medicine, Institut Jules Bordet, Université Libre de Bruxelles, 1 Rue Héger Bordet, 1000,  
15 Brussels, Belgium, and International Society of Geriatric Oncology (SIOG).  
16

17 <sup>3</sup> Department of Nuclear Medicine, University Hospital Leuven, Division of Nuclear Medicine and Molecular  
18 Imaging, KU Leuven, Leuven, Belgium, and European Association of Nuclear Medicine.  
19

20 <sup>4</sup> Pharmacy Department, General Hospital Bjelovar, Bjelovar, Croatia, and European Society of Oncology  
21 Pharmacy (ESOP).  
22

23 <sup>5</sup> Organisation of European Cancer Institutes (OEI), Rue d'Egmont,11, 1000 Brussels, Belgium, and SOS  
24 Europe, Via B. Bosco 57/9A, 16121, Genova, Italia.  
25

26 <sup>6</sup> Cancer Center, University Hospital Ghent, Ghent, Belgium, and European Oncology Nursing Society, Brussels,  
27 Belgium.  
28

29 <sup>7</sup> University Hospital of Bellvitge, Department of Gynaecology, Barcelona, Spain, University of Barcelona  
30 (IDIBELL) and ExCouncil Member of European Society of Gynaecological Oncology (ESGO)  
31

32 <sup>8</sup> Department of Radiology, Candiolo Cancer Institute, FPO-IRCCS, Candiolo, Italy, Department of Surgical  
33 Sciences, University of Turin, Turin, Italy and Associate Professor in Radiology, University of Torino, Italy and  
34 Europe, and European Society of Radiology (ESR).  
35

36 <sup>9</sup> Institut Català d'Oncologia, Oncobell Program, IDIBELL, CIBERONC, University of Barcelona, L'Hospitalet de  
37 Llobregat, Barcelona, Spain and European Society of Medical Oncology (ESMO).  
38

39 <sup>10</sup> Radiation Oncology and Hematology Department, Fondazione Policlinico Universitario A.Gemelli IRCCS,  
40 Università Cattolica S.Cuore– ROME (I) and European Society for Radiotherapy & Oncology (ESTRO).  
41

42 <sup>11</sup> Department of Clinical Sciences, University of Barcelona (IDIBELL).  
43  
44  
45  
46  
47

48 **Corresponding author:** Joan Prades. Tel.: +34 93 2607417; fax: +34 93 260 73 16. E-mail address:  
49 jprades@iconcologia.net  
50  
51  
52  
53  
54  
55  
56  
57  
58  
59  
60

## Abstract

**Objectives:** Multidisciplinary teams in cancer care are increasingly using information and communication technology (ICT), hospital health information system (HIS) functionalities, and ICT-driven care components. We aimed to explore the use of these tools in multidisciplinary team meetings (MTMs) and to identify the critical challenges posed by their adoption based on the perspective of professionals representatives from European scientific societies.

**Design:** This qualitative study used discussion of cases and focus group technique to generate data. Thematic analysis was applied.

**Setting:** Healthcare professionals working in a multidisciplinary cancer care environment.

**Participants:** Selection of informants was carried out by European scientific societies in accordance with professionals' degree of experience in adopting the implementation of ICT and from different health systems.

**Results:** Professionals representatives of 9 European scientific societies were involved. Up to 10 ICTs, HIS functionalities, and care components are embedded in the informational and decision-making processes along three stages of MTMs. ICTs play a key role in opening MTMs to other institutions (e.g., by means of molecular tumour boards) and information types (e.g. patient-reported outcome measures), and in contributing to the internal efficiency of teams. While ICTs and care components have their own challenges, the information technology context is characterised by the massive generation of unstructured data, the lack of interoperability between systems from different hospitals, and HIS that are conceived to store and classify information rather than to work with it.

**Conclusions:** The emergence of an MTM model that is better integrated in the wider health system context and incorporates inputs from patients and support systems make traditional meetings more dynamic and interconnected. Although these changes signal a second transition in the development process of multidisciplinary teams, they occur in a context marked by clear gaps between the information and management needs of MTMs and the adequacy of current HIS.

### Strengths and limitations of this study

- The paper proposes an exploration of the mostly adopted information and communication technologies (ICTs), hospital health information system (HIS) functionalities, and ICT-driven care components in multidisciplinary team meetings (MTMs).
- A qualitative study was conducted based on key informants from different European scientific societies and health systems.
- Key informants were experienced in adopting the implementation of ICT in MTMs, and this was useful for both case presentation (including unsuccessful practices) and focus group discussion.
- Owing to the explorative nature of the study, it was not possible to capture all ICTs and care components being used in MTMs and this way achieve data saturation.

**Keywords:** Neoplasms, Information Technology, Patient Care Team, Interdisciplinary Communication.



## Introduction

Since the 1990s, multidisciplinary teams (MDTs) for cancer care have improved their internal organisation, increasing the representativeness of the team by including more roles and broadening care objectives and scope of practice to new areas of care (e.g. survivorship care).<sup>1</sup> Although there are pronounced organisational and financial differences between MDTs from different European health systems,<sup>2</sup> all MDTs are characterised by the central role of the multidisciplinary team meeting (MTM) – also referred as tumour board or multidisciplinary cancer conference – as the main decision-making body.<sup>3</sup> These meetings represent a widely recognised standard of care, including in different accreditation and quality systems.<sup>4,5,6,7</sup>

The use of information and communication technologies (ICTs) have taken off in the 21st century, facilitating new modes of MDT interaction and streamlining information management processes.<sup>8</sup> In fact, the potential to transform multidisciplinary cancer care extends beyond typical ICT functionalities like virtual MTMs and telehealth, encompassing the integration of other care components like patient-reported outcome measures (PROMs) and clinical decision support systems (CDSS) into hospitals' ICT and health information systems (HIS). The adoption of ehealth practice is generally modest and uneven between different European health systems, and unsuccessful experiences are not unheard of; however, the qualitative leap in the use of ICTs – clearly accelerated by the COVID-19 pandemic<sup>9,10</sup> – and associated care components raises the question of whether MDTs are undergoing a second transition.

The European Commission's Innovative Partnership for Action Against Cancer (iPAAC) Joint Action, defined as a priority the issue of how ICTs affect the daily work of cancer MDTs, an ambitious endeavour that was tackled in collaboration with the European scientific societies. In this study, we explored the set of ICTs, HIS-based functionalities, and associated care components used by MTMs in order to identify the critical challenges posed by their adoption based on the perspective of professionals representatives from European scientific societies.

## Methods

### *Study design and setting*

Health professionals' perspectives on the use of ICTs, HIS, and associated care components in cancer MTMs were analysed by qualitative methodology. A multidisciplinary European workshop, lasting approximately 5 hours, was organised on 5 July 2019 in a neutral setting (European CanCer Organisation (ECCO) headquarters in Brussels). The workshop was divided in two phases. In the first, each professional presented a prepared case study based on their local experience and healthcare system. The contrasts sparked discussions about the adoption and practices of ICT-led informational and clinical decision-making processes embedded in MTMs. Secondly, focus groups were used to explore the opinions and normative systems through group interactions<sup>11</sup> from the perspective of each medical discipline, which brought to light conceptual-based reflections and knowledge about the relevance of the different ICTs, HIS functionalities, and ICT-driven care components.

### *Selection of informants and sampling strategy*

The workshop was co-organised between the Catalan Institute of Oncology (ICO) and ECCO within the framework of the iPAAC Joint Action. ECCO played a gatekeeper role in the selection of key informants, sending a letter of invitation prepared by the researchers to different European scientific societies and explaining the reasons for the study. For selection of informants and composition of the purposive sample, informants were designated by the scientific societies according to four inclusion criteria: (1) representing the diagnosis and treatment perspectives and including other relevant issues in cancer care (e.g., oncogeriatrics); (2) experienced in leading and/or adopting the implementation of ICT; (3) working in a multidisciplinary cancer care environment; and (4) from different healthcare areas and European health systems. The exclusion criterion, emphasised by ECCO when contacting the different societies, consisted of avoiding the participation of experts in medical technologies or ICTs exclusively from a technical point of view. Clinical reasoning on ICTs rather than focusing on technologies themselves was the critical aspect of the selection. Guidance on group size is common and seldom goes beyond a minimum of 4 and a maximum of 12,<sup>12</sup> but we restricted this number to 10 in order to make it manageable. 9 professionals from different European scientific societies and from 4 health systems, including the Organisation of European Cancer Institutes, were finally enrolled (table 1). They were included as co-authors of this study.

### *Analysis*

Two researchers conducted the meeting, with one acting as moderator (JP) and the other as observer (CC). A sheet containing information about the study goals and a consent form were

handed out before starting. The researchers (CC, JP) took field notes during the case study presentations. Spontaneous interaction was encouraged during the focus group session, which was recorded and transcribed verbatim. Researchers checked for consistency between the recording and text and conducted the subsequent analysis. Four issues (corresponding to MTM stages) were used to organise the discussion: patient data collection and accessibility, case presentation, results and implications of MTMs discussions, and virtual MTMs (table 2).

To analyse the data, we applied thematic analysis criteria, which emphasise the meaning of the text and interpret its thematic content.<sup>13,14</sup> We read through the transcript to identify general themes and specific categories within the themes, ensuring interpreter consensus. Only one researcher coded the data (JP). The research process was inductive, with a constant effort to capture ICTs and other care components related to MTMs, along with their implications and challenges. Figure 1 presents the themes in the form of a coding tree chart. Atlas-ti 6.2 software<sup>15</sup> was used to systematically code and analyse data: all textual data were indexed and co-occurring codes identified. However, the software was used in a limited way to rearrange the data, construct charts, and find associations between themes. Preliminary results were discussed amongst the research team (JP,CC,JMB). The initial draft was then widely circulated among workshop participants for final approval. This study was carried out in agreement with the procedures in consolidated criteria for reporting qualitative research (COREQ).<sup>16</sup>

#### *Patient and Public Involvement*

No patient involved.

**Table 1.** Affiliations of the nine professionals that took part in the workshop

| Organisation                                         | Country      | Profession                                    | Sex    | Years of experience |
|------------------------------------------------------|--------------|-----------------------------------------------|--------|---------------------|
| European Society of Radiology (ESR)                  | Italy        | Radiologist                                   | Male   | 33                  |
| European Association of Nuclear Medicine (EANM)      | Belgium      | Nuclear medicine physician                    | Female | 9                   |
| European Oncology Nursing Society (EONS)             | Belgium      | Oncology nursing                              | Male   | 21                  |
| European Society of Oncology Pharmacy (ESOP)         | Croatia      | Clinical pharmacy specialist                  | Male   | 6                   |
| International Society of Geriatric Oncology (SIOG)   | Belgium      | Medical oncologist                            | Female | 15                  |
| Organisation of European Cancer Institutes (OECI)    | Pan-European | Manager of international health organisations | Male   | 45                  |
| European Society for Radiotherapy & Oncology (ESTRO) | Italy        | Radiation oncologist                          | Male   | n/a                 |
| European Society of Medical Oncology (ESMO)          | Spain        | Medical oncologist                            | Male   | 22                  |
| European Society of Gynaecological Oncology (ESGO)   | Spain        | Gynaecologist and obstetrician                | Male   | 30                  |

**Table 2.** Cancer multidisciplinary team meetings (MTMs) and ICTs: focus group script**1. Data collection and accessibility**

How are the patients' lists drawn up?

How is patient information collected (sources; use of Electronic Health Record, EHRs)?

Are non-tumour specific issues (such as psychooncology or oncogeriatrics) captured? How?

Is the case presentation structured (e.g., on the basis of a template)? Is it electronically linked to the hospital HIS or prepared on a separate file?

**2. Patient case presentation and decision-making**

How is the case presented? What information is it based on?

Are pre-treatment digitised images required in the MTMs? What quality criteria are used, if any, and what display problems have you encountered? What interoperability exists with other institutions and IT systems integration (i.e., degree of standardisation)?

What are the technological conditions (e.g., high-definition projector; double-screen; PCs in the room)?

Describe the use of PROMs/CDSS (i.e., layers of information like protocols; technology at the frontline).

**3. Results and implications of MTMs discussions**

Are the minutes of the MTM available and accessible?

Are decisions recorded on the EHR?

How are medical appointments organised?

How team results are assessed using HIS (e.g., toxicity, QoL issues; MTMs information as output)?

Are MTM decisions and clinical outcomes (real-world data) connected to/feeding AI systems?

**4. Virtual MTMs**

What is your experience with virtual MTMs? What challenges are associated with them?

Types: "expert" and "non-expert" teams; communication between expert teams; etc.

How virtual MTMs are organised and implemented (engagement of dispersed members, specialists, GPs)?

Interoperability, privacy and confidentiality of patient data issues

How reliable is the technology? What difficulties exist, if any, in using technology outside a single organisation (e.g., virtual consultation of tests)?

*Abbreviations:* CDSS: clinical decision support system; EHR: electronic health record; HIS: health information system; PC: personal computer; PROM: patient-reported outcome measure; QoL: quality of life.

## Results

The results were organised on the basis of four domains that correspond to the three stages of MTM development: (a) preparation and organisation, (b) clinical decision-making process, and (c) recording of decisions and outcome evaluation, while the first presented ( $\alpha$ ) is a transversal domain capturing the contextual perspective. Some quotations from the focus group session are used anonymously in the present paper (table 3).

### **( $\alpha$ ) Clinical data and information technology (IT) contextual factors**

Accessible information about cases under discussion in the MTM is essential for agile decision-making. Three elements of the IT context determine the degree of integration, data structuring, and standardised collection of medical information.

#### *Hospital health information system (HIS): the logic of independent repositories*

The informational processes related to MDTs' activity are largely shaped by the hospital HIS, which is not generally structured around patient care processes but rather around the inputs from different functions or sub-systems of each clinical service (e.g., Pathology). This means that data collection is performed through independent repositories from which different inputs are extracted in order to draw up a summary of a patient's case and discuss it in the MTM. Several informants noted the inherent contrast with MDTs, which are cross-sectional by nature and represent care processes in and of themselves (e.g., patients with colon cancer), not just a single specialty, service, or care episode. Even though electronic health records (EHRs) link different information sources and can be practical enough to use during the MTM, they do not arrange all of the elements relevant to a patient's diagnosis and treatment in a specific and integrated way.

#### *Free-text and pdf formats and the applicability of medical information*

Generally, medical information is not recorded through a single computer system from which it can be extracted or modified in a structured way. Much of the information is in a free-text format, predominantly physician-dependent and captured in a pdf, which is difficult to code, use, and access. In contrast, if the data records are electronically structured — as demonstrated for breast cancer during the workshop, ICTs/HIS can potentially change how all the available information is collected and visualised during the MTM presentation.

#### *Standardisation of interhospital informational processes*

Another factor — which may represent the most time-consuming part of MTM preparation — is obtaining information for patients referred from other hospitals. IT systems from different hospitals

1  
2  
3 are rarely integrated or standardised, so patients are often referred with low-quality images, images  
4 that do not meet specific requirements, and even with CD-ROMs, prompting the need for repeating  
5 tests. Professionals need to obtain the original information, not just the summary, and they cannot  
6 diagnose without downloading the original images in the system to review them properly. The lack  
7 of standardisation in the exchange of images causes important delays in decision-making, and in  
8 medical specialties applying ionising radiation, this repetition is problematic because it can be  
9 harmful to patients' health. Instead, when different hospitals agree to use a common HIS, and  
10 therefore the same EHRs for patients, referring patients does not imply any special obstacles.

### 17 **(a) Preparation and organisation of the MTM**

#### 18 *(1) Multidisciplinary electronic patient agenda and patients' stratification*

19  
20 Using a multidisciplinary electronic patient agenda to draw up patient lists helps MDTs to better  
21 anticipate and rapidly manage case discussions. Professionals wishing to discuss a case on the MTM  
22 reserve a time slot for a consultation using the hospital HIS in the same way they would do so for an  
23 appointment with any other hospital service. This way, all the professionals can see the list of  
24 patients to discuss in real time and then prepare for the meeting accordingly (i.e., patients with  
25 pending diagnostic tests results may be removed from the list). Nevertheless, informants stressed  
26 that such automation is limited in most MDTs, with no computer system used. Typically, the MTM  
27 coordinator collects and collates team members' proposals and then distributes them in the form of  
28 a medical chart containing the clinical description of each patient. Professionals also use the  
29 electronic agenda to stratify patients into high and low priority cases, distinguishing between cases  
30 that should be discussed in depth and those that only require confirmation that the treatment  
31 strategy is in line with the guideline. While stratification is informal nowadays, its digitisation would  
32 improve efficiency and organisation of the discussion process, cueing the professionals that only  
33 need to weigh in on a few cases (e.g. reconstructive surgeons, general practitioners, MDT members  
34 accessing remotely) on when they should attend.

#### 35 *(2) Checklist & software for patient case presentation*

36  
37 Some MDTs use templates or checklists to present patient cases, while for others the mode of  
38 presentation depends on individual professionals or is assumed by junior doctors. The qualitative  
39 leap on this point occurs when the hospital HIS (or external software that processes HIS data) is  
40 capable of capturing and integrating all the relevant data that MDTs need to make decisions.  
41 Professionals can then directly narrate what is shown onscreen, not what is summarised in the  
42 medical chart. Structured case presentations have the capacity to improve efficiency,  
43 comprehensiveness, and rigor during the MTM, for example by reserving a specific slot to  
44  
45  
46  
47  
48  
49  
50  
51  
52  
53  
54  
55  
56  
57  
58  
59  
60

1  
2  
3 discuss data on the patient's geriatric situation on the information agenda. However, informants  
4 expressed caution about basing the MTM discussion on rigid checklists and computerised categories,  
5 since it may limit the individualisation and open discussion of every patient.  
6  
7

### 8 *(3) Picture Archiving and Communication System (PACS) & imaging display*

9  
10 The PACS workstation is crucial for medical imaging digitalisation and can be used in combination  
11 with a simple software programme to allow MDTs to visualise the images directly on the projector or  
12 screen used in the meeting. This greatly facilitates the presentation of images and contributes to  
13 synchronising the MDT's work; however, not all MTMs have this connection, and the ability to  
14 interpret nuclear medicine images using PACS is limited.  
15  
16  
17  
18

## 19 **(b) Clinical decision-making process**

### 20 *(4) Patient-reported outcome measures (PROMs)*

21  
22 Informants believed that PROMs (e.g., a symptoms questionnaire completed by patients) help to  
23 improve decision-making in MTMs by offering real-time data for discussion, reducing delays and re-  
24 discussions. For example, a PROM alert system could warn the MDT that an endometrial cancer  
25 patient is oedematous, triggering cancellation of surgery. Some uncertainty existed about whether  
26 patients should fill in the PROMs questionnaires alone or with assistance (from a health professional  
27 or dedicated software) to help them interpret the questions.  
28  
29  
30  
31  
32  
33

### 34 *(5) Artificial intelligence & clinical decision support systems (CDSS)*

35  
36 Artificial intelligence, especially CDSS, which rely on pre-established clinical algorithms as well as  
37 real-world data, provokes conflicting reactions in the sphere of MTMs. While most informants  
38 expressed scepticism and misgivings, some have also implemented 'home-made' web-based  
39 platforms or were willing to experiment and discover their real potential (e.g., as a supportive tool  
40 indicating patients' risk of local recurrence). Informants identified three main challenges posed by  
41 CDSS. First, CDSS should have safeguards to ensure that decision-making is robust and reproducible.  
42 Lack of trustworthiness was foreseen if CDSS propose treatment strategies based on unknown  
43 criteria or criteria that may not have been clinically validated by a physician. Second, continuous  
44 updates are essential to take into account new scientific evidence and avert obsolete  
45 recommendations. Finally, CDSS must capture clinical complexity (i.e., including dimensions such as  
46 oncogeriatrics) and patient preferences. Currently, there is no shared vision about whether CDSS  
47 should be oriented toward 'simpler' or 'more complex' cases, nor whether a CDSS can include  
48 existing information on open clinical trials.  
49  
50  
51  
52  
53  
54  
55  
56  
57  
58

### 59 *(6) Provision of patients' genomics information & molecular tumour boards*



1  
2  
3 The emergence of personalised medicine can impact decision-making in MTMs. The idea of  
4 implementing molecular tumour boards (comprised of specialists in genetics, biology, medical  
5 oncology, bioinformatics, and pathology) has emerged due to the complexity of selecting patients  
6 and evaluating different options according to the information provided by next generation  
7 sequencing. But integrating this area into MTMs poses specific challenges beyond the technical  
8 challenges of improving clinical decisions. For one, MTMs must access genomic information, and  
9 hospitals do not always have this technology onsite, making virtual MTMs necessary. Moreover, the  
10 interpretation of genomic information must be consistent with overall therapeutic planning,  
11 including indications for drugs.  
12  
13  
14  
15  
16  
17

#### 18 19 *(7) Virtual MTMs*

20  
21 Virtual MTMs facilitate regular, multicentre meetings, but informants stressed that virtual MTMs do  
22 not justify delivering treatments in local centres that may not be able to guarantee adequate quality  
23 of care or patients' access to clinical trials. However, they can serve to reach a consensus and  
24 coordinate provision of chemotherapy or patient follow-up in the local centre. Furthermore,  
25 asynchronous MTMs – discussing cases without involving the other institution in real-time – were  
26 seen as problematic; efforts to save time should be focused on making synchronous MTMs more  
27 efficient rather than using an asynchronous model.  
28  
29  
30  
31  
32

33 An inherent problem of virtual MTMs is confidentiality when accessing clinical data in  
34 patients receiving treatment in other hospitals, particularly when local legislation follows the  
35 European General Data Protection Regulation. Some informants reported having to fill in a consent  
36 form in order to communicate and exchange patient information between centres, while others did  
37 not. A few pointed out that an interhospital HIS averts this obstacle. Another example of how to  
38 address this issue is to send a link that is configured to expire within hours to patients' EHRs upon  
39 referral.  
40  
41  
42  
43  
44

#### 45 **(c) Recording of decisions and outcome evaluation**

##### 46 47 *(8) MTM decisions and minutes*

48  
49 Decision-making in MTMs produces information and medical summons for the patient. On the  
50 information side, most team decisions are recorded in the patient's EHR and generally reflected in  
51 the treatment strategy and in other medical decisions. This makes the information accessible in the  
52 hospital context. However, decisions are normally recorded in the same free-text format used for  
53 other data, limiting their subsequent use as information inputs that can be assessed in terms of  
54 clinical outcomes or team performance in the medium to long term. The MTM minutes or reports  
55 synthesise the team's collective reasoning and any potential divergences among its members. They  
56  
57  
58  
59  
60



also follow a free-text format, which was seen as difficult to change considering the need to qualify decisions and acknowledge discrepancies.

#### *(9) Management of patient appointments*

Regardless of the administrative support that MTMs have, patient summons can be facilitated by HIS that allow agile, real-time management. Ideally, appointment summons generated during the MTM should be automatically incorporated into the hospital agenda rather than being a pending action point for after the meeting. Many teams, however, cannot perform this task in situ, increasing the post-meeting workload.

#### *(10) Evaluation of MDT outcomes*

ICTs have had a negligible impact on evaluation of MDT activities and outcomes. It is not unusual to see the generation of independent Excel files recording MDTs' outcomes — with approval of ethical committee and informed consent of patients —, unconnected from the HIS interface of other operating systems. These experiences often depend solely on personal efforts, sometimes related to publications; they are not systematised. Furthermore, the records are usually generated retrospectively, entailing added work and potential errors. Exceptionally, hospital HIS include evaluation systems that automatically measure toxicity, stages (I, II...), or other intermediate and outcome indicators. But these experiences are limited in number. As those functionalities are overwhelmingly related to the generation of structured data points, they cannot capture the context of free-text records. Paradoxically, this situation predominates in conventional patient care, while in clinical trials the activity registries are far more standardised and structured.

After analysing the data, the set of ICTs and care components studied was synthesized on the basis of the 4 domains in Fig. 2.

**Table 3.** Verbatim examples for each category.

| <b>Clinical data and IT contextual factors</b>                                                                                                                                                                                                                                                                                                                                                                                                                                                                                                                                                                                                                                                                                               |
|----------------------------------------------------------------------------------------------------------------------------------------------------------------------------------------------------------------------------------------------------------------------------------------------------------------------------------------------------------------------------------------------------------------------------------------------------------------------------------------------------------------------------------------------------------------------------------------------------------------------------------------------------------------------------------------------------------------------------------------------|
| <p>"The Electronic Health Record (EHR) is an evolution from paper, but it is not an integrated information environment."</p> <p>"We're slaves to pdfs. We live in the era of medical information in pdf format. The problem is always finding it and using it."</p> <p>"In my hospital there are a lot of systems and quite often they don't talk to each other. For example, intensive care has a whole different system, so we can't see what patients have behind if they come from this service. You don't see the data; you see the summary."</p> <p>"For some CT scans, we cannot radiate the patient again, so we go all the way to retrieve this information, calling the centres, etc. We do not repeat exams for this reason."</p> |

1  
2  
3  
4  
5  
6  
7  
8  
9  
10  
11  
12  
13  
14  
15  
16  
17  
18  
19  
20  
21  
22  
23  
24  
25  
26  
27  
28  
29  
30  
31  
32  
33  
34  
35  
36  
37  
38  
39  
40  
41  
42  
43  
44  
45  
46  
47  
48  
49  
50  
51  
52  
53  
54  
55  
56  
57  
58  
59  
60

“For haematology, when we ask for whole body PET but some centres just forget and send it partially. And then you have to repeat tests.”

**(a) Preparation and organisation of the MTM**

“We use a template, a structured framework, since junior doctors are in charge of case presentation.”

“In the old times we were just sitting next to each other, discussing the files, looking at the images, and someone was moderating the session”.

“Sometimes we [diagnostician] have to say ‘I’ll give you advice the next day’ and check again at my dedicated work station.”

**(b) Clinical decision-making process**

“The PROMs will be important in the future to make decisions in MTMs. With PROMS the patient is involved in the decision-making process. His/her data is there. It is real time data.”

[On CDSS:] “These systems appear as a black box. You don’t know what studies and data are in the algorithm. People are afraid because of that.”

“AI may help but the model is not pressing a button and a decision is made.

Interaction between drugs is one of the most evident challenges for a CDSS.”

“The MTM includes molecular information based on biomarkers like Ki67 or HER, but which originates in the immunohistochemistry and FISH [Fluorescence In Situ Hybridization test], not in the NGS [Next Generation Sequencing]. We’re still in the clinical era, but a transition has started.”

**(c) Recording of decisions and outcome evaluation**

“From an IT perspective, structured reporting of decisions would be a big change. It’s the clarity that changes, what you don’t find on a free-text report.”

“ICTs are mainly found before making decisions. Afterwards they don’t help us: we don’t have much time to arrange the citations, to follow and monitor patients, to look at the results and so on. This could make a difference in optimising the resources.”

“Sometimes you need something really important for clinical practice and you don’t have it. There is also a lot of unnecessary data.”

## Discussion

This study found 10 ICT/HIS functionalities and ICT-driven care components that to a greater or lesser extent have been adopted and impact MTMs informational and decision-making processes. Our results indicate that ICTs play a key role in opening MTMs to other institutions and departments (by means of virtual MTMs and molecular tumour boards) as well as to patients through data registries that have an impact on these processes in real time (e.g., PROMs). ICTs also contribute to increasing the internal efficiency of teams, for example, through multidisciplinary electronic agendas to draw up patient lists or through structured, personalised case presentations. These technologies are also enabling the use of operating systems intended to improve MTM decisions (e.g., real-world data in CDSS) and contribute to assessing team performance. Although the degree of adoption of ICTs and care components is uneven among different European health systems and there is a high variability,<sup>17</sup> our results showed common trends in digital, dynamic interaction between team members and the larger health ecosystem (beyond the hospital setting), and the integration of patient inputs and support systems as well as from physician-generated information. Globally, this situation paved the way to transform MTM model away from a decision-making process bound within an isolated room, and mark a second transition in the process of MDT development.

That said, our study highlights the low concordance between MDTs' information needs and the adequacy of current IT context. Hospital HIS are still based on reports and clinical services, rather than organised along care processes, and the combination of 'passive' HIS and EHRs – conceived as instruments to store and classify information, not to work with it – plus the massive generation of unstructured data in the form of free-text pdf files, is the clearest expression of this gap. Keen describes this mismatch, noting that while health services are increasingly based on a network model, where health professionals and service managers coordinate multiple services on behalf of patients, many digital services are still being designed in line with a bureaucratic data processing model.<sup>18</sup> Because ICT use may be suboptimal, other authors call for identifying how ICTs can be implemented effectively in multidisciplinary cancer care.<sup>8,19</sup> One example of this misalignment was revealed by a European Society of Radiology survey, which showed that only 44% of the PACS in Europe are connected to a video projector enabling direct visualisation of images during the MTM.<sup>20</sup> Significantly, video conferencing technology and case preparation are among the 10 most-cited factors influencing MTMs' decision-making.<sup>21</sup> In this context, private companies have taken the initiative in developing software platforms to standardise patient data collection and case presentation.

1  
2  
3 While open dialogue continues to be the cornerstone of MTMs, the form of this dialogue is more  
4 and more intertwined with the context. One of the informants recalled that “in the old times we  
5 were just sitting next to each other, discussing the files, looking at the images, and someone was  
6 moderating the session” (table 2). Since the hypothesis arising from our research is that the MTM  
7 model is in transition, it is worth outlining some critical aspects of this emerging model:  
8  
9

10  
11  
12 First, the MTM coordinator, whose overarching role is to manage patient lists and promote clinical  
13 consensus, could also potentially assume functions related to synchronising the team and the  
14 different interfaces (molecular tumour boards, virtual MTM) along with the inputs generated or  
15 facilitated by ICTs (CDSS, PROMs). This figure could also proactively manage the patient agenda, for  
16 instance by validating the stratification of cases proposed by different professionals. This aspect is  
17 especially urgent considering the increasing incidence of malignancies and the evident management  
18 challenges involved in guaranteeing a reasonable time period to discuss clinically complex cases in a  
19 multidisciplinary forum. A Dutch study analysed 105,000 cancer cases to identify pathways for  
20 increasing health system efficiency and proposed stratifying cases in three levels according to the  
21 need for multidisciplinary evaluation.<sup>22</sup>  
22  
23

24  
25  
26 Second, the current proliferation of ICTs and care components in the MTM context requires  
27 rationalisation of their use based on medical criteria – not only technological feasibility. For instance,  
28 the use of artificial intelligence (or deep learning) in CDSS illustrates the ethical dilemmas and  
29 misgivings that can arise. As other authors stressed, while discussion remains active on how AI could  
30 ‘revolutionise’ healthcare delivery, there is a lack of direction and evidence on how AI could actually  
31 benefit patients.<sup>23</sup> The use of ICTs was clearly accelerated during the COVID-19 pandemic. Recent  
32 evaluations in the UK led some authors to suggest that virtual MTMs will be an alternative to face-  
33 to-face meetings and a standard component of future clinical workflows,<sup>24</sup> while others request  
34 caution since quality of the multidisciplinary discussion was hampered.<sup>25</sup>  
35  
36  
37  
38  
39  
40  
41  
42  
43  
44

45  
46 Finally, the transition towards a new MTM model, more connected to its surroundings and capable  
47 of integrating different kinds of information, will lag unless HIS overcome current limitations for  
48 providing structured data, allowing MDTs to assess their performance and outcomes.  
49

50  
51 Additionally, while it is desirable for organisationally and culturally mature MDTs to integrate ICTs  
52 that increase their effectiveness and efficiency, the adoption of ICTs does not preclude professionals’  
53 and MDTs’ need for support. These technologies may generate an additional workload for  
54 professionals, especially when they are being introduced. A data manager or administrative or IT  
55 support should accompany the implementation and use of ICTs, especially when (as observed in our  
56 study) interoperability problems between HIS from different hospitals already impose a heavy  
57  
58  
59  
60

1  
2  
3 workload. Interhospital referrals and discussions are increasing, buoyed by regionalisation of  
4 services, centralisation policies, and networks that share care processes among different hospitals.  
5 The relevant experience of the European reference networks (ERNs) for rare diseases stand out in  
6 this respect, representing a practical model through which teams from different countries share  
7 information and make decisions using an approach fully reliant on ICTs.<sup>26,27</sup>  
8  
9

10  
11  
12 This study has both strengths and limitations. One strength relates to the criteria used to select the  
13 sample, which included interviewees from different specialties and health systems. Moreover, to  
14 avoid social desirability bias, where participants might misrepresent their improvement efforts to  
15 provide desirable answers,<sup>28</sup> we asked informants to describe both positive and negative  
16 experiences when presenting their cases. In the case of ESMO and ESGO, the participants were  
17 selected specifically by the researchers since ESMO do not belong to ECCO and the surgical societies  
18 did not react to the initiative. Regarding the limitations, the small number of participants meant it  
19 was impossible to capture all ICT functionalities and care components being used in MTMs. Also, as  
20 the study was exploratory by nature, we did not achieve data saturation. Another potential  
21 limitation relates to the participant selection process, based on proposals put forward by each  
22 scientific society, which could have biased selection towards individuals who had had successful  
23 experiences. Finally, one scientific society did not find the adequate professional profile to be  
24 involved in the study.  
25  
26  
27  
28  
29  
30  
31  
32  
33

34  
35 The participants in the workshop became co-authors of this study, thereby giving rise to potential  
36 participant bias. Relevantly, they were proposed as co-authors once the workshop was held, so data  
37 collection was not altered. In general, this shift in their position implied two adjustments: first, the  
38 preliminary results — including the process of thematic analysis — were disclosed to them but, in  
39 order to avoid the research bias, they were allowed to discuss their interpretation only in the  
40 Discussion (i.e., their views did not affect the results and the selected verbatim), which is a  
41 limitation. Hence, they were offered to resign as co-authors, if disagree. Second, it should be noted  
42 that the researchers leading the study openly discussed the implications of the results as well as the  
43 conclusions of the study on an equal basis with the invited co-authors.  
44  
45  
46  
47  
48  
49

50  
51 In brief, ICTs and associated care components are transforming informational and decision-making  
52 processes along the three stages of MTM development. Factors driving their introduction include  
53 the increased personalisation required by clinical and care approaches as well as the need for more  
54 efficiency in MTM informational processes. The emerging MTM model is better integrated in the  
55 wider health system context (beyond the hospital setting) and better equipped to incorporate inputs  
56 from patients and support systems, making MTMs more dynamic and interconnected. While these  
57  
58  
59  
60

1  
2  
3 changes signal a second transition in the development process of MDTs, they are occurring in a  
4 context marked by gaps between MDTs' information and management needs and the adequacy of  
5 current IT systems. This situation needs to change before MDTs can develop their full potential.  
6  
7  
8  
9  
10  
11  
12  
13  
14  
15  
16

### 17 **Acknowledgements**

18  
19 We should like to thank Ricard Price who so unstintingly shared his thoughts with us and supported  
20 the organisation of the study field. Further, we are grateful to Ms. Meggan Harris for her editorial  
21 support.  
22  
23  
24  
25  
26

### 27 **Competing interests' statement**

28 None declared.  
29  
30  
31

### 32 **Patient consent for publication**

33 Not required.  
34  
35  
36  
37

### 38 **Contributors**

39  
40 JP and JMB conceptualised this study. LDL, KG, EJ, CL, JM, JP, DR, RS, VV, CC and JP made substantial  
41 contributions to the acquisition and analysis of data for the work. JP and CC wrote the draft, and  
42 JMB supervised the manuscript. JP, CC, LDL, KG, EJ, CL, JM, JP, DR, RS, VV and JMB provided  
43 intellectual content, edited the manuscript, approved the final version for submission and agree to  
44 be accountable for all aspects of the work. JP, CC and JMB managed the overall design of the study.  
45  
46  
47  
48  
49  
50  
51

### 52 **Funding Statement**

53 This work was supported by the Innovative Partnership for Action Against Cancer Joint Action (Grant  
54 Agreement number: 801520 — iPAAC — HP-JA-2017), which has received funding from the  
55 European Union through the Consumers, Health, Agriculture and Food Executive Agency of the  
56 European Commission, in the framework of the Health Programme 2014–2020. This work was also  
57  
58  
59  
60

1  
2  
3 supported by the Agència de Gestió d'Ajuts Universitaris i de Recerca (AGAUR, 2017SGR735),  
4 Government of Catalonia, Spain. This institution played no role in the design of the study, collection,  
5 analysis and interpretation of data, and in writing the manuscript.  
6  
7  
8  
9

10  
11 **Figure 1.** Coding tree for thematic analysis

12  
13 **Figure 2.** ICTs and care components used during the MTM stages

14  
15 **Note:** The column on the right defines the three stages (a-b-c) of informational and decision-making  
16 processes related to MTMs, from preparation to outcome evaluation. The ICT/HIS functionalities  
17 (left column) and ICTs-driven care components (central column) are shown stage-by-stage. The  
18 contextual factors are displayed at the top as a transversal domain.  
19  
20  
21  
22  
23  
24  
25  
26  
27  
28  
29  
30  
31  
32  
33  
34  
35  
36  
37  
38  
39  
40  
41  
42  
43  
44  
45  
46  
47  
48  
49  
50  
51  
52  
53  
54  
55  
56  
57  
58  
59  
60

**Ethics Statement**

This study involves human participants but an Ethics Committee(s) or Institutional Board(s) exempted this study.

**Data Availability Statement**

All data relevant to the study are included in the article or uploaded as supplementary information.

For peer review only



## References

- 1 Borrás JM, Albrecht T, Audisio R, *et al.* Policy statement on multidisciplinary cancer care: European Partnership for Action Against Cancer Consensus Group. *Eur J Cancer* 2014;50:475–80.
- 2 Saini KS, Taylor C, Ramirez AJ, *et al.* Role of the multidisciplinary team in breast cancer management: results from a large international survey involving 39 countries. *Annals of Oncology* 2012;23:853–9.
- 3 Prades J, Remue E, van Hoof E, *et al.* Is it worth reorganising cancer services on the basis of multidisciplinary teams (MDTs)? A systematic review of the objectives and organisation of MDTs and their impact on patient outcomes. *Health Policy* 2015;119:464–74.
- 4 Berghmans T, Lievens Y, Aapro M, *et al.* European Cancer Organisation Essential Requirements for Quality Cancer Care (ERQCC): Lung cancer. *Lung Cancer* 2020;150:221–39.
- 5 Andritsch E, Beishon M, Bielack S, *et al.* ECCO Essential Requirements for Quality Cancer Care: Soft Tissue Sarcoma in Adults and Bone Sarcoma. A critical review. *Crit Rev Oncol Hematol* 2017;110:94–105.
- 6 Wilson AR, Marotti L, Bianchi S, *et al.* EUSOMA (European Society of Breast Cancer Specialists). The requirements of a specialist Breast Centre. *Eur J Cancer* 2013;49(17):3579–87.
- 7 Organisation of European Cancer Institutes (OECI) Standards (Accreditation and Designation Programme), 2019. [https://www.oeci.eu/accreditation/Page.aspx?name=OECI\\_STANDARDS](https://www.oeci.eu/accreditation/Page.aspx?name=OECI_STANDARDS)
- 8 Janssen A, Brunner M, Keep M, *et al.* Interdisciplinary eHealth Practice in Cancer Care: A Review of the Literature. *Int J Environ Res Public Health* 2017;14(11):1289.
- 9 Kutikov A, Weinberg DS, Edelman MJ, *et al.* A War on Two Fronts: Cancer Care in the Time of COVID-19. *Ann Intern Med* 2020;172(11):756–758.
- 10 Tepper DL, Burger AP, Weissman MA. Hands Down, COVID-19 Will Change Medical Practice. *Am J Manag Care* 2020;26(9):e274–e275.
- 11 Kitzinger J. Qualitative research. Introducing focus groups. *BMJ* 1995;311(7000):299–302.
- 12 Carlsen B, Glenton C. What about N? A methodological study of sample-size reporting in focus group studies. *BMC Med Res Methodol* 2011;11:26.
- 13 Sofaer S. Qualitative research methods. *Int J Qual Health Care* 2002;14:329e36.
- 14 Miles M, Huberman A. *Qualitative data analysis*. Newbury Park, CA: Sage Publications, 1994.
- 15 Muhr T. *ATLAS.ti 9 for Windows*. Berlin: Scientific Software Development, 2011.
- 16 Tong A, Sainsbury P, Craig J. Consolidated criteria for reporting qualitative research (COREQ): a 32-item checklist for interviews and focus groups. *Int J Qual Health Care* 2007;19:349–57.
- 17 World Health Organisation (WHO). From innovation to implementation. eHealth in the European Region. WHO Regional Office for Europe. Copenhagen Denmark. WHO Regional Office for Europe, 2016. <http://www.euro.who.int/en/ehealth>.
- 18 Keen J. Digital health care: Cementing centralisation? *Health Informatics Journal* 2014;20(3):168–75.
- 19 Janssen A, Robinson T, Brunner M, *et al.* Multidisciplinary teams and ICT: a qualitative study exploring the use of technology and its impact on multidisciplinary team meetings. *BMC Health Serv Res* 2018;18(1):444.
- 20 Neri E, Gabelloni M, Bäuerle T, *et al.* Involvement of radiologists in oncologic multidisciplinary team meetings: an international survey by the European Society of Oncologic Imaging. *Eur Radiol* 2021;31(2):983–91.

1  
2  
3  
4  
5  
6  
7  
8  
9  
10  
11  
12  
13  
14  
15  
16  
17  
18  
19  
20  
21  
22  
23  
24  
25  
26  
27  
28  
29  
30  
31  
32  
33  
34  
35  
36  
37  
38  
39  
40  
41  
42  
43  
44  
45  
46  
47  
48  
49  
50  
51  
52  
53  
54  
55  
56  
57  
58  
59  
60

---

<sup>21</sup> Soukup T, Lamb BW, Arora S, *et al.* Successful strategies in implementing a multidisciplinary team working in the care of patients with cancer: an overview and synthesis of the available literature. *J Multidiscip Healthc* 2018;11:49-61.

<sup>22</sup> Walraven JEW, Desar IME, Hoeven van der JJM, *et al.* Analysis of 105.000 patients with cancer: have they been discussed in oncologic multidisciplinary team meetings? A nationwide population-based study in the Netherlands. *Eur J Cancer* 2019;121:85-93.

<sup>23</sup> Lau AYS, Staccini P. Artificial Intelligence in Health: New Opportunities, Challenges, and Practical Implications. *Yearb Med Inform* 2019;28(1):174-78.

<sup>24</sup> Sidpra J, Chhabda S, Gaier C, *et al.* Virtual multidisciplinary team meetings in the age of COVID-19: an effective and pragmatic alternative. *Quant Imaging Med Surg* 2020;10(6):1204-07.

<sup>25</sup> To N, Bekker HL, Henry K, *et al.* COVID-19 restrictions on multidisciplinary team meeting decision-making: service evaluation in a major UK cancer centre. *Br J Surg* 2021;108(4):e162-3.

<sup>26</sup> European Commission, European Reference Networks (ERNs), 2018. [https://ec.europa.eu/health/ern\\_en](https://ec.europa.eu/health/ern_en).

<sup>27</sup> Joint Action on Rare Cancer (JARC). Rare Cancer Agenda 2030 - Ten Recommendations from the EU Joint Action on Rare Cancers, 2018. [https://www.jointactionrarecancers.eu/attachments/article/265/Rare\\_Cancer\\_Agenda\\_2030.pdf](https://www.jointactionrarecancers.eu/attachments/article/265/Rare_Cancer_Agenda_2030.pdf).

<sup>28</sup> Sudman S, Bradburn NM, Schwartz N. *Thinking about answers: the application of cognitive processes to survey methodology*. San Francisco: Jossey-Bass, 1996.

1  
2  
3  
4  
5  
6  
7  
8  
9  
10  
11  
12  
13  
14  
15  
16  
17  
18  
19  
20  
21  
22  
23  
24  
25  
26  
27  
28  
29  
30  
31  
32  
33  
34  
35  
36  
37  
38  
39  
40  
41  
42  
43  
44  
45  
46  
47  
48  
49  
50  
51  
52  
53  
54  
55  
56  
57  
58  
59  
60

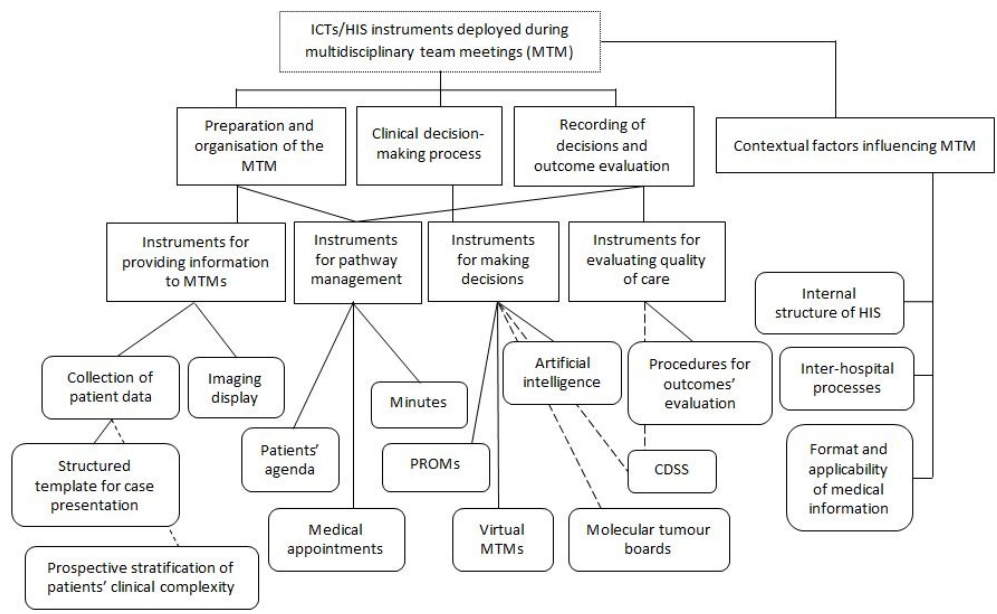

236x146mm (96 x 96 DPI)

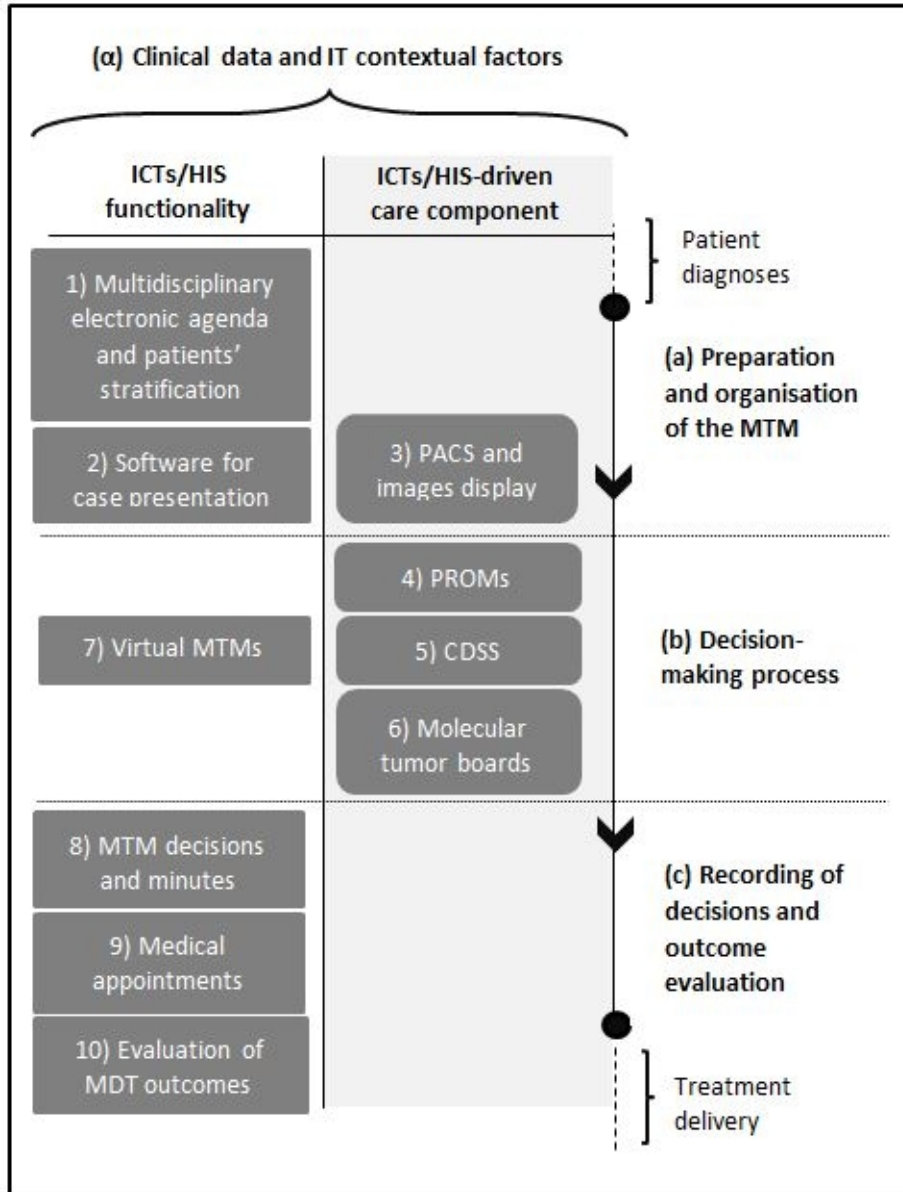

126x165mm (96 x 96 DPI)

Supplementary Table 1: COREQ checklist.

| Domain 1: Research team and reflexivity |                                                                                                                                                                                                                                                                                                                                                                                                                                                                                                                                                                                                                                                                                                                                                                                                                                                                                                                                                                                                                                                                                                                                                    | Location in manuscript (Section, page no.) |
|-----------------------------------------|----------------------------------------------------------------------------------------------------------------------------------------------------------------------------------------------------------------------------------------------------------------------------------------------------------------------------------------------------------------------------------------------------------------------------------------------------------------------------------------------------------------------------------------------------------------------------------------------------------------------------------------------------------------------------------------------------------------------------------------------------------------------------------------------------------------------------------------------------------------------------------------------------------------------------------------------------------------------------------------------------------------------------------------------------------------------------------------------------------------------------------------------------|--------------------------------------------|
| <b>Personal Characteristics</b>         |                                                                                                                                                                                                                                                                                                                                                                                                                                                                                                                                                                                                                                                                                                                                                                                                                                                                                                                                                                                                                                                                                                                                                    |                                            |
| 1. Interviewer/facilitator              | <i>Which author/s conducted the interview or focus group?</i><br>JP, CC, JMB                                                                                                                                                                                                                                                                                                                                                                                                                                                                                                                                                                                                                                                                                                                                                                                                                                                                                                                                                                                                                                                                       | Methods, p. 6.                             |
| 2. Credentials                          | <i>What were the researcher's credentials?</i><br>JP – MPh, PhD; CC – PhD Candidate; LL – MD; KG – MD; EJ – MD; CL – MD; JM – RN; JP – MD; DR – MD; RS – MD, PhD; VV – MD; JMB – MD, PhD                                                                                                                                                                                                                                                                                                                                                                                                                                                                                                                                                                                                                                                                                                                                                                                                                                                                                                                                                           | -                                          |
| 3. Occupation                           | <i>What was their occupation at the time of the study?</i><br>JP – Senior researcher in cancer healthcare & policy analysis and Associated Professor (Faculty of Medicine, University of Barcelona)<br>CC – Junior researcher in health economics<br>JMB – Director of the Cancer Strategy in Catalonia and Spain and Professor of the Faculty of Medicine (University of Barcelona)<br>CL – Director of the Organisation of European Cancer Institutes (OECI)<br>LL, KG, EJ, JP, DR, RS, VV – Medical doctors in the different specialties they represent (RS, DR and VV are also Head of Service)<br>JM – Nurse specialist in cancer and President of the European Oncology Nursing Society (EONS)                                                                                                                                                                                                                                                                                                                                                                                                                                               | Extended information in table 1, p. 6      |
| 4. Gender                               | <i>Was the researcher male or female?</i><br>Male (n=9) and female (n=3) researchers                                                                                                                                                                                                                                                                                                                                                                                                                                                                                                                                                                                                                                                                                                                                                                                                                                                                                                                                                                                                                                                               | Table 1, p. 6                              |
| 5. Experience and training              | <i>What experience or training did the researcher have?</i><br>The leading researcher (JP) has extensive experience in the analysis of multidisciplinary teams, either from the perspective of their design and implementation, their impact on patient outcomes or their relevance as a principal node in cancer networks (e.g., Prades et al, HP, 2014; Prades et al, HSMR, 2017; Prades et al, BMC Public Health, 2011). JP and JMB has published a number of studies using qualitative research, including interviews, focus groups (e.g., those mentioned above and Prades et al, Breast, 2014; Prades et al, Radiother Oncol, 2017; Prades et al, EJPH, 2016) in biomedical journals, and promoted consensus among experts in different EU initiatives (Prades et al, ESMO Open, 2020). Two of these initiatives were devoted specifically to the development of cancer MDT both in Europe (Borras et al, EJC, 2014) and Spain (Guilabert and Prades, JMIR, 2021), the latter being an on-line self-assessment tool for cancer MDTs.<br>CC is a junior health economist that, aside from her experience in healthcare organisation analysis, | -                                          |

|                                             |                                                                                                                                                                                                                                                                                                                                                                                                                                                                                                                                                                                                                                                                                                                                                                                                                                                                                                                                                                                                                                                                                                                                                                                                                                                                                                  |                   |
|---------------------------------------------|--------------------------------------------------------------------------------------------------------------------------------------------------------------------------------------------------------------------------------------------------------------------------------------------------------------------------------------------------------------------------------------------------------------------------------------------------------------------------------------------------------------------------------------------------------------------------------------------------------------------------------------------------------------------------------------------------------------------------------------------------------------------------------------------------------------------------------------------------------------------------------------------------------------------------------------------------------------------------------------------------------------------------------------------------------------------------------------------------------------------------------------------------------------------------------------------------------------------------------------------------------------------------------------------------|-------------------|
|                                             | participated in one of these EU initiatives (Prades et al, ESMO Open, 2020).                                                                                                                                                                                                                                                                                                                                                                                                                                                                                                                                                                                                                                                                                                                                                                                                                                                                                                                                                                                                                                                                                                                                                                                                                     |                   |
| <b>Relationship with participants</b>       |                                                                                                                                                                                                                                                                                                                                                                                                                                                                                                                                                                                                                                                                                                                                                                                                                                                                                                                                                                                                                                                                                                                                                                                                                                                                                                  |                   |
| 6. Relationship established                 | <p><i>Was a relationship established prior to study commencement?</i></p> <p>There was no relationship between the informants and the researchers managing the study (JP, CC and JMB). Relevantly for this study, key informants (healthcare professionals) did not know each other before the study.</p>                                                                                                                                                                                                                                                                                                                                                                                                                                                                                                                                                                                                                                                                                                                                                                                                                                                                                                                                                                                        | -                 |
| 7. Participant knowledge of the interviewer | <p><i>What did the participants know about the researcher? e.g. personal goals, reasons for doing the research.</i></p> <p>Participants in the workshop/focus group were briefed on the purpose of the study through their respective scientific societies. Their participation was an integral part of articulating the experience introducing ICT in their health system in the form of a case study (first part of the workshop). The letter of invitation used to that end was prepared by the researchers and used by the gatekeeper (ECCO). Such information showed the general goal and the requirements to participate, which for instance highlighted the proper professional profiles given the medical (not purely IT) nature of the study. Due to the relevance of the participants' contribution and their close involvement in generating knowledge during the study (i.e., the presentation of cases that underpin the discussion of ICT adoption processes, the critical review, and the validation of results), they were invited to co-author the paper. to the relevant contribution of the participants and their deep involvement (i.e., full-day workshop plus discussion, critical revision, and validation of results), they were invited to co-authorise the paper.</p> | Methods, p. 5     |
| 8. Interviewer characteristics              | <p><i>What characteristics were reported about the interviewer/facilitator? e.g. Bias, assumptions, reasons and interests in the research topic</i></p> <p>The researchers leading the study (JP, CC and JMB) had no direct experience with the topics included in the paper, except for multidisciplinary cancer care. In order to avoid social desirability bias, where participants might misrepresent their improvement efforts to provide desirable answers, we asked informants to describe both positive and negative experiences when presenting their cases.</p>                                                                                                                                                                                                                                                                                                                                                                                                                                                                                                                                                                                                                                                                                                                        | Discussion, p. 16 |
| <b>Domain 2: study design</b>               |                                                                                                                                                                                                                                                                                                                                                                                                                                                                                                                                                                                                                                                                                                                                                                                                                                                                                                                                                                                                                                                                                                                                                                                                                                                                                                  |                   |
| <b>Theoretical framework</b>                |                                                                                                                                                                                                                                                                                                                                                                                                                                                                                                                                                                                                                                                                                                                                                                                                                                                                                                                                                                                                                                                                                                                                                                                                                                                                                                  |                   |
| 9. Methodological orientation and Theory    | <p><i>What methodological orientation was stated to underpin the study? e.g. grounded theory, discourse, analysis, ethnography, phenomenology, content analysis</i></p> <p>We used open coding and applied thematic analysis.</p>                                                                                                                                                                                                                                                                                                                                                                                                                                                                                                                                                                                                                                                                                                                                                                                                                                                                                                                                                                                                                                                                | Methods, p. 6     |

| <b>Participant selection</b>     |                                                                                                                                                                                                                                                                                                                                                                                                |                       |
|----------------------------------|------------------------------------------------------------------------------------------------------------------------------------------------------------------------------------------------------------------------------------------------------------------------------------------------------------------------------------------------------------------------------------------------|-----------------------|
| 10. Sampling                     | <i>How were participants selected? e.g. purposive, convenience, consecutive, Snowball</i><br>Purposive sample including key informants from the most relevant disciplines related to cancer care. Informants were recruited via European scientific societies and ECCO (mentioned above, see 7). Three of them were not able to get involved in focus group and were interviewed individually. | Methods, p. 5         |
| 11. Method of approach           | <i>How were participants approached? e.g. face-to-face, telephone, mail, email</i><br>Informants were designated by the scientific societies to whom they belong. The specific method of approach used by them was blinded to both the gatekeeper and the researchers managing the study.                                                                                                      | Methods, p. 5         |
| 12. Sample size                  | <i>How many participants were in the study?</i><br>Nine                                                                                                                                                                                                                                                                                                                                        | Methods, p. 5         |
| 13. Non-participation            | <i>How many people refused to participate or dropped out? Reasons?</i><br>One scientific society did not find the adequate professional profile to be involved in the study.                                                                                                                                                                                                                   | Discussion, p. 16     |
| <b>Setting</b>                   |                                                                                                                                                                                                                                                                                                                                                                                                |                       |
| 14. Setting of data collection   | <i>Where was the data collected? e.g. home, clinic, workplace</i><br>Data was collected in a neutral setting, the European Cancer Organisation (ECCO) headquarters in Brussels.                                                                                                                                                                                                                | Methods, p. 5         |
| 15. Presence of non-participants | <i>Was anyone else present besides the participants and researchers?</i><br>No.                                                                                                                                                                                                                                                                                                                | -                     |
| 16. Description of sample        | <i>What are the important characteristics of the sample? e.g. demographic data, date</i><br>A multidisciplinary European workshop, lasting approximately 5 hours, was organised on 5 July 2019. Participants belonged to different European scientific societies, specialties, countries (Italy, Spain, Belgium, and Croatia) and regional healthcare systems (table 1).                       | Methods, p. 5         |
| <b>Data collection</b>           |                                                                                                                                                                                                                                                                                                                                                                                                |                       |
| 17. Interview guide              | <i>Were questions, prompts, guides provided by the authors? Was it pilot tested?</i><br>The focus group script (table 2) was never delivered to the informants but the main topics to be dealt with were announced at the beginning of the workshop. The same script was used to conduct the semi-structured interviews.                                                                       | -                     |
| 18. Repeat interviews            | <i>Were repeat interviews carried out? If yes, how many?</i><br>No.                                                                                                                                                                                                                                                                                                                            | -                     |
| 19. Audio/visual recording       | <i>Did the research use audio or visual recording to collect the data?</i><br>The focus group and semi-structured interviews were audio recorded using a digital recorder.                                                                                                                                                                                                                     | Methods, p.5 and p. 6 |
| 20. Field notes                  | <i>Were field notes made during and/or after the</i>                                                                                                                                                                                                                                                                                                                                           | Methods, p. 6         |



|                                        |                                                                                                                                                                                                                                                                                                                                                                                         |                    |
|----------------------------------------|-----------------------------------------------------------------------------------------------------------------------------------------------------------------------------------------------------------------------------------------------------------------------------------------------------------------------------------------------------------------------------------------|--------------------|
|                                        | <i>interview or focus group?</i><br>The researchers (CC, JP) took field notes during the case study presentations (not the focus group).                                                                                                                                                                                                                                                |                    |
| 21. Duration                           | <i>What was the duration of the interviews or focus group?</i><br>The focus group lasted 2 hours and the interviews ranged from 46 to 52 minutes.                                                                                                                                                                                                                                       | -                  |
| 22. Data saturation                    | <i>Was data saturation discussed?</i><br>Yes, it is explained why data saturation was neither achieved nor a desired result.                                                                                                                                                                                                                                                            | Discussion, p. 16. |
| 23. Transcripts returned               | Were transcripts returned to participants for comment and/or correction?<br>No.                                                                                                                                                                                                                                                                                                         | -                  |
| <b>Domain 3: analysis and findings</b> |                                                                                                                                                                                                                                                                                                                                                                                         |                    |
| <b>Data analysis</b>                   |                                                                                                                                                                                                                                                                                                                                                                                         |                    |
| 24. Number of data coders              | <i>How many data coders coded the data?</i><br>One.                                                                                                                                                                                                                                                                                                                                     | Methods, p. 6      |
| 25. Description of the coding tree     | <i>Did authors provide a description of the coding tree?</i><br>No.                                                                                                                                                                                                                                                                                                                     | -                  |
| 26. Derivation of themes               | <i>Were themes identified in advance or derived from the data?</i><br>Our focus was the ICTs and ICT-driven care components, and these findings were derived directly from the data.                                                                                                                                                                                                    | Methods            |
| 27. Software                           | <i>What software, if applicable, was used to manage the data?</i><br>Atlas-ti 6.2 and Microsoft Word                                                                                                                                                                                                                                                                                    | Methods, p. 6      |
| 28. Participant checking               | <i>Did participants provide feedback on the findings?</i><br>JP, CC, JMB circulated the initial draft among participants. They made suggestions and proposed changes with regards to the <i>Discussion</i> , and endorsed the <i>Results</i> .                                                                                                                                          | Methods, p. 6      |
| <b>Reporting</b>                       |                                                                                                                                                                                                                                                                                                                                                                                         |                    |
| 29. Quotations presented               | <i>Were participant quotations presented to illustrate the themes / findings? Was each quotation identified? e.g. participant number</i><br>We presented quotations (table 3) organised around main topics. Since the number of participants was limited, we did not identify each one.                                                                                                 | Methods, p. 13     |
| 30. Data and findings consistent       | <i>Was there consistency between the data presented and the findings?</i><br>Yes.                                                                                                                                                                                                                                                                                                       | Methods            |
| 31. Clarity of major themes            | Were major themes clearly presented in the findings?<br>Yes.                                                                                                                                                                                                                                                                                                                            | Results            |
| 32. Clarity of minor themes            | <i>Is there a description of diverse cases or discussion of minor themes?</i><br>Yes. We presented all ICTs and ICT-driven care components found in MTMs' work. Some of them were said to be mostly adopted while other scarcely adopted. However, we did not intend to evaluate the degree of their adoption but which ones were used in clinical practice and the related challenges. | Results            |
